# Supplementary material for: Comparison of models to predict incident chronic liver disease: a systematic review and external validation in Chinese adults
Source: PubMed Central journal article supplement (PMC11686935; doi:10.1186/s12916-024-03754-9), 2024-12-31
Supplement: 12916_2024_3754_MOESM1_ESM.pdf [file 12916_2024_3754_MOESM1_ESM.pdf]

## Supplementary Material

### Comparison of models to predict incident chronic liver disease: a systematic review and external validation in Chinese adults

#### BMC Medicine

Xue Cong, BM<sup>1</sup>, Shuyao Song, BM<sup>1</sup>, Yingtao Li, MS<sup>1</sup>, Kaiyang Song, BA<sup>2</sup>, Cameron MacLeod, BA<sup>2</sup>, Yujie Cheng, BM<sup>1</sup>, Jun Lv, PhD<sup>1,3,4</sup>, Canqing Yu, PhD<sup>1,3,4</sup>, Dianjianyi Sun, PhD<sup>1,3,4</sup>, Pei Pei, MSc<sup>1,3</sup>, Ling Yang, PhD<sup>5,6</sup>, Yiping Chen, DPhil<sup>5,6</sup>, Iona Millwood, DPhil<sup>5,6</sup>, Shukuan Wu, BS<sup>7</sup>, Xiaoming Yang, PhD<sup>5</sup>, Rebecca Stevens, MSc<sup>5</sup>, Junshi Chen, MD<sup>8</sup>, Zhengming Chen, DPhil<sup>5</sup>, Liming Li, MD<sup>1,3,4</sup>, Christiana Kartsonaki, DPhil<sup>5,6\*</sup>#, Yuanjie Pang, DPhil<sup>1,4\*</sup># on behalf of the China Kadoorie Biobank Collaborative Group\*\*

\*Corresponding author (yuanjie.p@gmail.com, christiana.kartsonaki@dph.ox.ac.uk)

#Equal contributors

\*\*The members of steering committee and collaborative group are listed in Supplementary material.

1. Department of Epidemiology & Biostatistics, School of Public Health, Peking University, Beijing 100191, China
2. Medical Sciences Division, University of Oxford, Oxford OX3 9DU, United Kingdom
3. Peking University Center for Public Health and Epidemic Preparedness & Response, Beijing 100191, China
4. Key Laboratory of Epidemiology of Major Diseases (Peking University), Ministry of Education
5. Clinical Trial Service Unit & Epidemiological Studies Unit (CTSU), Nuffield Department of Population Health, University of Oxford
6. Medical Research Council Population Health Research Unit at the University of Oxford, Oxford OX3 7LF, United Kingdom
7. Meilan Center for Disease Control and Prevention, Haikou 570100, China
8. China National Center for Food Safety Risk Assessment, Beijing 100022, China

#### Address for correspondence:

Dr. Yuanjie Pang  
Department of Epidemiology & Biostatistics  
School of Public Health  
Peking University  
38 Xueyuan Road  
Beijing, 100191, China  
Tel: 86-010-82801528  
Fax: 86-010-82801530  
yuanjie.p@gmail.com

Dr. Christiana Kartsonaki  
Nuffield Department of Population  
Health  
University of Oxford  
Old Road Campus  
Oxford, OX3 7LF, UK  
Tel: 86-010-82801528  
Fax: 86-010-82801530  
christiana.kartsonaki@dph.ox.ac.uk

## Table of contents

|                                                                                                 |    |
|-------------------------------------------------------------------------------------------------|----|
| Members of the China Kadoorie Biobank collaborative group .....                                 | 3  |
| Method S1 Search strategy .....                                                                 | 4  |
| Method S2 China Kadoorie Biobank (CKB) information .....                                        | 6  |
| Method S3 The measurement and definition of CKB predictor variables .....                       | 8  |
| Method S4 ICD-10 of CLD events in CKB .....                                                     | 11 |
| Method S5 Predictors and equations for included models .....                                    | 12 |
| Table S1 Bias assessment .....                                                                  | 20 |
| Table S2 Predictors of prediction models for general population .....                           | 22 |
| Table S3 Predictors of prediction models for HBV infected individuals .....                     | 24 |
| Table S4 Predictors of prediction models for other populations .....                            | 26 |
| Table S5 Sensitivity analysis for PLC and HCC .....                                             | 28 |
| Table S6 CLD risk model for 5-year HCC discrimination in the published literature and CKB ..... | 29 |
| Table S7 CLD risk model for 5-year CLD discrimination in the published literature and CKB ..... | 30 |
| Table S8 CLD diseases and causes in high income countries and China in 2019 .....               | 31 |
| Table S9 Risk factors for CLD in CKB and Western populations .....                              | 32 |
| Table S10 Summary of Liver Cancer Screening Strategies .....                                    | 33 |
| Fig. S1 Calibration plots of 5-year HCC risk prediction models in the CKB .....                 | 35 |
| Fig. S2 Calibration plots of 5-year CLD risk prediction models in the CKB .....                 | 36 |
| Fig. S3 Discrimination of CLD risk prediction models in the published literature and CKB .....  | 37 |
| Fig. S4 Discrimination of HCC risk prediction models in the general population .....            | 38 |
| Fig. S5 Discrimination of HCC risk prediction models in the HBV infected individuals .....      | 39 |
| Fig. S6 Discrimination of CLD risk prediction models in the HBV infected individuals .....      | 40 |
| Fig. S7 Discrimination of CLD risk prediction models in the HCV infected individuals .....      | 41 |
| Fig. S8 Discrimination of CLD risk prediction models in the NAFLD patients .....                | 42 |

## Members of the China Kadoorie Biobank collaborative group

**International Steering Committee:** Junshi Chen, Zhengming Chen (PI), Robert Clarke, Rory Collins, Yu Guo, Liming Li (PI), Jun Lv, Richard Peto, Robin Walters. **International Co-ordinating Centre, Oxford:** Daniel Avery, Derrick Bennett, Ruth Boxall, Sue Burgess, Ka Hung Chan, Yumei Chang, Yiping Chen, Zhengming Chen, Johnathan Clarke, Robert Clarke, Huaidong Du, Ahmed Edris Mohamed, Zamy Fairhurst-Hunter, Hannah Fry, Simon Gilbert, Alex Hacker, Mike Hill, Michael Holmes, Pek Kei Im, Andri Iona, Maria Kakkoura, Christiana Kartsonaki, Rene Kerosi, Kuang Lin, Mohsen Mazidi, Iona Millwood, Sam Morris, Qunhua Nie, Alfred Pozarickij, Paul Ryder, Saredo Said, Sam Sansome, Dan Schmidt, Paul Sherliker, Rajani Sohoni, Becky Stevens, Iain Turnbull, Robin Walters, Lin Wang, Neil Wright, Ling Yang, Xiaoming Yang, Pang Yao.

**National Co-ordinating Centre, Beijing:** Yu Guo, Xiao Han, Can Hou, Jun Lv, Pei Pei, Chao Liu, Canqing Yu, Qingmei Xia. **10 Regional Co-ordinating Centres:** **Qingdao CDC:** Zengchang Pang, Ruqin Gao, Shanpeng Li, Haiping Duan, Shaojie Wang, Yongmei Liu, Ranran Du, Yajing Zang, Liang Cheng, Xiaocao Tian, Hua Zhang, Yaoming Zhai, Feng Ning, Xiaohui Sun, Feifei Li. **Licang CDC:** Silu Lv, Junzheng Wang, Wei Hou. **Heilongjiang Provincial CDC:** Wei Sun, Shichun Yan, Xiaoming Cui. **Nangang CDC:** Chi Wang, Zhenyuan Wu, Yanjie Li, Quan Kang. **Hainan Provincial CDC:** Huiming Luo, Tingting Ou. **Meilan CDC:** Xiangyang Zheng, Zhendong Guo, Shukuan Wu, Yilei Li, Huimei Li. **Jiangsu Provincial CDC:** Ming Wu, Yonglin Zhou, Jinyi Zhou, Ran Tao, Jie Yang, Jian Su. **Suzhou CDC:** Fang Liu, Jun Zhang, Yihe Hu, Yan Lu, Liangcai Ma, Aiyu Tang, Shuo Zhang, Jianrong Jin, Jingchao Liu. **Guangxi Provincial CDC:** Mei Lin, Zhenzhen Lu. **Liuzhou CDC:** Lifang Zhou, Changping Xie, Jian Lan, Tingping Zhu, Yun Liu, Liuping Wei, Liyuan Zhou, Ningyu Chen, Yulu Qin, Sisi Wang. **Sichuan Provincial CDC:** Xianping Wu, Ningmei Zhang, Xiaofang Chen, Xiaoyu Chang. **Pengzhou CDC:** Mingqiang Yuan, Xia Wu, Xiaofang Chen, Wei Jiang, Jiaqiu Liu, Qiang Sun. **Gansu Provincial CDC:** Faqing Chen, Xiaolan Ren, Caixia Dong. **Maiji CDC:** Hui Zhang, Enke Mao, Xiaoping Wang, Tao Wang, Xi zhang. **Henan Provincial CDC:** Kai Kang, Shixian Feng, Huizi Tian, Lei Fan. **Huixian CDC:** XiaoLin Li, Huarong Sun, Pan He, Xukui Zhang. **Zhejiang Provincial CDC:** Min Yu, Ruying Hu, Hao Wang. **Tongxiang CDC:** Xiaoyi Zhang, Yuan Cao, Kaixu Xie, Lingli Chen, Dun Shen. **Hunan Provincial CDC:** Xiaojun Li, Donghui Jin, Li Yin, Huilin Liu, Zhongxi Fu. **Liuyang CDC:** Xin Xu, Hao Zhang, Jianwei Chen, Yuan Peng, Libo Zhang, Chan Qu.

## Method S1 Search strategy

| No.           | Entry terms                                                                                                                                                                                                                                                                                                                                                                                                                                                                                                                                                                                                                                                                                                                                                                                   |
|---------------|-----------------------------------------------------------------------------------------------------------------------------------------------------------------------------------------------------------------------------------------------------------------------------------------------------------------------------------------------------------------------------------------------------------------------------------------------------------------------------------------------------------------------------------------------------------------------------------------------------------------------------------------------------------------------------------------------------------------------------------------------------------------------------------------------|
| <b>Pubmed</b> |                                                                                                                                                                                                                                                                                                                                                                                                                                                                                                                                                                                                                                                                                                                                                                                               |
| 1             | "hepatocellular carcinoma"[Title/Abstract] OR "liver cancer"[Title/Abstract] OR "cirrhosis"[Title/Abstract] OR "chronic liver disease*"[Title/Abstract] OR "severe liver disease*"[Title/Abstract] (n=220,289)                                                                                                                                                                                                                                                                                                                                                                                                                                                                                                                                                                                |
| 2             | "risk assessment"[MeSH Terms] OR "risk prediction"[Title/Abstract] OR "risk score"[Title/Abstract] OR "risk calculation"[Title/Abstract] OR "prediction model"[Title/Abstract] OR "predict index"[Title/Abstract] OR "decision rule"[Title/Abstract] OR "discrimination"[Title/Abstract] OR "roc curve"[Title/Abstract] OR "calibration"[Title/Abstract] OR "AUC"[Title/Abstract] OR "area under the curve"[Title/Abstract] OR "scoring system"[Title/Abstract] OR "outcome prediction"[Title/Abstract] OR "risk classification"[Title/Abstract] OR "forecasting"[Title/Abstract] OR "forecast"[Title/Abstract] OR "decision tree"[Title/Abstract] OR "predictive score"[Title/Abstract] OR "validat*"[Title/Abstract] (n=1,355,701)                                                          |
| 3             | 1 AND 2 Filters: Humans (n=13,548)                                                                                                                                                                                                                                                                                                                                                                                                                                                                                                                                                                                                                                                                                                                                                            |
| 4             | ("prospective study"[Title/Abstract] OR "retrospective study"[Title/Abstract] OR "cohort study"[Title/Abstract] OR "case control study"[Title/Abstract] OR "prospective"[Title/Abstract] OR "retrospective"[Title/Abstract] OR "cohort"[Title/Abstract] OR "case control"[Title/Abstract] OR "case cohort"[Title/Abstract]) AND (humans [Filter]) Filters: Humans (n=1,570,078)                                                                                                                                                                                                                                                                                                                                                                                                               |
| 5             | ("review"[Title] OR "letter"[Publication Type] OR "interview"[Publication Type] OR "comment"[Publication Type] OR "news"[Publication Type] OR "guideline"[Publication Type] OR "editorial"[Publication Type] OR "Bibliography"[Publication Type]) (n=2,995,276)                                                                                                                                                                                                                                                                                                                                                                                                                                                                                                                               |
| 6             | 3 AND 4 NOT 5 (n=4,021)                                                                                                                                                                                                                                                                                                                                                                                                                                                                                                                                                                                                                                                                                                                                                                       |
| 7             | 3 Filters: meta-analysis Filters: systematic review (n=429)                                                                                                                                                                                                                                                                                                                                                                                                                                                                                                                                                                                                                                                                                                                                   |
| 8             | 6 OR 7 (n=4,379)                                                                                                                                                                                                                                                                                                                                                                                                                                                                                                                                                                                                                                                                                                                                                                              |
| <b>Embase</b> |                                                                                                                                                                                                                                                                                                                                                                                                                                                                                                                                                                                                                                                                                                                                                                                               |
| 1             | hepatocellular carcinoma.ab. or hepatocellular carcinoma.ti. or liver cancer.ab. or liver cancer.ti. or cirrhosis.ab. or cirrhosis.ti. or chronic liver disease*.ab. or chronic liver disease*.ti. or severe liver disease*.ab. or severe liver disease*.ti. (n=313,023)                                                                                                                                                                                                                                                                                                                                                                                                                                                                                                                      |
| 2             | exp risk assessment/ (n=690,077)                                                                                                                                                                                                                                                                                                                                                                                                                                                                                                                                                                                                                                                                                                                                                              |
| 3             | risk prediction.ab. or risk prediction.ti. or risk score.ab. or risk score.ti. or risk calculation.ab. or risk calculation.ti. or prediction model.ab. or prediction model.ti. or predict index.ab. or predict index.ti. or decision rule.ab. or decision rule.ti. or discrimination.ab. or discrimination.ti. or roc curve.ab. or roc curve.ti. or calibration.ab. or calibration.ti. or AUC.ab. or AUC.ti. or area under the curve.ab. or area under the curve.ti. or scoring system.ab. or scoring system.ti. or outcome prediction.ab. or outcome prediction.ti. or risk classification.ab. or risk classification.ti. or forecasting.ab. or forecasting.ti. or forecast.ab. or forecast.ti. or decision tree.ab. or decision tree.ti. or predictive score.ab. or predictive score.ti. or |

|    |                                                                                                                                                                                                                                                                                                                                                                                                          |
|----|----------------------------------------------------------------------------------------------------------------------------------------------------------------------------------------------------------------------------------------------------------------------------------------------------------------------------------------------------------------------------------------------------------|
|    | validat*.ab. or validat*.ti. (n=1,502,514)                                                                                                                                                                                                                                                                                                                                                               |
| 4  | 2 or 3 (n=2,121,759)                                                                                                                                                                                                                                                                                                                                                                                     |
| 5  | 1 and 4 (n=31,685)                                                                                                                                                                                                                                                                                                                                                                                       |
| 6  | limit 5 to human (n=29,515)                                                                                                                                                                                                                                                                                                                                                                              |
| 7  | prospective study.ab. or prospective study.ti. or retrospective study.ab. or retrospective study.ti. or cohort study.ab. or cohort study.ti. or case control study.ab. or case control study.ti. or prospective.ab. or prospective.ti. or retrospective.ab. or retrospective.ti. or cohort.ab. or cohort.ti. or case control.ab. or case control.ti. or case cohort.ab. or case cohort.ti. (n=2,953,555) |
| 8  | limit 7 to human (n=2,768,117)                                                                                                                                                                                                                                                                                                                                                                           |
| 9  | review.ti. or letter.pt. or interview.pt. or comment.pt. or news.pt. or guideline.pt. or editorial.pt. or Bibliography.pt. (n=2,689,154)                                                                                                                                                                                                                                                                 |
| 10 | 6 and 8 (n=10,777)                                                                                                                                                                                                                                                                                                                                                                                       |
| 11 | 10 not 9 (n=10,579)                                                                                                                                                                                                                                                                                                                                                                                      |
| 12 | limit 6 to meta analysis (n=652)                                                                                                                                                                                                                                                                                                                                                                         |
| 13 | limit 6 to "systematic review" (n=808)                                                                                                                                                                                                                                                                                                                                                                   |
| 14 | 12 or 13 (n=1,001)                                                                                                                                                                                                                                                                                                                                                                                       |
| 15 | 11 or 14 (n=11,427)                                                                                                                                                                                                                                                                                                                                                                                      |

## **Method S2 China Kadoorie Biobank (CKB) information**

The external validation population was derived from the China Kadoorie Biobank (CKB), a large prospective Chinese population-based cohort study. The CKB study conducted the baseline survey from June 2004 to July 2008 in five urban and five rural areas of China, recruiting 512,891 adults aged 30 to 79 years<sup>1</sup>. The survey included questionnaire assessments, physical measurements, and collection of blood samples. The questionnaire included sociodemographic characteristics, lifestyle factors, personal and family medical history, and current medication use, etc. Physical measurements included height, weight, hip and waist circumference, blood pressure, and heart rate, etc. See the table below for predictors detail. All survey staff underwent standardized training and implemented computerized data management throughout the project to ensure consistency in survey protocols across regions.

In the CKB validation population, the following individuals were included:

1. **General population:** The total number of participants was 512,726. Individuals with baseline diagnoses of hepatitis or cirrhosis (n=6,193), cancer (n=2,578), or positive HBsAg results (n=27,285) at the baseline were excluded. The total study cohort included 478,930 individuals. For prediction models incorporating blood-based biomarkers, the sub-population analysis included 15,945 participants with GGT data, and 17,227 participants with ALT and AST data, applying the same exclusion criteria.
2. **HBV Infected individuals:** The total number of participants with positive HBsAg test was 15,552. Individuals with baseline diagnoses of hepatitis or cirrhosis (n=1,748) and cancer (n=98) at baseline were excluded, leaving 13,723 participants for the analysis. For prediction models involving blood-based biomarkers, the sub-population analysis included 394 participants with GGT and ALT data, applying the same exclusion criteria.

3. **Diabetes patient:** The total number of participants with diabetes was 30,301. Exclusion criteria for diabetes patients encompassed baseline diagnoses of hepatitis or cirrhosis (n=398), cancer (n=294), or positive HBsAg results (n=1,190) at the study baseline. The total number of diabetes patients included in the study was 28,540 individuals. In prediction models utilizing blood-based biomarkers, the sub-population analysis incorporated 1,540 participants with ALT biochemistry data and 1,348 participants with GGT biochemistry data, adhering to the established exclusion criteria.

The vital status of each participant was determined periodically through the China CDC's Disease Surveillance Points (DSP) system and the national health insurance system, supplemented by regular checks against local residential and health insurance records, and by annual active confirmation through street committees or village administrators. In addition, information about the occurrence of major diseases and any episodes of hospitalization was collected through linkages, using each participant's unique national identification number, with disease registries and national health insurance claims databases, which have almost universal coverage in the study areas. All events were coded using the International Classification of Diseases, 10th revision (ICD-10), by trained staff who were blinded to baseline information and reviewed centrally for consistency<sup>2</sup>. The ICD-10 of chronic liver disease (CLD) events in CKB is reported in **Method S4**. The present study included incident liver disease from enrollment until December 31, 2018, by which time a total of 56,552 (11.03%) participants had died and 4,028 (0.78%) were lost to follow-up.

### Method S3 The measurement and definition of CKB predictor variables

| Predictor                                            | Measurements                                                                                                                                                                                                                             | Units and definitions        |
|------------------------------------------------------|------------------------------------------------------------------------------------------------------------------------------------------------------------------------------------------------------------------------------------------|------------------------------|
| Sex                                                  | Questionnaire                                                                                                                                                                                                                            | Female/male                  |
| Age                                                  | Questionnaire                                                                                                                                                                                                                            | Unit: year                   |
| Body mass index (BMI)                                | Formula: $BMI = \text{weight}(\text{kg}) / \text{height}(\text{m})^2$ . Instrument: height (self-made instrument), weight (TANITATBF-300GS body composition analyzer); accuracy: one decimal place.                                      | Unit: $\text{kg}/\text{m}^2$ |
| Waist circumference (WC)                             | Measurement position: midpoint level of the line between the anterior superior iliac crest and the 12th costal edge; tool: plastic soft tape; precision: one after the decimal point; measurement time: at the end of normal expiration. | Unit: cm                     |
| Waist-to-hip ratio                                   | Measurement position: maximum extension of hip; tool: soft tape; accuracy: one decimal place.                                                                                                                                            | Unit: cm                     |
| Systolic Blood Pressure (SBP)                        | Instrument: UA-799 digital sphygmomanometer. Measurement time: sit for 5 min, repeat twice, and take the average value. If the difference is $>10$ mmHg, take the third measurement and average over the last two measurements.          | Unit: mmHg                   |
| Diastolic blood pressure (DBP)                       | Same SBP                                                                                                                                                                                                                                 | Unit: mmHg                   |
| Self-reported history of cirrhosis/chronic hepatitis | Questionnaire<br>Question: Have you been diagnosed with cirrhosis/chronic hepatitis by a doctor in a township/district hospital?                                                                                                         | (Yes/no)                     |



| Predictor                                          | Measurements                                                                                                                                                                                                                                                                                                                                                  | Units and definitions                                                                                                                                                                                                                                                                                                                                                                  |
|----------------------------------------------------|---------------------------------------------------------------------------------------------------------------------------------------------------------------------------------------------------------------------------------------------------------------------------------------------------------------------------------------------------------------|----------------------------------------------------------------------------------------------------------------------------------------------------------------------------------------------------------------------------------------------------------------------------------------------------------------------------------------------------------------------------------------|
| Self-reported history of diabetes                  | Questionnaire<br>Question: Have you been diagnosed with diabetes by a doctor in a township/district hospital?                                                                                                                                                                                                                                                 | (Yes/no)                                                                                                                                                                                                                                                                                                                                                                               |
| Newly detected diabetes during field investigation | Measurement tool: SureStep Plus System (LifeScan); Sample: Venous blood specimen. The object answered "yes" in question 1 was repeated if random blood glucose was 7.8-11.0 mmol/L.                                                                                                                                                                           | Question 1 answered "no", the newly detected diabetes at site investigation was defined as follows: (1) random glucose value 7.0 mmol/L with fasting time 8 h; or (2) random glucose value 11.1 mmol/L with fasting time < 8 h; or (3) repeated random glucose measurement 7.0 mmol/L on the next day.                                                                                 |
| Triglyceride (TG)                                  | Measurement of TG Beckman Chemistry Information Sheets: BLOSR6x118.04 2015-04. Beckman reagent (REF OSR6*118), analytical wavelength of primary 660 nm, secondary 800 nm, sample size of 1.6 µL, reagent volume(R1) 66 µL dilution of 57 µL, reagent volume(R2) 17 µL, dilution of 10 c.                                                                      | Unit: Millimoles/Little                                                                                                                                                                                                                                                                                                                                                                |
| Total cholesterol (TC)                             | Reference for TC Beckman Coulter Cholesterol Chemistry Information Sheets: BLOSR6X16.07 2015-05. Beckman reagent (REF OSR6116), analyzed at primary 540 nm, secondary 600 nm, sample size of 1.6 µL, reagent volume(R1) of 24 µL, at 96 µL dilution.                                                                                                          | Unit: Millimoles/Little                                                                                                                                                                                                                                                                                                                                                                |
| Smoking status                                     | Questionnaire<br>(1) Current frequency of smoking:<br>Question 2 of I: How much time do you smoke once now? (A=non-smoking; B=occasional; C=most days; D=daily)<br>(2) Frequency of past smoking:<br>Question I 6: In the past, have you ever had the habit of smoking every day? (A=never; B=occasionally; C=most days; D=daily)<br>(3) Daily smoking volume | The current daily smoker was defined as: Question 2=D (Yes/No)<br><br>Quitters were defined as: Question 2=A and Question 6=B+C+D (Yes/No)<br><br>Daily smoking:<br><br>Tobacco content conversion: cigarette contains 1 gram of tobacco/cigarette, cigar contains 2 grams of tobacco/cigarette, grams of pipe/hookah, hand cigarette/dry tobacco are converted by the reported value. |
| Frequency of physical exercise                     | Questionnaire<br>Question 9: In the past year, how often do you usually take a                                                                                                                                                                                                                                                                                | Metabolic equivalent (MET) for different types of physical activity was taken from the 2011 Physical Activity Outline.                                                                                                                                                                                                                                                                 |

| <b>Predictor</b> | <b>Measurements</b>                                                                                                                                                     | <b>Units and definitions</b> |
|------------------|-------------------------------------------------------------------------------------------------------------------------------------------------------------------------|------------------------------|
|                  | physical exercise in your spare time? (A=never or almost absent;<br>B=1-3 times/month; C=1-2 times/week; D=3-5 times/week;<br>E=exercise every day or almost every day) | Unit: MET-hour/day           |

**Method S4 ICD-10 of CLD events in CKB**

| <b>ICD-10</b> | <b>Diagnosis</b>                                                     | <b>No. cases</b> |
|---------------|----------------------------------------------------------------------|------------------|
| <b>HCC</b>    |                                                                      |                  |
| C22.0         | Liver cell carcinoma                                                 | 354              |
| C22.9         | Malignant neoplasm of liver and intrahepatic bile ducts, unspecified | 2,916            |
| <b>Total</b>  |                                                                      | <b>3,017</b>     |
| <b>CLD</b>    |                                                                      |                  |
| K70           | alcoholic liver disease, ALD                                         | 329              |
| K72.0         | Acute liver failure                                                  | 35               |
| K72.1         | Chronic liver failure                                                | 12               |
| K72.9         | Liver failure unspecified                                            | 251              |
| K74           | fibrosis and cirrhosis of liver                                      | 2,708            |
| K76.7         | Hepatorenal syndrome                                                 | 31               |
| I85.0         | Esophageal varices with bleeding                                     | 103              |
| I85.9         | Esophageal varices without bleeding                                  | 45               |
| C22           | Liver cancer                                                         | 3,268            |
| <b>Total</b>  |                                                                      | <b>5,565</b>     |

## Method S5 Predictors and equations for included models

| Predictors and equations for included models                                                                                                                                                                                                                                                                                                                                                                                                                                                                                                                                                                                                                                                                                                                                                                                                                                                                                                                                                                                                                                                                                                                                                                                           |                                                                                                                                                                                                                                                                                                                                                                                                                                                                                                                                                                                                                                                                                                                                                                                                                                                                                                                                                                                                                                                                                                                                                                                                                                                                                                                                                                                                                                                                                                                                                                                                                                                                                                                                                                                                                                                                                                                                                                                                                               |                       |                 |                               |  |                    |   |                        |   |                        |   |                        |   |                    |   |                                            |  |                |   |                    |   |                  |   |       |   |       |   |                   |  |                     |   |                      |   |                      |   |                      |   |                      |   |                                           |  |                    |   |                      |   |                      |   |                       |   |                      |   |                |  |                                     |   |                                      |   |                                 |   |                                |   |       |   |                            |  |     |   |    |   |                             |  |
|----------------------------------------------------------------------------------------------------------------------------------------------------------------------------------------------------------------------------------------------------------------------------------------------------------------------------------------------------------------------------------------------------------------------------------------------------------------------------------------------------------------------------------------------------------------------------------------------------------------------------------------------------------------------------------------------------------------------------------------------------------------------------------------------------------------------------------------------------------------------------------------------------------------------------------------------------------------------------------------------------------------------------------------------------------------------------------------------------------------------------------------------------------------------------------------------------------------------------------------|-------------------------------------------------------------------------------------------------------------------------------------------------------------------------------------------------------------------------------------------------------------------------------------------------------------------------------------------------------------------------------------------------------------------------------------------------------------------------------------------------------------------------------------------------------------------------------------------------------------------------------------------------------------------------------------------------------------------------------------------------------------------------------------------------------------------------------------------------------------------------------------------------------------------------------------------------------------------------------------------------------------------------------------------------------------------------------------------------------------------------------------------------------------------------------------------------------------------------------------------------------------------------------------------------------------------------------------------------------------------------------------------------------------------------------------------------------------------------------------------------------------------------------------------------------------------------------------------------------------------------------------------------------------------------------------------------------------------------------------------------------------------------------------------------------------------------------------------------------------------------------------------------------------------------------------------------------------------------------------------------------------------------------|-----------------------|-----------------|-------------------------------|--|--------------------|---|------------------------|---|------------------------|---|------------------------|---|--------------------|---|--------------------------------------------|--|----------------|---|--------------------|---|------------------|---|-------|---|-------|---|-------------------|--|---------------------|---|----------------------|---|----------------------|---|----------------------|---|----------------------|---|-------------------------------------------|--|--------------------|---|----------------------|---|----------------------|---|-----------------------|---|----------------------|---|----------------|--|-------------------------------------|---|--------------------------------------|---|---------------------------------|---|--------------------------------|---|-------|---|----------------------------|--|-----|---|----|---|-----------------------------|--|
| HCC                                                                                                                                                                                                                                                                                                                                                                                                                                                                                                                                                                                                                                                                                                                                                                                                                                                                                                                                                                                                                                                                                                                                                                                                                                    |                                                                                                                                                                                                                                                                                                                                                                                                                                                                                                                                                                                                                                                                                                                                                                                                                                                                                                                                                                                                                                                                                                                                                                                                                                                                                                                                                                                                                                                                                                                                                                                                                                                                                                                                                                                                                                                                                                                                                                                                                               |                       |                 |                               |  |                    |   |                        |   |                        |   |                        |   |                    |   |                                            |  |                |   |                    |   |                  |   |       |   |       |   |                   |  |                     |   |                      |   |                      |   |                      |   |                      |   |                                           |  |                    |   |                      |   |                      |   |                       |   |                      |   |                |  |                                     |   |                                      |   |                                 |   |                                |   |       |   |                            |  |     |   |    |   |                             |  |
| <b>1. HLI</b>                                                                                                                                                                                                                                                                                                                                                                                                                                                                                                                                                                                                                                                                                                                                                                                                                                                                                                                                                                                                                                                                                                                                                                                                                          |                                                                                                                                                                                                                                                                                                                                                                                                                                                                                                                                                                                                                                                                                                                                                                                                                                                                                                                                                                                                                                                                                                                                                                                                                                                                                                                                                                                                                                                                                                                                                                                                                                                                                                                                                                                                                                                                                                                                                                                                                               |                       |                 |                               |  |                    |   |                        |   |                        |   |                        |   |                    |   |                                            |  |                |   |                    |   |                  |   |       |   |       |   |                   |  |                     |   |                      |   |                      |   |                      |   |                      |   |                                           |  |                    |   |                      |   |                      |   |                       |   |                      |   |                |  |                                     |   |                                      |   |                                 |   |                                |   |       |   |                            |  |     |   |    |   |                             |  |
| (1) Predictors: BMI, lifetime alcohol consumption, diet score, physical activity, smoking, hepatitis infection, diabetes<br>Predictor definition: <ol style="list-style-type: none"> <li>BMI (continuous, kg/m<sup>2</sup>), average lifetime alcohol intake (continuous, grams per day).</li> <li>Diet score (The diet score combined six dietary items including cereal fiber, red and processed meats, ratio of polyunsaturated to saturated fatty acids, margarine (used as a surrogate marker for trans-fat from industrial sources), glycemic load, and fruits and vegetables. continuous).</li> <li>Physical activity (continuous metabolic equivalents of task in metabolic equivalent hours per week).</li> <li>Smoking (never, former smokers quit &gt;10 y, former smokers quit &lt;10 y, current smokers ≤15 cigarettes/d, current smokers &gt;15 cigarettes/d).</li> <li>Hepatitis infection (yes/no), and self-reported diabetes at baseline (yes/no). These are the components of an HLI used in EPIC, modified to include hepatitis and diabetes status.</li> <li>Average lifetime alcohol intake was used instead of alcohol intake at recruitment to address potential bias related to reverse causality.</li> </ol> |                                                                                                                                                                                                                                                                                                                                                                                                                                                                                                                                                                                                                                                                                                                                                                                                                                                                                                                                                                                                                                                                                                                                                                                                                                                                                                                                                                                                                                                                                                                                                                                                                                                                                                                                                                                                                                                                                                                                                                                                                               |                       |                 |                               |  |                    |   |                        |   |                        |   |                        |   |                    |   |                                            |  |                |   |                    |   |                  |   |       |   |       |   |                   |  |                     |   |                      |   |                      |   |                      |   |                      |   |                                           |  |                    |   |                      |   |                      |   |                       |   |                      |   |                |  |                                     |   |                                      |   |                                 |   |                                |   |       |   |                            |  |     |   |    |   |                             |  |
| (2) Equation:                                                                                                                                                                                                                                                                                                                                                                                                                                                                                                                                                                                                                                                                                                                                                                                                                                                                                                                                                                                                                                                                                                                                                                                                                          |                                                                                                                                                                                                                                                                                                                                                                                                                                                                                                                                                                                                                                                                                                                                                                                                                                                                                                                                                                                                                                                                                                                                                                                                                                                                                                                                                                                                                                                                                                                                                                                                                                                                                                                                                                                                                                                                                                                                                                                                                               |                       |                 |                               |  |                    |   |                        |   |                        |   |                        |   |                    |   |                                            |  |                |   |                    |   |                  |   |       |   |       |   |                   |  |                     |   |                      |   |                      |   |                      |   |                      |   |                                           |  |                    |   |                      |   |                      |   |                       |   |                      |   |                |  |                                     |   |                                      |   |                                 |   |                                |   |       |   |                            |  |     |   |    |   |                             |  |
|                                                                                                                                                                                                                                                                                                                                                                                                                                                                                                                                                                                                                                                                                                                                                                                                                                                                                                                                                                                                                                                                                                                                                                                                                                        | <table border="1"> <thead> <tr> <th>Modified HLI variable</th> <th>Scoring details</th> </tr> </thead> <tbody> <tr> <td colspan="2"><b>BMI (kg/m<sup>2</sup>)</b></td> </tr> <tr> <td>5th quintile (&lt;30)</td> <td>0</td> </tr> <tr> <td>4th quintile (26-29.9)</td> <td>1</td> </tr> <tr> <td>3rd quintile (24-25.9)</td> <td>2</td> </tr> <tr> <td>2nd quintile (22-23.9)</td> <td>3</td> </tr> <tr> <td>1st quintile (&lt;22)</td> <td>4</td> </tr> <tr> <td colspan="2"><b>Lifetime alcohol consumption(g/day)</b></td> </tr> <tr> <td>m: &gt;30; w: &gt;20</td> <td>0</td> </tr> <tr> <td>m: 15-30; w: 10-20</td> <td>1</td> </tr> <tr> <td>m: 5-15; w: 5-10</td> <td>2</td> </tr> <tr> <td>0.1-5</td> <td>3</td> </tr> <tr> <td>Never</td> <td>4</td> </tr> <tr> <td colspan="2"><b>Diet score</b></td> </tr> <tr> <td>1st quintile (6-21)</td> <td>0</td> </tr> <tr> <td>2nd quintile (22-25)</td> <td>1</td> </tr> <tr> <td>3rd quintile (26-28)</td> <td>2</td> </tr> <tr> <td>4th quintile (29-33)</td> <td>3</td> </tr> <tr> <td>5th quintile (34-46)</td> <td>4</td> </tr> <tr> <td colspan="2"><b>Physical activity (METs-hour/week)</b></td> </tr> <tr> <td>1st quintile (&lt;45)</td> <td>0</td> </tr> <tr> <td>2nd quintile (46-69)</td> <td>1</td> </tr> <tr> <td>3rd quintile (70-96)</td> <td>2</td> </tr> <tr> <td>4th quintile (97-133)</td> <td>3</td> </tr> <tr> <td>5th quintile (&gt;=134)</td> <td>4</td> </tr> <tr> <td colspan="2"><b>Smoking</b></td> </tr> <tr> <td>Current smokers, &gt;15 cigarettes/day</td> <td>0</td> </tr> <tr> <td>Current smokers, &lt;=15 cigarettes/day</td> <td>1</td> </tr> <tr> <td>Former smokers, quit &lt;=10 years</td> <td>2</td> </tr> <tr> <td>Former smokers, quit &gt;10 years</td> <td>3</td> </tr> <tr> <td>Never</td> <td>4</td> </tr> <tr> <td colspan="2"><b>Hepatitis Infection</b></td> </tr> <tr> <td>Yes</td> <td>0</td> </tr> <tr> <td>No</td> <td>4</td> </tr> <tr> <td colspan="2"><b>Diabetes at baseline</b></td> </tr> </tbody> </table> | Modified HLI variable | Scoring details | <b>BMI (kg/m<sup>2</sup>)</b> |  | 5th quintile (<30) | 0 | 4th quintile (26-29.9) | 1 | 3rd quintile (24-25.9) | 2 | 2nd quintile (22-23.9) | 3 | 1st quintile (<22) | 4 | <b>Lifetime alcohol consumption(g/day)</b> |  | m: >30; w: >20 | 0 | m: 15-30; w: 10-20 | 1 | m: 5-15; w: 5-10 | 2 | 0.1-5 | 3 | Never | 4 | <b>Diet score</b> |  | 1st quintile (6-21) | 0 | 2nd quintile (22-25) | 1 | 3rd quintile (26-28) | 2 | 4th quintile (29-33) | 3 | 5th quintile (34-46) | 4 | <b>Physical activity (METs-hour/week)</b> |  | 1st quintile (<45) | 0 | 2nd quintile (46-69) | 1 | 3rd quintile (70-96) | 2 | 4th quintile (97-133) | 3 | 5th quintile (>=134) | 4 | <b>Smoking</b> |  | Current smokers, >15 cigarettes/day | 0 | Current smokers, <=15 cigarettes/day | 1 | Former smokers, quit <=10 years | 2 | Former smokers, quit >10 years | 3 | Never | 4 | <b>Hepatitis Infection</b> |  | Yes | 0 | No | 4 | <b>Diabetes at baseline</b> |  |
| Modified HLI variable                                                                                                                                                                                                                                                                                                                                                                                                                                                                                                                                                                                                                                                                                                                                                                                                                                                                                                                                                                                                                                                                                                                                                                                                                  | Scoring details                                                                                                                                                                                                                                                                                                                                                                                                                                                                                                                                                                                                                                                                                                                                                                                                                                                                                                                                                                                                                                                                                                                                                                                                                                                                                                                                                                                                                                                                                                                                                                                                                                                                                                                                                                                                                                                                                                                                                                                                               |                       |                 |                               |  |                    |   |                        |   |                        |   |                        |   |                    |   |                                            |  |                |   |                    |   |                  |   |       |   |       |   |                   |  |                     |   |                      |   |                      |   |                      |   |                      |   |                                           |  |                    |   |                      |   |                      |   |                       |   |                      |   |                |  |                                     |   |                                      |   |                                 |   |                                |   |       |   |                            |  |     |   |    |   |                             |  |
| <b>BMI (kg/m<sup>2</sup>)</b>                                                                                                                                                                                                                                                                                                                                                                                                                                                                                                                                                                                                                                                                                                                                                                                                                                                                                                                                                                                                                                                                                                                                                                                                          |                                                                                                                                                                                                                                                                                                                                                                                                                                                                                                                                                                                                                                                                                                                                                                                                                                                                                                                                                                                                                                                                                                                                                                                                                                                                                                                                                                                                                                                                                                                                                                                                                                                                                                                                                                                                                                                                                                                                                                                                                               |                       |                 |                               |  |                    |   |                        |   |                        |   |                        |   |                    |   |                                            |  |                |   |                    |   |                  |   |       |   |       |   |                   |  |                     |   |                      |   |                      |   |                      |   |                      |   |                                           |  |                    |   |                      |   |                      |   |                       |   |                      |   |                |  |                                     |   |                                      |   |                                 |   |                                |   |       |   |                            |  |     |   |    |   |                             |  |
| 5th quintile (<30)                                                                                                                                                                                                                                                                                                                                                                                                                                                                                                                                                                                                                                                                                                                                                                                                                                                                                                                                                                                                                                                                                                                                                                                                                     | 0                                                                                                                                                                                                                                                                                                                                                                                                                                                                                                                                                                                                                                                                                                                                                                                                                                                                                                                                                                                                                                                                                                                                                                                                                                                                                                                                                                                                                                                                                                                                                                                                                                                                                                                                                                                                                                                                                                                                                                                                                             |                       |                 |                               |  |                    |   |                        |   |                        |   |                        |   |                    |   |                                            |  |                |   |                    |   |                  |   |       |   |       |   |                   |  |                     |   |                      |   |                      |   |                      |   |                      |   |                                           |  |                    |   |                      |   |                      |   |                       |   |                      |   |                |  |                                     |   |                                      |   |                                 |   |                                |   |       |   |                            |  |     |   |    |   |                             |  |
| 4th quintile (26-29.9)                                                                                                                                                                                                                                                                                                                                                                                                                                                                                                                                                                                                                                                                                                                                                                                                                                                                                                                                                                                                                                                                                                                                                                                                                 | 1                                                                                                                                                                                                                                                                                                                                                                                                                                                                                                                                                                                                                                                                                                                                                                                                                                                                                                                                                                                                                                                                                                                                                                                                                                                                                                                                                                                                                                                                                                                                                                                                                                                                                                                                                                                                                                                                                                                                                                                                                             |                       |                 |                               |  |                    |   |                        |   |                        |   |                        |   |                    |   |                                            |  |                |   |                    |   |                  |   |       |   |       |   |                   |  |                     |   |                      |   |                      |   |                      |   |                      |   |                                           |  |                    |   |                      |   |                      |   |                       |   |                      |   |                |  |                                     |   |                                      |   |                                 |   |                                |   |       |   |                            |  |     |   |    |   |                             |  |
| 3rd quintile (24-25.9)                                                                                                                                                                                                                                                                                                                                                                                                                                                                                                                                                                                                                                                                                                                                                                                                                                                                                                                                                                                                                                                                                                                                                                                                                 | 2                                                                                                                                                                                                                                                                                                                                                                                                                                                                                                                                                                                                                                                                                                                                                                                                                                                                                                                                                                                                                                                                                                                                                                                                                                                                                                                                                                                                                                                                                                                                                                                                                                                                                                                                                                                                                                                                                                                                                                                                                             |                       |                 |                               |  |                    |   |                        |   |                        |   |                        |   |                    |   |                                            |  |                |   |                    |   |                  |   |       |   |       |   |                   |  |                     |   |                      |   |                      |   |                      |   |                      |   |                                           |  |                    |   |                      |   |                      |   |                       |   |                      |   |                |  |                                     |   |                                      |   |                                 |   |                                |   |       |   |                            |  |     |   |    |   |                             |  |
| 2nd quintile (22-23.9)                                                                                                                                                                                                                                                                                                                                                                                                                                                                                                                                                                                                                                                                                                                                                                                                                                                                                                                                                                                                                                                                                                                                                                                                                 | 3                                                                                                                                                                                                                                                                                                                                                                                                                                                                                                                                                                                                                                                                                                                                                                                                                                                                                                                                                                                                                                                                                                                                                                                                                                                                                                                                                                                                                                                                                                                                                                                                                                                                                                                                                                                                                                                                                                                                                                                                                             |                       |                 |                               |  |                    |   |                        |   |                        |   |                        |   |                    |   |                                            |  |                |   |                    |   |                  |   |       |   |       |   |                   |  |                     |   |                      |   |                      |   |                      |   |                      |   |                                           |  |                    |   |                      |   |                      |   |                       |   |                      |   |                |  |                                     |   |                                      |   |                                 |   |                                |   |       |   |                            |  |     |   |    |   |                             |  |
| 1st quintile (<22)                                                                                                                                                                                                                                                                                                                                                                                                                                                                                                                                                                                                                                                                                                                                                                                                                                                                                                                                                                                                                                                                                                                                                                                                                     | 4                                                                                                                                                                                                                                                                                                                                                                                                                                                                                                                                                                                                                                                                                                                                                                                                                                                                                                                                                                                                                                                                                                                                                                                                                                                                                                                                                                                                                                                                                                                                                                                                                                                                                                                                                                                                                                                                                                                                                                                                                             |                       |                 |                               |  |                    |   |                        |   |                        |   |                        |   |                    |   |                                            |  |                |   |                    |   |                  |   |       |   |       |   |                   |  |                     |   |                      |   |                      |   |                      |   |                      |   |                                           |  |                    |   |                      |   |                      |   |                       |   |                      |   |                |  |                                     |   |                                      |   |                                 |   |                                |   |       |   |                            |  |     |   |    |   |                             |  |
| <b>Lifetime alcohol consumption(g/day)</b>                                                                                                                                                                                                                                                                                                                                                                                                                                                                                                                                                                                                                                                                                                                                                                                                                                                                                                                                                                                                                                                                                                                                                                                             |                                                                                                                                                                                                                                                                                                                                                                                                                                                                                                                                                                                                                                                                                                                                                                                                                                                                                                                                                                                                                                                                                                                                                                                                                                                                                                                                                                                                                                                                                                                                                                                                                                                                                                                                                                                                                                                                                                                                                                                                                               |                       |                 |                               |  |                    |   |                        |   |                        |   |                        |   |                    |   |                                            |  |                |   |                    |   |                  |   |       |   |       |   |                   |  |                     |   |                      |   |                      |   |                      |   |                      |   |                                           |  |                    |   |                      |   |                      |   |                       |   |                      |   |                |  |                                     |   |                                      |   |                                 |   |                                |   |       |   |                            |  |     |   |    |   |                             |  |
| m: >30; w: >20                                                                                                                                                                                                                                                                                                                                                                                                                                                                                                                                                                                                                                                                                                                                                                                                                                                                                                                                                                                                                                                                                                                                                                                                                         | 0                                                                                                                                                                                                                                                                                                                                                                                                                                                                                                                                                                                                                                                                                                                                                                                                                                                                                                                                                                                                                                                                                                                                                                                                                                                                                                                                                                                                                                                                                                                                                                                                                                                                                                                                                                                                                                                                                                                                                                                                                             |                       |                 |                               |  |                    |   |                        |   |                        |   |                        |   |                    |   |                                            |  |                |   |                    |   |                  |   |       |   |       |   |                   |  |                     |   |                      |   |                      |   |                      |   |                      |   |                                           |  |                    |   |                      |   |                      |   |                       |   |                      |   |                |  |                                     |   |                                      |   |                                 |   |                                |   |       |   |                            |  |     |   |    |   |                             |  |
| m: 15-30; w: 10-20                                                                                                                                                                                                                                                                                                                                                                                                                                                                                                                                                                                                                                                                                                                                                                                                                                                                                                                                                                                                                                                                                                                                                                                                                     | 1                                                                                                                                                                                                                                                                                                                                                                                                                                                                                                                                                                                                                                                                                                                                                                                                                                                                                                                                                                                                                                                                                                                                                                                                                                                                                                                                                                                                                                                                                                                                                                                                                                                                                                                                                                                                                                                                                                                                                                                                                             |                       |                 |                               |  |                    |   |                        |   |                        |   |                        |   |                    |   |                                            |  |                |   |                    |   |                  |   |       |   |       |   |                   |  |                     |   |                      |   |                      |   |                      |   |                      |   |                                           |  |                    |   |                      |   |                      |   |                       |   |                      |   |                |  |                                     |   |                                      |   |                                 |   |                                |   |       |   |                            |  |     |   |    |   |                             |  |
| m: 5-15; w: 5-10                                                                                                                                                                                                                                                                                                                                                                                                                                                                                                                                                                                                                                                                                                                                                                                                                                                                                                                                                                                                                                                                                                                                                                                                                       | 2                                                                                                                                                                                                                                                                                                                                                                                                                                                                                                                                                                                                                                                                                                                                                                                                                                                                                                                                                                                                                                                                                                                                                                                                                                                                                                                                                                                                                                                                                                                                                                                                                                                                                                                                                                                                                                                                                                                                                                                                                             |                       |                 |                               |  |                    |   |                        |   |                        |   |                        |   |                    |   |                                            |  |                |   |                    |   |                  |   |       |   |       |   |                   |  |                     |   |                      |   |                      |   |                      |   |                      |   |                                           |  |                    |   |                      |   |                      |   |                       |   |                      |   |                |  |                                     |   |                                      |   |                                 |   |                                |   |       |   |                            |  |     |   |    |   |                             |  |
| 0.1-5                                                                                                                                                                                                                                                                                                                                                                                                                                                                                                                                                                                                                                                                                                                                                                                                                                                                                                                                                                                                                                                                                                                                                                                                                                  | 3                                                                                                                                                                                                                                                                                                                                                                                                                                                                                                                                                                                                                                                                                                                                                                                                                                                                                                                                                                                                                                                                                                                                                                                                                                                                                                                                                                                                                                                                                                                                                                                                                                                                                                                                                                                                                                                                                                                                                                                                                             |                       |                 |                               |  |                    |   |                        |   |                        |   |                        |   |                    |   |                                            |  |                |   |                    |   |                  |   |       |   |       |   |                   |  |                     |   |                      |   |                      |   |                      |   |                      |   |                                           |  |                    |   |                      |   |                      |   |                       |   |                      |   |                |  |                                     |   |                                      |   |                                 |   |                                |   |       |   |                            |  |     |   |    |   |                             |  |
| Never                                                                                                                                                                                                                                                                                                                                                                                                                                                                                                                                                                                                                                                                                                                                                                                                                                                                                                                                                                                                                                                                                                                                                                                                                                  | 4                                                                                                                                                                                                                                                                                                                                                                                                                                                                                                                                                                                                                                                                                                                                                                                                                                                                                                                                                                                                                                                                                                                                                                                                                                                                                                                                                                                                                                                                                                                                                                                                                                                                                                                                                                                                                                                                                                                                                                                                                             |                       |                 |                               |  |                    |   |                        |   |                        |   |                        |   |                    |   |                                            |  |                |   |                    |   |                  |   |       |   |       |   |                   |  |                     |   |                      |   |                      |   |                      |   |                      |   |                                           |  |                    |   |                      |   |                      |   |                       |   |                      |   |                |  |                                     |   |                                      |   |                                 |   |                                |   |       |   |                            |  |     |   |    |   |                             |  |
| <b>Diet score</b>                                                                                                                                                                                                                                                                                                                                                                                                                                                                                                                                                                                                                                                                                                                                                                                                                                                                                                                                                                                                                                                                                                                                                                                                                      |                                                                                                                                                                                                                                                                                                                                                                                                                                                                                                                                                                                                                                                                                                                                                                                                                                                                                                                                                                                                                                                                                                                                                                                                                                                                                                                                                                                                                                                                                                                                                                                                                                                                                                                                                                                                                                                                                                                                                                                                                               |                       |                 |                               |  |                    |   |                        |   |                        |   |                        |   |                    |   |                                            |  |                |   |                    |   |                  |   |       |   |       |   |                   |  |                     |   |                      |   |                      |   |                      |   |                      |   |                                           |  |                    |   |                      |   |                      |   |                       |   |                      |   |                |  |                                     |   |                                      |   |                                 |   |                                |   |       |   |                            |  |     |   |    |   |                             |  |
| 1st quintile (6-21)                                                                                                                                                                                                                                                                                                                                                                                                                                                                                                                                                                                                                                                                                                                                                                                                                                                                                                                                                                                                                                                                                                                                                                                                                    | 0                                                                                                                                                                                                                                                                                                                                                                                                                                                                                                                                                                                                                                                                                                                                                                                                                                                                                                                                                                                                                                                                                                                                                                                                                                                                                                                                                                                                                                                                                                                                                                                                                                                                                                                                                                                                                                                                                                                                                                                                                             |                       |                 |                               |  |                    |   |                        |   |                        |   |                        |   |                    |   |                                            |  |                |   |                    |   |                  |   |       |   |       |   |                   |  |                     |   |                      |   |                      |   |                      |   |                      |   |                                           |  |                    |   |                      |   |                      |   |                       |   |                      |   |                |  |                                     |   |                                      |   |                                 |   |                                |   |       |   |                            |  |     |   |    |   |                             |  |
| 2nd quintile (22-25)                                                                                                                                                                                                                                                                                                                                                                                                                                                                                                                                                                                                                                                                                                                                                                                                                                                                                                                                                                                                                                                                                                                                                                                                                   | 1                                                                                                                                                                                                                                                                                                                                                                                                                                                                                                                                                                                                                                                                                                                                                                                                                                                                                                                                                                                                                                                                                                                                                                                                                                                                                                                                                                                                                                                                                                                                                                                                                                                                                                                                                                                                                                                                                                                                                                                                                             |                       |                 |                               |  |                    |   |                        |   |                        |   |                        |   |                    |   |                                            |  |                |   |                    |   |                  |   |       |   |       |   |                   |  |                     |   |                      |   |                      |   |                      |   |                      |   |                                           |  |                    |   |                      |   |                      |   |                       |   |                      |   |                |  |                                     |   |                                      |   |                                 |   |                                |   |       |   |                            |  |     |   |    |   |                             |  |
| 3rd quintile (26-28)                                                                                                                                                                                                                                                                                                                                                                                                                                                                                                                                                                                                                                                                                                                                                                                                                                                                                                                                                                                                                                                                                                                                                                                                                   | 2                                                                                                                                                                                                                                                                                                                                                                                                                                                                                                                                                                                                                                                                                                                                                                                                                                                                                                                                                                                                                                                                                                                                                                                                                                                                                                                                                                                                                                                                                                                                                                                                                                                                                                                                                                                                                                                                                                                                                                                                                             |                       |                 |                               |  |                    |   |                        |   |                        |   |                        |   |                    |   |                                            |  |                |   |                    |   |                  |   |       |   |       |   |                   |  |                     |   |                      |   |                      |   |                      |   |                      |   |                                           |  |                    |   |                      |   |                      |   |                       |   |                      |   |                |  |                                     |   |                                      |   |                                 |   |                                |   |       |   |                            |  |     |   |    |   |                             |  |
| 4th quintile (29-33)                                                                                                                                                                                                                                                                                                                                                                                                                                                                                                                                                                                                                                                                                                                                                                                                                                                                                                                                                                                                                                                                                                                                                                                                                   | 3                                                                                                                                                                                                                                                                                                                                                                                                                                                                                                                                                                                                                                                                                                                                                                                                                                                                                                                                                                                                                                                                                                                                                                                                                                                                                                                                                                                                                                                                                                                                                                                                                                                                                                                                                                                                                                                                                                                                                                                                                             |                       |                 |                               |  |                    |   |                        |   |                        |   |                        |   |                    |   |                                            |  |                |   |                    |   |                  |   |       |   |       |   |                   |  |                     |   |                      |   |                      |   |                      |   |                      |   |                                           |  |                    |   |                      |   |                      |   |                       |   |                      |   |                |  |                                     |   |                                      |   |                                 |   |                                |   |       |   |                            |  |     |   |    |   |                             |  |
| 5th quintile (34-46)                                                                                                                                                                                                                                                                                                                                                                                                                                                                                                                                                                                                                                                                                                                                                                                                                                                                                                                                                                                                                                                                                                                                                                                                                   | 4                                                                                                                                                                                                                                                                                                                                                                                                                                                                                                                                                                                                                                                                                                                                                                                                                                                                                                                                                                                                                                                                                                                                                                                                                                                                                                                                                                                                                                                                                                                                                                                                                                                                                                                                                                                                                                                                                                                                                                                                                             |                       |                 |                               |  |                    |   |                        |   |                        |   |                        |   |                    |   |                                            |  |                |   |                    |   |                  |   |       |   |       |   |                   |  |                     |   |                      |   |                      |   |                      |   |                      |   |                                           |  |                    |   |                      |   |                      |   |                       |   |                      |   |                |  |                                     |   |                                      |   |                                 |   |                                |   |       |   |                            |  |     |   |    |   |                             |  |
| <b>Physical activity (METs-hour/week)</b>                                                                                                                                                                                                                                                                                                                                                                                                                                                                                                                                                                                                                                                                                                                                                                                                                                                                                                                                                                                                                                                                                                                                                                                              |                                                                                                                                                                                                                                                                                                                                                                                                                                                                                                                                                                                                                                                                                                                                                                                                                                                                                                                                                                                                                                                                                                                                                                                                                                                                                                                                                                                                                                                                                                                                                                                                                                                                                                                                                                                                                                                                                                                                                                                                                               |                       |                 |                               |  |                    |   |                        |   |                        |   |                        |   |                    |   |                                            |  |                |   |                    |   |                  |   |       |   |       |   |                   |  |                     |   |                      |   |                      |   |                      |   |                      |   |                                           |  |                    |   |                      |   |                      |   |                       |   |                      |   |                |  |                                     |   |                                      |   |                                 |   |                                |   |       |   |                            |  |     |   |    |   |                             |  |
| 1st quintile (<45)                                                                                                                                                                                                                                                                                                                                                                                                                                                                                                                                                                                                                                                                                                                                                                                                                                                                                                                                                                                                                                                                                                                                                                                                                     | 0                                                                                                                                                                                                                                                                                                                                                                                                                                                                                                                                                                                                                                                                                                                                                                                                                                                                                                                                                                                                                                                                                                                                                                                                                                                                                                                                                                                                                                                                                                                                                                                                                                                                                                                                                                                                                                                                                                                                                                                                                             |                       |                 |                               |  |                    |   |                        |   |                        |   |                        |   |                    |   |                                            |  |                |   |                    |   |                  |   |       |   |       |   |                   |  |                     |   |                      |   |                      |   |                      |   |                      |   |                                           |  |                    |   |                      |   |                      |   |                       |   |                      |   |                |  |                                     |   |                                      |   |                                 |   |                                |   |       |   |                            |  |     |   |    |   |                             |  |
| 2nd quintile (46-69)                                                                                                                                                                                                                                                                                                                                                                                                                                                                                                                                                                                                                                                                                                                                                                                                                                                                                                                                                                                                                                                                                                                                                                                                                   | 1                                                                                                                                                                                                                                                                                                                                                                                                                                                                                                                                                                                                                                                                                                                                                                                                                                                                                                                                                                                                                                                                                                                                                                                                                                                                                                                                                                                                                                                                                                                                                                                                                                                                                                                                                                                                                                                                                                                                                                                                                             |                       |                 |                               |  |                    |   |                        |   |                        |   |                        |   |                    |   |                                            |  |                |   |                    |   |                  |   |       |   |       |   |                   |  |                     |   |                      |   |                      |   |                      |   |                      |   |                                           |  |                    |   |                      |   |                      |   |                       |   |                      |   |                |  |                                     |   |                                      |   |                                 |   |                                |   |       |   |                            |  |     |   |    |   |                             |  |
| 3rd quintile (70-96)                                                                                                                                                                                                                                                                                                                                                                                                                                                                                                                                                                                                                                                                                                                                                                                                                                                                                                                                                                                                                                                                                                                                                                                                                   | 2                                                                                                                                                                                                                                                                                                                                                                                                                                                                                                                                                                                                                                                                                                                                                                                                                                                                                                                                                                                                                                                                                                                                                                                                                                                                                                                                                                                                                                                                                                                                                                                                                                                                                                                                                                                                                                                                                                                                                                                                                             |                       |                 |                               |  |                    |   |                        |   |                        |   |                        |   |                    |   |                                            |  |                |   |                    |   |                  |   |       |   |       |   |                   |  |                     |   |                      |   |                      |   |                      |   |                      |   |                                           |  |                    |   |                      |   |                      |   |                       |   |                      |   |                |  |                                     |   |                                      |   |                                 |   |                                |   |       |   |                            |  |     |   |    |   |                             |  |
| 4th quintile (97-133)                                                                                                                                                                                                                                                                                                                                                                                                                                                                                                                                                                                                                                                                                                                                                                                                                                                                                                                                                                                                                                                                                                                                                                                                                  | 3                                                                                                                                                                                                                                                                                                                                                                                                                                                                                                                                                                                                                                                                                                                                                                                                                                                                                                                                                                                                                                                                                                                                                                                                                                                                                                                                                                                                                                                                                                                                                                                                                                                                                                                                                                                                                                                                                                                                                                                                                             |                       |                 |                               |  |                    |   |                        |   |                        |   |                        |   |                    |   |                                            |  |                |   |                    |   |                  |   |       |   |       |   |                   |  |                     |   |                      |   |                      |   |                      |   |                      |   |                                           |  |                    |   |                      |   |                      |   |                       |   |                      |   |                |  |                                     |   |                                      |   |                                 |   |                                |   |       |   |                            |  |     |   |    |   |                             |  |
| 5th quintile (>=134)                                                                                                                                                                                                                                                                                                                                                                                                                                                                                                                                                                                                                                                                                                                                                                                                                                                                                                                                                                                                                                                                                                                                                                                                                   | 4                                                                                                                                                                                                                                                                                                                                                                                                                                                                                                                                                                                                                                                                                                                                                                                                                                                                                                                                                                                                                                                                                                                                                                                                                                                                                                                                                                                                                                                                                                                                                                                                                                                                                                                                                                                                                                                                                                                                                                                                                             |                       |                 |                               |  |                    |   |                        |   |                        |   |                        |   |                    |   |                                            |  |                |   |                    |   |                  |   |       |   |       |   |                   |  |                     |   |                      |   |                      |   |                      |   |                      |   |                                           |  |                    |   |                      |   |                      |   |                       |   |                      |   |                |  |                                     |   |                                      |   |                                 |   |                                |   |       |   |                            |  |     |   |    |   |                             |  |
| <b>Smoking</b>                                                                                                                                                                                                                                                                                                                                                                                                                                                                                                                                                                                                                                                                                                                                                                                                                                                                                                                                                                                                                                                                                                                                                                                                                         |                                                                                                                                                                                                                                                                                                                                                                                                                                                                                                                                                                                                                                                                                                                                                                                                                                                                                                                                                                                                                                                                                                                                                                                                                                                                                                                                                                                                                                                                                                                                                                                                                                                                                                                                                                                                                                                                                                                                                                                                                               |                       |                 |                               |  |                    |   |                        |   |                        |   |                        |   |                    |   |                                            |  |                |   |                    |   |                  |   |       |   |       |   |                   |  |                     |   |                      |   |                      |   |                      |   |                      |   |                                           |  |                    |   |                      |   |                      |   |                       |   |                      |   |                |  |                                     |   |                                      |   |                                 |   |                                |   |       |   |                            |  |     |   |    |   |                             |  |
| Current smokers, >15 cigarettes/day                                                                                                                                                                                                                                                                                                                                                                                                                                                                                                                                                                                                                                                                                                                                                                                                                                                                                                                                                                                                                                                                                                                                                                                                    | 0                                                                                                                                                                                                                                                                                                                                                                                                                                                                                                                                                                                                                                                                                                                                                                                                                                                                                                                                                                                                                                                                                                                                                                                                                                                                                                                                                                                                                                                                                                                                                                                                                                                                                                                                                                                                                                                                                                                                                                                                                             |                       |                 |                               |  |                    |   |                        |   |                        |   |                        |   |                    |   |                                            |  |                |   |                    |   |                  |   |       |   |       |   |                   |  |                     |   |                      |   |                      |   |                      |   |                      |   |                                           |  |                    |   |                      |   |                      |   |                       |   |                      |   |                |  |                                     |   |                                      |   |                                 |   |                                |   |       |   |                            |  |     |   |    |   |                             |  |
| Current smokers, <=15 cigarettes/day                                                                                                                                                                                                                                                                                                                                                                                                                                                                                                                                                                                                                                                                                                                                                                                                                                                                                                                                                                                                                                                                                                                                                                                                   | 1                                                                                                                                                                                                                                                                                                                                                                                                                                                                                                                                                                                                                                                                                                                                                                                                                                                                                                                                                                                                                                                                                                                                                                                                                                                                                                                                                                                                                                                                                                                                                                                                                                                                                                                                                                                                                                                                                                                                                                                                                             |                       |                 |                               |  |                    |   |                        |   |                        |   |                        |   |                    |   |                                            |  |                |   |                    |   |                  |   |       |   |       |   |                   |  |                     |   |                      |   |                      |   |                      |   |                      |   |                                           |  |                    |   |                      |   |                      |   |                       |   |                      |   |                |  |                                     |   |                                      |   |                                 |   |                                |   |       |   |                            |  |     |   |    |   |                             |  |
| Former smokers, quit <=10 years                                                                                                                                                                                                                                                                                                                                                                                                                                                                                                                                                                                                                                                                                                                                                                                                                                                                                                                                                                                                                                                                                                                                                                                                        | 2                                                                                                                                                                                                                                                                                                                                                                                                                                                                                                                                                                                                                                                                                                                                                                                                                                                                                                                                                                                                                                                                                                                                                                                                                                                                                                                                                                                                                                                                                                                                                                                                                                                                                                                                                                                                                                                                                                                                                                                                                             |                       |                 |                               |  |                    |   |                        |   |                        |   |                        |   |                    |   |                                            |  |                |   |                    |   |                  |   |       |   |       |   |                   |  |                     |   |                      |   |                      |   |                      |   |                      |   |                                           |  |                    |   |                      |   |                      |   |                       |   |                      |   |                |  |                                     |   |                                      |   |                                 |   |                                |   |       |   |                            |  |     |   |    |   |                             |  |
| Former smokers, quit >10 years                                                                                                                                                                                                                                                                                                                                                                                                                                                                                                                                                                                                                                                                                                                                                                                                                                                                                                                                                                                                                                                                                                                                                                                                         | 3                                                                                                                                                                                                                                                                                                                                                                                                                                                                                                                                                                                                                                                                                                                                                                                                                                                                                                                                                                                                                                                                                                                                                                                                                                                                                                                                                                                                                                                                                                                                                                                                                                                                                                                                                                                                                                                                                                                                                                                                                             |                       |                 |                               |  |                    |   |                        |   |                        |   |                        |   |                    |   |                                            |  |                |   |                    |   |                  |   |       |   |       |   |                   |  |                     |   |                      |   |                      |   |                      |   |                      |   |                                           |  |                    |   |                      |   |                      |   |                       |   |                      |   |                |  |                                     |   |                                      |   |                                 |   |                                |   |       |   |                            |  |     |   |    |   |                             |  |
| Never                                                                                                                                                                                                                                                                                                                                                                                                                                                                                                                                                                                                                                                                                                                                                                                                                                                                                                                                                                                                                                                                                                                                                                                                                                  | 4                                                                                                                                                                                                                                                                                                                                                                                                                                                                                                                                                                                                                                                                                                                                                                                                                                                                                                                                                                                                                                                                                                                                                                                                                                                                                                                                                                                                                                                                                                                                                                                                                                                                                                                                                                                                                                                                                                                                                                                                                             |                       |                 |                               |  |                    |   |                        |   |                        |   |                        |   |                    |   |                                            |  |                |   |                    |   |                  |   |       |   |       |   |                   |  |                     |   |                      |   |                      |   |                      |   |                      |   |                                           |  |                    |   |                      |   |                      |   |                       |   |                      |   |                |  |                                     |   |                                      |   |                                 |   |                                |   |       |   |                            |  |     |   |    |   |                             |  |
| <b>Hepatitis Infection</b>                                                                                                                                                                                                                                                                                                                                                                                                                                                                                                                                                                                                                                                                                                                                                                                                                                                                                                                                                                                                                                                                                                                                                                                                             |                                                                                                                                                                                                                                                                                                                                                                                                                                                                                                                                                                                                                                                                                                                                                                                                                                                                                                                                                                                                                                                                                                                                                                                                                                                                                                                                                                                                                                                                                                                                                                                                                                                                                                                                                                                                                                                                                                                                                                                                                               |                       |                 |                               |  |                    |   |                        |   |                        |   |                        |   |                    |   |                                            |  |                |   |                    |   |                  |   |       |   |       |   |                   |  |                     |   |                      |   |                      |   |                      |   |                      |   |                                           |  |                    |   |                      |   |                      |   |                       |   |                      |   |                |  |                                     |   |                                      |   |                                 |   |                                |   |       |   |                            |  |     |   |    |   |                             |  |
| Yes                                                                                                                                                                                                                                                                                                                                                                                                                                                                                                                                                                                                                                                                                                                                                                                                                                                                                                                                                                                                                                                                                                                                                                                                                                    | 0                                                                                                                                                                                                                                                                                                                                                                                                                                                                                                                                                                                                                                                                                                                                                                                                                                                                                                                                                                                                                                                                                                                                                                                                                                                                                                                                                                                                                                                                                                                                                                                                                                                                                                                                                                                                                                                                                                                                                                                                                             |                       |                 |                               |  |                    |   |                        |   |                        |   |                        |   |                    |   |                                            |  |                |   |                    |   |                  |   |       |   |       |   |                   |  |                     |   |                      |   |                      |   |                      |   |                      |   |                                           |  |                    |   |                      |   |                      |   |                       |   |                      |   |                |  |                                     |   |                                      |   |                                 |   |                                |   |       |   |                            |  |     |   |    |   |                             |  |
| No                                                                                                                                                                                                                                                                                                                                                                                                                                                                                                                                                                                                                                                                                                                                                                                                                                                                                                                                                                                                                                                                                                                                                                                                                                     | 4                                                                                                                                                                                                                                                                                                                                                                                                                                                                                                                                                                                                                                                                                                                                                                                                                                                                                                                                                                                                                                                                                                                                                                                                                                                                                                                                                                                                                                                                                                                                                                                                                                                                                                                                                                                                                                                                                                                                                                                                                             |                       |                 |                               |  |                    |   |                        |   |                        |   |                        |   |                    |   |                                            |  |                |   |                    |   |                  |   |       |   |       |   |                   |  |                     |   |                      |   |                      |   |                      |   |                      |   |                                           |  |                    |   |                      |   |                      |   |                       |   |                      |   |                |  |                                     |   |                                      |   |                                 |   |                                |   |       |   |                            |  |     |   |    |   |                             |  |
| <b>Diabetes at baseline</b>                                                                                                                                                                                                                                                                                                                                                                                                                                                                                                                                                                                                                                                                                                                                                                                                                                                                                                                                                                                                                                                                                                                                                                                                            |                                                                                                                                                                                                                                                                                                                                                                                                                                                                                                                                                                                                                                                                                                                                                                                                                                                                                                                                                                                                                                                                                                                                                                                                                                                                                                                                                                                                                                                                                                                                                                                                                                                                                                                                                                                                                                                                                                                                                                                                                               |                       |                 |                               |  |                    |   |                        |   |                        |   |                        |   |                    |   |                                            |  |                |   |                    |   |                  |   |       |   |       |   |                   |  |                     |   |                      |   |                      |   |                      |   |                      |   |                                           |  |                    |   |                      |   |                      |   |                       |   |                      |   |                |  |                                     |   |                                      |   |                                 |   |                                |   |       |   |                            |  |     |   |    |   |                             |  |

|                                                                                                                                                                                                                                                                                                                                                                                                                                                                                                                                                                                                                                                                                                                                                                                                                                                                   |                        |
|-------------------------------------------------------------------------------------------------------------------------------------------------------------------------------------------------------------------------------------------------------------------------------------------------------------------------------------------------------------------------------------------------------------------------------------------------------------------------------------------------------------------------------------------------------------------------------------------------------------------------------------------------------------------------------------------------------------------------------------------------------------------------------------------------------------------------------------------------------------------|------------------------|
| Yes                                                                                                                                                                                                                                                                                                                                                                                                                                                                                                                                                                                                                                                                                                                                                                                                                                                               | 0                      |
| No                                                                                                                                                                                                                                                                                                                                                                                                                                                                                                                                                                                                                                                                                                                                                                                                                                                                | 4                      |
| (4) Equation in CKB:<br>$3.9369385 + 0.081874441 * \text{bmi}_q$<br>$-0.19685988 * \text{pa}_q$<br>$-0.097734815 * \text{fruit}$<br>$-0.22615716 * \text{cig\_category}$<br>$-0.047279255 * \text{alcohol\_cat}$<br>$-0.55157654 * \text{hepatitis}$<br>$-0.16193887 * \text{diabetes}$                                                                                                                                                                                                                                                                                                                                                                                                                                                                                                                                                                           |                        |
| <b>2.1 Wen 1-2012</b>                                                                                                                                                                                                                                                                                                                                                                                                                                                                                                                                                                                                                                                                                                                                                                                                                                             |                        |
| (1) Predictors: sex, age, smoking, drinking, physical activity, diabetes<br>Predictor definition:<br>a. Smoking was classified by the number of pack-years (i.e. daily cigarette quantity*duration in years) among every smoker.<br>b. Alcohol consumption was classified into "regular drinkers" (those who consumed $\geq 2$ drinks/day on $\geq 3$ days/week) and "occasional drinkers" (those who consumed $< 2$ drinks/day on $< 3$ days/week).<br>c. Physical activity: regarding volume of leisure time physical activity (LTPA) (i.e. the product of intensity measured as metabolic equivalent tasks [MET]*duration of exercise in hours), the MET-hour per week of each individual was classified as: inactive ( $< 3.75$ MET-hour), low-active (3.75-7.49 MET-hour), and active ( $\geq 7.5$ MET-hour; this group met the current LTPA recommendation) |                        |
| (2) Equation:                                                                                                                                                                                                                                                                                                                                                                                                                                                                                                                                                                                                                                                                                                                                                                                                                                                     |                        |
| <b>Wen 1-2012 variable</b>                                                                                                                                                                                                                                                                                                                                                                                                                                                                                                                                                                                                                                                                                                                                                                                                                                        | <b>Scoring details</b> |
| <b>Sex</b>                                                                                                                                                                                                                                                                                                                                                                                                                                                                                                                                                                                                                                                                                                                                                                                                                                                        |                        |
| Female                                                                                                                                                                                                                                                                                                                                                                                                                                                                                                                                                                                                                                                                                                                                                                                                                                                            | 0                      |
| Male                                                                                                                                                                                                                                                                                                                                                                                                                                                                                                                                                                                                                                                                                                                                                                                                                                                              | 2                      |
| <b>Age, year</b>                                                                                                                                                                                                                                                                                                                                                                                                                                                                                                                                                                                                                                                                                                                                                                                                                                                  |                        |
| 20-39                                                                                                                                                                                                                                                                                                                                                                                                                                                                                                                                                                                                                                                                                                                                                                                                                                                             | 0                      |
| 40-59                                                                                                                                                                                                                                                                                                                                                                                                                                                                                                                                                                                                                                                                                                                                                                                                                                                             | 2                      |
| $\geq 60$                                                                                                                                                                                                                                                                                                                                                                                                                                                                                                                                                                                                                                                                                                                                                                                                                                                         | 6                      |
| <b>Smoking, pack-years</b>                                                                                                                                                                                                                                                                                                                                                                                                                                                                                                                                                                                                                                                                                                                                                                                                                                        |                        |
| 0                                                                                                                                                                                                                                                                                                                                                                                                                                                                                                                                                                                                                                                                                                                                                                                                                                                                 | 0                      |
| 1-9.9                                                                                                                                                                                                                                                                                                                                                                                                                                                                                                                                                                                                                                                                                                                                                                                                                                                             | 1                      |
| $\geq 10$                                                                                                                                                                                                                                                                                                                                                                                                                                                                                                                                                                                                                                                                                                                                                                                                                                                         | 1                      |
| <b>Drinking</b>                                                                                                                                                                                                                                                                                                                                                                                                                                                                                                                                                                                                                                                                                                                                                                                                                                                   |                        |
| None or occasional                                                                                                                                                                                                                                                                                                                                                                                                                                                                                                                                                                                                                                                                                                                                                                                                                                                | 0                      |
| Regular                                                                                                                                                                                                                                                                                                                                                                                                                                                                                                                                                                                                                                                                                                                                                                                                                                                           | 1                      |
| <b>Physical Activity, MET-hour</b>                                                                                                                                                                                                                                                                                                                                                                                                                                                                                                                                                                                                                                                                                                                                                                                                                                |                        |
| $< 3.75$                                                                                                                                                                                                                                                                                                                                                                                                                                                                                                                                                                                                                                                                                                                                                                                                                                                          | 0                      |
| 3.75-7.49                                                                                                                                                                                                                                                                                                                                                                                                                                                                                                                                                                                                                                                                                                                                                                                                                                                         | -1                     |
| $\geq 7.5$                                                                                                                                                                                                                                                                                                                                                                                                                                                                                                                                                                                                                                                                                                                                                                                                                                                        | -1                     |
| Diabetes                                                                                                                                                                                                                                                                                                                                                                                                                                                                                                                                                                                                                                                                                                                                                                                                                                                          |                        |
| No                                                                                                                                                                                                                                                                                                                                                                                                                                                                                                                                                                                                                                                                                                                                                                                                                                                                | 0                      |
| Yes                                                                                                                                                                                                                                                                                                                                                                                                                                                                                                                                                                                                                                                                                                                                                                                                                                                               | 2                      |
| (3) Equation in CKB:<br>$-1.0610638 + 0.24293881 * \text{data}\$age\_category$<br>$+0.31523732 * \text{data}\$sex$<br>$+0.096166441 * \text{data}\$alc\_category$<br>$+0.17316124 * \text{data}\$act\_category$<br>$+0.47848429 * \text{data}\$diabetes$<br>$+0.37469387 * \text{data}\$cig\_category$                                                                                                                                                                                                                                                                                                                                                                                                                                                                                                                                                            |                        |
| <b>2.2 Wen 2-2012</b>                                                                                                                                                                                                                                                                                                                                                                                                                                                                                                                                                                                                                                                                                                                                                                                                                                             |                        |
| (1) Predictors: sex, age, AST, ALT                                                                                                                                                                                                                                                                                                                                                                                                                                                                                                                                                                                                                                                                                                                                                                                                                                |                        |
| (2) Equation:                                                                                                                                                                                                                                                                                                                                                                                                                                                                                                                                                                                                                                                                                                                                                                                                                                                     |                        |
| <b>Wen 2-2012 variable</b>                                                                                                                                                                                                                                                                                                                                                                                                                                                                                                                                                                                                                                                                                                                                                                                                                                        | <b>Scoring details</b> |
| <b>Sex</b>                                                                                                                                                                                                                                                                                                                                                                                                                                                                                                                                                                                                                                                                                                                                                                                                                                                        |                        |
| Female                                                                                                                                                                                                                                                                                                                                                                                                                                                                                                                                                                                                                                                                                                                                                                                                                                                            | 0                      |

|                  |    |
|------------------|----|
| Male             | 2  |
| <b>Age, year</b> |    |
| 20-39            | 0  |
| 40-59            | 2  |
| ≥60              | 6  |
| <b>AST, IU/L</b> |    |
| <25              | 0  |
| 25-39            | 5  |
| 40-59            | 9  |
| ≥60              | 13 |
| <b>ALT, IU/L</b> |    |
| <25              | 0  |
| ≥25              | 2  |

(3) Equation in CKB:  
 $-1.2420188 + 0.15651695 * \text{dat\$age\_category}$   
 $+ 0.3586473 * \text{dat\$sex}$   
 $- 0.076442133 * \text{dat\$ALT\_category}$   
 $+ 0.12480102 * \text{dat\$AST\_category}$

### 2.3 Wen 3-2012

(1) Predictors: sex, age, smoking, drinking, physical activity, diabetes, AST, ALT

(2) Equation:

| Wen 3-2012 variable                | Scoring details |
|------------------------------------|-----------------|
| <b>Sex</b>                         |                 |
| Female                             | 0               |
| Male                               | 1               |
| <b>Age, year</b>                   |                 |
| 20-39                              | 0               |
| 40-59                              | 2               |
| ≥60                                | 6               |
| <b>Smoking, pack-years</b>         |                 |
| 0                                  | 0               |
| 1-9.9                              | 1               |
| ≥10                                | 1               |
| <b>Drinking</b>                    |                 |
| None or occasional                 | 0               |
| Regular                            | 1               |
| <b>Physical Activity, MET-hour</b> |                 |
| <3.75                              | 0               |
| 3.75-7.49                          | 0               |
| ≥7.5                               | -1              |
| <b>Diabetes</b>                    |                 |
| No                                 | 0               |
| Yes                                | 1               |
| <b>AST, IU/L</b>                   |                 |
| <25                                | 0               |
| 25-39                              | 4               |
| 40-59                              | 9               |
| ≥60                                | 12              |
| <b>ALT, IU/L</b>                   |                 |
| <25                                | 0               |

|                                                                                                                                                                                                                                                                                                                                                                                                                                                                                                                                                                                                                                                                                                                                                                                                                  |                        |
|------------------------------------------------------------------------------------------------------------------------------------------------------------------------------------------------------------------------------------------------------------------------------------------------------------------------------------------------------------------------------------------------------------------------------------------------------------------------------------------------------------------------------------------------------------------------------------------------------------------------------------------------------------------------------------------------------------------------------------------------------------------------------------------------------------------|------------------------|
| $\geq 25$                                                                                                                                                                                                                                                                                                                                                                                                                                                                                                                                                                                                                                                                                                                                                                                                        | 1                      |
| <p>(3) Equation in CKB:<br/> <math>-1.2300978 + 0.15784406 * \text{dat\\$age\_category}</math><br/> <math>+ 0.61661131 * \text{dat\\$sex}</math><br/> <math>- 0.21056898 * \text{dat\\$ALT\_category}</math><br/> <math>+ 0.14130867 * \text{dat\\$AST\_category}</math><br/> <math>+ 0.11230019 * \text{dat\\$alc\_category}</math><br/> <math>+ 0.089372728 * \text{dat\\$act\_category}</math><br/> <math>+ 0.024911687 * \text{dat\\$diabetes}</math><br/> <math>+ 0.071970998 * \text{dat\\$cig\_category}</math></p>                                                                                                                                                                                                                                                                                       |                        |
| <b>3. DM-HCC</b>                                                                                                                                                                                                                                                                                                                                                                                                                                                                                                                                                                                                                                                                                                                                                                                                 |                        |
| (1) Predictors: age, GGT, TG                                                                                                                                                                                                                                                                                                                                                                                                                                                                                                                                                                                                                                                                                                                                                                                     |                        |
| (2) Equation:                                                                                                                                                                                                                                                                                                                                                                                                                                                                                                                                                                                                                                                                                                                                                                                                    |                        |
| <b>DM-HCC variable</b>                                                                                                                                                                                                                                                                                                                                                                                                                                                                                                                                                                                                                                                                                                                                                                                           | <b>Scoring details</b> |
| Age, years                                                                                                                                                                                                                                                                                                                                                                                                                                                                                                                                                                                                                                                                                                                                                                                                       |                        |
| >65                                                                                                                                                                                                                                                                                                                                                                                                                                                                                                                                                                                                                                                                                                                                                                                                              | 11                     |
| ≤65                                                                                                                                                                                                                                                                                                                                                                                                                                                                                                                                                                                                                                                                                                                                                                                                              | 0                      |
| GGT (IU/L)                                                                                                                                                                                                                                                                                                                                                                                                                                                                                                                                                                                                                                                                                                                                                                                                       |                        |
| >80                                                                                                                                                                                                                                                                                                                                                                                                                                                                                                                                                                                                                                                                                                                                                                                                              | 16                     |
| 41-80                                                                                                                                                                                                                                                                                                                                                                                                                                                                                                                                                                                                                                                                                                                                                                                                            | 8                      |
| ≤40                                                                                                                                                                                                                                                                                                                                                                                                                                                                                                                                                                                                                                                                                                                                                                                                              | 0                      |
| TG (mg/dL)                                                                                                                                                                                                                                                                                                                                                                                                                                                                                                                                                                                                                                                                                                                                                                                                       |                        |
| <150                                                                                                                                                                                                                                                                                                                                                                                                                                                                                                                                                                                                                                                                                                                                                                                                             | 6                      |
| ≥150                                                                                                                                                                                                                                                                                                                                                                                                                                                                                                                                                                                                                                                                                                                                                                                                             | 0                      |
| <p>(3) Equation in CKB:<br/> <math>-0.50559487 + 0.071973603 * \text{dat\\$age\_category}</math><br/> <math>+ 0.10426216 * \text{dat\\$GGT\_category}</math><br/> <math>+ 0.038324225 * \text{dat\\$TG\_category}</math></p>                                                                                                                                                                                                                                                                                                                                                                                                                                                                                                                                                                                     |                        |
| <b>4. Li-2018</b>                                                                                                                                                                                                                                                                                                                                                                                                                                                                                                                                                                                                                                                                                                                                                                                                |                        |
| <p>(1) Predictors: age, gender, smoking habit, SGPT, variation of HbA1c, comorbidity, antidiabetes medications, antihyperlipidemia medication, THR<br/> Predictor definition:<br/> a. SGPT: serum ALT<br/> b. HbA1c: RPG<br/> c. Medication: as a user of specific medication when his/her number of prescription days for each specific drug was greater than 3 months. The anti diabetes medications of individual patients were further classified into 4 categories: no medication, oral anti diabetes drugs, insulin monotherapy, and insulin plus oral anti diabetes drugs.<br/> d. Antihyperlipidemia medications considered were statins and fibrates.<br/> e. THR: total/high-density lipoprotein (HDL) cholesterol ratio</p>                                                                           |                        |
| <p>(2) Equation:<br/> Age (-2 to 8)<br/> +Gender (0 if female, 2 if male)<br/> +Smoking habit (0 if no smoking, 2 if smoking)<br/> +SGPT (u/l) (0 if 6-45, 6 if &lt;6 or &gt;45)<br/> +Variation of HbA1c (%) (0 if &lt;8.5, 0 if 8.5-17.5, 1 if &gt;17.5)<br/> +Comorbidity (9 if Liver cirrhosis, 4 if Hepatitis B, 3 if Hepatitis C)<br/> +Antidiabetes medications (0 if no medication, 0 if oral only, 2 if insulin, 3 if insulin+oral agent)<br/> +Antihyperlipidemia medication:<br/> -No medication:<br/> -THR: male &lt;5; female &lt;4.5: Score 0<br/> -THR: male 5-9.4; female 4.5-7: Score-1<br/> -THR: male ≥9.5; female ≥7: Score 2<br/> -Yes medication:<br/> -THR: male &lt;5; female &lt;4.5: Score-2<br/> -THR: male 5-9.4; female 4.5-7: Score-4<br/> -THR: male ≥9.5; female ≥7: Score-3</p> |                        |
| <p>(3) Equation in CKB:<br/> <math>-2.0077928 + 1.6373314 * (\text{dat\\$age\_category} == "-1")</math></p>                                                                                                                                                                                                                                                                                                                                                                                                                                                                                                                                                                                                                                                                                                      |                        |

-0.084629372\*(dat\$age\_category=="0")  
 +1.5179949\*(dat\$age\_category=="1")  
 +1.355421\*(dat\$age\_category=="2")  
 +1.378663\*(dat\$age\_category=="3")  
 +1.3509516\*(dat\$age\_category=="4")  
 +1.7908917\*(dat\$age\_category=="5")  
 +2.0393897\*(dat\$age\_category=="6")  
 +2.2834965\*(dat\$age\_category=="7")  
 -2.4928856\*(dat\$age\_category=="8")  
 +0.37026501\*dat\$sex  
 -0.009137821\*dat\$smoke\_category  
 +0.2810228\*dat\$SGPT\_category+  
 0.76331689\*dat\$HbA1c\_category  
 +0.39906606\*dat\$comorbidity\_category  
 -2.095294\*dat\$antidiabetes\_category  
 -0.064815973\*dat\$THR\_category

### 5. Sinn-2020

- (1) Predictors: age, gender, body mass index, smoking, diabetes, total cholesterol, ALT  
 Predictor definition:
- BMI was classified according to Asian-specific criteria (underweight, BMI of <18.5 kg/m<sup>2</sup>; normal weight, BMI of 18.5 to 22.9 kg/m<sup>2</sup>; overweight, BMI of 23 to 24.9 kg/m<sup>2</sup>; and obese, BMI ≥25 kg/m<sup>2</sup>).
  - Pre-hypertension was defined as a systolic blood pressure 130-<140 mmHg or a diastolic blood pressure 85-<90 mmHg at the baseline screening.
  - Hypertension was defined as the presence of at least one I10-I13 or I15 code during the year preceding the screening, or a systolic blood pressure 140 mmHg or a diastolic blood pressure 90 mmHg at the baseline screening.
  - Pre-diabetes was defined as a fasting glucose level of 100-<126 mg/dL at the baseline screening. Diabetes was defined as the presence of at least one E11-E14 code or a fasting glucose level of 126 mg/dL at the baseline screening.
  - Dyslipidaemia was defined as the presence of an E78 code or a total cholesterol level of >240 mg/dL at the baseline screening.
  - ALT level was classified into three groups: low (<30 U/L for males and <20 U/L for females), mildly elevated (30-89 U/L for males and 20-59 U/L for females) and elevated (90 U/L for males and 60 U/L for females)
  - Current alcohol consumption was categorized into none or modest (<30 g/day in men and <20 g/day in women).

(2) Equation:

| DM-HCC variable                  | Scoring details |
|----------------------------------|-----------------|
| <b>Age</b>                       |                 |
| <50                              | 0               |
| 50-59                            | 3               |
| 60-69                            | 6               |
| ≥70                              | 7               |
| <b>Sex</b>                       |                 |
| Female                           | 0               |
| Male                             | 2               |
| <b>Smoking</b>                   |                 |
| Never                            | 0               |
| Past                             | 0               |
| Current                          | 1               |
| <b>Diabetes</b>                  |                 |
| No diabetes                      | 0               |
| Pre-diabetes                     | 0               |
| Diabetes                         | 1               |
| <b>Total cholesterol(mg/dL)</b>  |                 |
| <200                             | 2               |
| ≥200                             | 0               |
| <b>Alanine aminotransferasea</b> |                 |
| Low                              | 0               |



|                                                                                                                                                                                                                                                                                                                                                                                                                                                                                                                                                                                      |   |
|--------------------------------------------------------------------------------------------------------------------------------------------------------------------------------------------------------------------------------------------------------------------------------------------------------------------------------------------------------------------------------------------------------------------------------------------------------------------------------------------------------------------------------------------------------------------------------------|---|
| Mildly elevated                                                                                                                                                                                                                                                                                                                                                                                                                                                                                                                                                                      | 2 |
| Elevated                                                                                                                                                                                                                                                                                                                                                                                                                                                                                                                                                                             | 6 |
| (3) Equation in CKB:<br>-1.0888972+0.15591552*age_category<br>+0.44051948*sex<br>-0.042037495*current_smoking<br>-0.053377929*Diabetes<br>+0.159525*ALT_category<br>+1.3294444*Total_cholesterol                                                                                                                                                                                                                                                                                                                                                                                     |   |
| <b>6. Cao-2021</b>                                                                                                                                                                                                                                                                                                                                                                                                                                                                                                                                                                   |   |
| (1) Predictor: age, sex, liver diseases in mother, BMI, alcohol consumption, psychological trauma<br>Predictor definition:<br>a. Liver diseases in mothers: including liver cancer, chronic hepatitis B, and other liver disease.                                                                                                                                                                                                                                                                                                                                                    |   |
| (2) Equation:<br>F(t)=1-S(t)exp(f,M);<br>f,M=0.058*(age in years)<br>+0.879 * (Female=0, Male=1)<br>+0.608 * (liver diseases in mother: Yes=1, No=0)<br>+0.380 * (BMI<25=1, BMI ≥25=0)<br>+0.753 * (alcohol consumption ≥550 g/week ethanol: Yes=1, No=0)<br>+0.480 * (psychological trauma: Yes=1, No=0)-4.010.                                                                                                                                                                                                                                                                     |   |
| <b>CLD</b>                                                                                                                                                                                                                                                                                                                                                                                                                                                                                                                                                                           |   |
| <b>1.1 CLivD score(nonlab)</b>                                                                                                                                                                                                                                                                                                                                                                                                                                                                                                                                                       |   |
| (1) Predictors: age, WHR, alcohol use (spline variable), GGT, diabetes, smoking status, sex*GGT, sex*smoking status                                                                                                                                                                                                                                                                                                                                                                                                                                                                  |   |
| (2) Equation:<br>data\$modelab <-(-6.7922721+0.044744302*data\$AGE<br>+0.32961593*(data\$WHR*10)+0.19860813*data\$ALCOHOL<br>-0.0082096868*pmax(data\$ALCOHOL-0.1,0)^3<br>+0.010575035*pmax(data\$ALCOHOL-1,0)^3<br>-0.002004756*pmax(data\$ALCOHOL-3,0)^3<br>-0.00033998925*pmax(data\$ALCOHOL-9,0)^3<br>-2.0602882e-05*pmax(data\$ALCOHOL-<br>33,0)^3+0.011813962*data\$GGT+0.18721469*(data\$SEX=="2")<br>+0.55249734*(data\$DIABETES=="1")<br>+0.74679941*(data\$SMOKING=="1")<br>+0.0054325769*data\$GGT*(data\$SEX=="2")<br>-0.64903176*(data\$SEX=="2")*(data\$SMOKING=="1")) |   |
| (3) Equation in CKB:<br>-1.7996042-0.13849959*data\$alcohol_week<br>+0.0081373039*pmax(data\$alcohol_week-1,0)^3<br>-0.016951927*pmax(data\$alcohol_week-3,0)^3<br>+0.0090844935*pmax(data\$alcohol_week-5,0)^3<br>-0.00025840613*pmax(data\$alcohol_week-9,0)^3<br>-1.1464752e-05*pmax(data\$alcohol_week-33,0)^3<br>+0.050087058*data\$age<br>+0.45957616*data\$whr<br>+0.42501114*data\$diabetes<br>-0.27723986*data\$smoking<br>-0.52580546*data\$sex<br>+0.017439031*data\$smoking*data\$sex                                                                                    |   |
| <b>1.2 CLivD score(lab)</b>                                                                                                                                                                                                                                                                                                                                                                                                                                                                                                                                                          |   |
| (1) Predictors: age, WHR, alcohol use (spline variable), diabetes, smoking status, sex*smoking status                                                                                                                                                                                                                                                                                                                                                                                                                                                                                |   |
| (2) Equation:<br>data\$modelnonlab <-(-8.0940103+0.044177151*data\$AGE+0.48927753*(data\$WHR*10)<br>+0.19222894*data\$ALCOHOL-0.00015029544*pmax(data\$ALCOHOL-0.1,0)^3-<br>0.0021265611*pmax(data\$ALCOHOL-1,0)^3+0.0029832769*pmax(data\$ALCOHOL-3,0)^3-<br>0.00068765143*pmax(data\$ALCOHOL-9,0)^3-1.8769011e-05*pmax(data\$ALCOHOL-<br>33,0)^3+0.69669285*(data\$DIABETES=="1"))                                                                                                                                                                                                 |   |

|                                                                                                                                                                                                                                                                                                                                                                                                                                                                                                                                                                                                                                                          |
|----------------------------------------------------------------------------------------------------------------------------------------------------------------------------------------------------------------------------------------------------------------------------------------------------------------------------------------------------------------------------------------------------------------------------------------------------------------------------------------------------------------------------------------------------------------------------------------------------------------------------------------------------------|
| $+0.75968055*(data\$SMOKING=="1")$<br>$+0.63248362*(data\$SEX=="2")-0.59146649*(data\$SMOKING=="1)*(data\$SEX=="2")$                                                                                                                                                                                                                                                                                                                                                                                                                                                                                                                                     |
| <p>(3) Equation in CKB:</p> $-1.0759261-0.04427105*data\$alcohol\_week$<br>$+4.3147139e-05*pmax(data\$alcohol\_week-0.1,0)^3$<br>$-9.0209853e-05*pmax(data\$alcohol\_week-15,0)^3$<br>$+5.0565399e-05*pmax(data\$alcohol\_week-30,0)^3$<br>$-3.502685e-06*pmax(data\$alcohol\_week-48,0)^3$<br>$+0.044255473*data\$age$<br>$-1.1958386*data\$whr$<br>$+0.01055964*data\$ggt$<br>$-0.49321834*data\$sex$<br>$+0.030192835*data\$diabetes$<br>$+0.099859348*data\$smoking$<br>$+0.0041691027*data\$ggt*data\$sex$<br>$-0.077726792*data\$sex*data\$smoking$                                                                                                |
| <b>2. BARD</b>                                                                                                                                                                                                                                                                                                                                                                                                                                                                                                                                                                                                                                           |
| (1) Predictors: BMI, AST, ALT, T2DM                                                                                                                                                                                                                                                                                                                                                                                                                                                                                                                                                                                                                      |
| (2) Equation:<br>(1 if BMI >28 kg/m <sup>2</sup> )<br>+(2 if AST/ALT ratio >0.8)<br>+(1 if T2DM)                                                                                                                                                                                                                                                                                                                                                                                                                                                                                                                                                         |
| (3) Equation in CKB:<br>$-0.66609144-0.1319787*data\$bmi\_c$<br>$+0.33679484*data\$diabetes\_c$<br>$+0.34728017*data\$ast\_c$                                                                                                                                                                                                                                                                                                                                                                                                                                                                                                                            |
| <b>3. dAAR</b>                                                                                                                                                                                                                                                                                                                                                                                                                                                                                                                                                                                                                                           |
| (1) Predictors: age, ALT, AST                                                                                                                                                                                                                                                                                                                                                                                                                                                                                                                                                                                                                            |
| (2) Equation:<br>dataset\$riskscore1<-10.129915+0.039811813*dataset\$AGE<br>+0.25387407*dataset\$ALT<br>-0.0023607234*pmax(dataset\$ALT-11,0)^3<br>+0.0079492072*pmax(dataset\$ALT-17,0)^3<br>-0.0076811579*pmax(dataset\$ALT-22,0)^3<br>+0.0021985068*pmax(dataset\$ALT-30,0)^3<br>-0.00010583268*pmax(dataset\$ALT-58,0)^3<br>+3.5333535*dataset\$astalt<br>-7.3473709*pmax(dataset\$astalt-0.63,0)^3<br>+32.911587*pmax(dataset\$astalt-0.92,0)^3<br>-44.937707*pmax(dataset\$astalt-1.14,0)^3<br>+21.786619*pmax(dataset\$astalt-1.41,0)^3<br>-2.4131284*pmax(dataset\$astalt-2.13,0)^3                                                              |
| (3) Equation in CKB:<br>$-10.334179-0.12283087*data\$ALT$<br>$+0.0004243091*pmax(data\$ALT-0.1,0)^3$<br>$-0.0012106484*pmax(data\$ALT-11,0)^3$<br>$+0.00090314578*pmax(data\$ALT-17,0)^3$<br>$-0.00031645783*pmax(data\$ALT-22,0)^3$<br>$+0.00023916006*pmax(data\$ALT-30,0)^3$<br>$-3.9508734e-05*pmax(data\$ALT-58,0)^3$<br>$+10.649273*data\$astalt$<br>$-4.8201285*pmax(data\$astalt-0.1,0)^3$<br>$+7.4526922*pmax(data\$astalt-0.63,0)^3$<br>$+10.855356*pmax(data\$astalt-0.92,0)^3$<br>$-21.971644*pmax(data\$astalt-1.14,0)^3$<br>$+10.031624*pmax(data\$astalt-1.41,0)^3$<br>$-1.5478998*pmax(data\$astalt-2.13,0)^3$<br>$+0.03380337*data$AGE$ |
| <b>4. CAP-B</b>                                                                                                                                                                                                                                                                                                                                                                                                                                                                                                                                                                                                                                          |

- (1) Predictors: age, sex, income, chronic hepatitis C, diabetes mellitus, statin exposure, antiplatelet exposure, smoking, ALT, GGT  
 Predictor definition:
- Income: medical aid <25%, low income=25-50%, intermediate=50-75%
  - Disease history: chronic hepatitis C; diabetes mellitus
  - Defined statin exposure as having filled at least 2 prescriptions within a six-month period,
  - Aspirin exposure as a prescription for at least once within 2 years prior to the index date
  - Smoking: smoking was based on the current status (i.e. yes or no) by patient health questionnaires
  - GGT\*alcohol consumption:
  - Drinking: alcohol drinking was based on the current status (i.e. yes or no) by patient health questionnaires
  - Normal GGT: 3-50 U/L

(2) Equation:

$$\begin{aligned}
 &0.677*(\text{male}) \\
 &+0.085*(\text{age}) \\
 &+0.310*(\text{medical aid}/<25\%) \\
 &+0.249*(\text{low income}) \\
 &+0.146*(\text{intermediate income}) \\
 &+0.066*(\text{chronic hepatitis C}) \\
 &+0.406*(\text{diabetes mellitus}) \\
 &-0.426*(\text{statin exposure}) \\
 &+0.025*(\text{antiplatelet exposure}) \\
 &+0.230*(\text{smoking})+0.539*(\text{ALT } >35) \\
 &+0.079*(\text{normal GGT and drinking or abnormal GGT and } \& \text{ nondrinking}) \\
 &+0.532*(\text{abnormal GGT and drinking})+0.426 \\
 &P(t)=1-S_0(t)\exp(\text{risk score}-0.43)
 \end{aligned}$$

**Table S1 Bias assessment**

| No | Study                       | ROB          |            |         |          | Applicability |            |         | Overall |               |
|----|-----------------------------|--------------|------------|---------|----------|---------------|------------|---------|---------|---------------|
|    |                             | Participants | Predictors | Outcome | Analysis | Participants  | Predictors | Outcome | ROB     | Applicability |
| 1  | Fredrik Åberg (2022)        | Low          | Low        | Low     | Low      | Low           | Low        | Low     | Low     | Low           |
| 2  | Vincent Wai-Sun Won (2010)  | Low          | Low        | Low     | High     | Low           | Low        | Low     | High    | Low           |
| 3  | Hwai-I Yan (2010)           | Low          | Low        | Low     | Unclear  | Low           | Low        | Low     | Unclear | Low           |
| 4  | Man-Fung Yuen (2009)        | Low          | Low        | Low     | Unclear  | Low           | Low        | Low     | Unclear | Low           |
| 5  | Hwai-I Yang (2011)          | Low          | Unclear    | Low     | Unclear  | Low           | Low        | Low     | Unclear | Low           |
| 6  | Masayuki Kurosaki (2012)    | Low          | Unclear    | Low     | High     | Low           | Low        | Low     | High    | Low           |
| 7  | Takehiro Michikawa (2012)   | Low          | Low        | Unclear | Unclear  | Low           | Low        | Low     | Unclear | Low           |
| 8  | Chi-Pang Wen (2012)         | Low          | Low        | Low     | Unclear  | Low           | Low        | Low     | Unclear | Low           |
| 9  | Juan Carlos Gavilán (2013)  | Low          | Unclear    | Low     | High     | Low           | Low        | Low     | High    | Low           |
| 10 | Mei-Hsuan Lee (2013)        | Low          | Unclear    | Low     | Unclear  | Low           | Low        | Low     | Unclear | Low           |
| 11 | Yu-Ju Lin (2013)            | Low          | Low        | Low     | High     | Low           | Low        | Low     | High    | Low           |
| 12 | Mei-Hsuan Lee (2014)        | Low          | Low        | Low     | High     | Low           | Low        | Low     | High    | Low           |
| 13 | Talita Duarte-Salles (2016) | Low          | Unclear    | Low     | Unclear  | Low           | Low        | Low     | Unclear | Low           |
| 14 | Beomseok Suh (2015)         | Low          | Unclear    | Low     | Unclear  | Low           | Low        | Low     | Unclear | Low           |
| 15 | Chunsun Fan (2019)          | Low          | Unclear    | Unclear | High     | Low           | Low        | Low     | High    | Low           |
| 16 | Won Keun Si (2016)          | Low          | Unclear    | Low     | High     | Low           | Low        | Low     | High    | Low           |
| 17 | Adeel A. Butt (2017)        | Low          | Unclear    | High    | Unclear  | Low           | Low        | Low     | High    | Low           |
| 18 | Wei-Yi Kao (2017)           | Low          | Unclear    | Unclear | Unclear  | Low           | Low        | Low     | Unclear | Low           |
| 19 | M. A. Konerman (2017)       | Low          | Low        | Low     | Unclear  | Low           | Low        | Low     | Unclear | Low           |
| 20 | Yeon Seok Seo (2017)        | Low          | Unclear    | Low     | High     | Low           | Low        | Low     | High    | Low           |
| 21 | Hwai-I Yang (2016)          | Low          | Low        | Low     | Low      | Low           | Low        | Low     | Low     | Low           |
| 22 | Tsai-Chung Li (2018)        | Low          | Low        | Low     | Unclear  | Low           | Low        | Low     | Unclear | Low           |
| 23 | Lilian Yan Liang (2021)     | Low          | Low        | Low     | High     | Low           | Low        | Low     | High    | Low           |
| 24 | Dong Hyun Sinn (2020)       | Low          | Low        | Low     | High     | Low           | Low        | Low     | High    | Low           |
| 25 | Dong Hyun Sinn (2019)       | Low          | Low        | High    | High     | Low           | Low        | Low     | High    | Low           |
| 26 | Fredrik Åberg (2021)        | Low          | Unclear    | Low     | Unclear  | Low           | Low        | Low     | Unclear | Low           |
| 27 | Yuting Wang (2021)          | Low          | Low        | Unclear | High     | Low           | Low        | Low     | High    | Low           |
| 28 | Mathias Daheim (2016)       | Unclear      | Unclear    | Unclear | High     | Low           | Low        | Low     | High    | Low           |

| No | Study                                   | ROB          |            |         |          | Applicability |            |         | Overall |               |
|----|-----------------------------------------|--------------|------------|---------|----------|---------------|------------|---------|---------|---------------|
|    |                                         | Participants | Predictors | Outcome | Analysis | Participants  | Predictors | Outcome | ROB     | Applicability |
| 29 | Ae Jeong Jo (2022)                      | Low          | Low        | Low     | High     | Low           | Low        | Low     | High    | Low           |
| 30 | Hannes Hagström (2019)                  | Low          | Unclear    | Low     | Unclear  | Low           | Low        | Low     | Unclear | Low           |
| 31 | Dong Hyun Sinn (2016)                   | High         | Unclear    | Low     | High     | Low           | Low        | Low     | High    | Low           |
| 32 | Chansik An (2021)                       | Low          | Low        | Low     | Low      | Low           | Low        | Low     | Low     | Low           |
| 33 | Chengxiao Yu (2021)                     | Low          | Low        | Low     | High     | Low           | Low        | Low     | High    | Low           |
| 34 | Thanachote Kamalpirat (2021)            | Low          | Unclear    | Unclear | High     | Low           | Low        | Low     | High    | Low           |
| 35 | Alessandra Porto de Macedo Costa (2022) | Low          | Unclear    | Low     | High     | Low           | Low        | Low     | High    | Low           |
| 36 | Nada Assi (2018)                        | Low          | Low        | Unclear | Unclear  | Low           | Low        | Low     | Unclear | Low           |
| 37 | Tai-Chung Tseng (2017)                  | Low          | Unclear    | Low     | Unclear  | Low           | Low        | Low     | Unclear | Low           |
| 38 | Philip J. Johnson (2022)                | Low          | Unclear    | Low     | Low      | Low           | Low        | Low     | Low     | Low           |
| 39 | Do Young Kim (2013)                     | Low          | Unclear    | Low     | High     | Low           | Low        | Low     | High    | Low           |
| 40 | Monica A. Konerman (2019)               | Low          | Unclear    | High    | High     | Low           | Low        | Low     | High    | Low           |
| 41 | An K. Le (2021)                         | Low          | Low        | Low     | Unclear  | Low           | Low        | Low     | Unclear | Low           |
| 42 | Maomao Cao (2021)                       | Low          | Low        | Unclear | Unclear  | Low           | Low        | Low     | Unclear | Low           |
| 43 | Hannes Hagström (2019)                  | Low          | Low        | Unclear | High     | Low           | Low        | Low     | High    | Low           |
| 44 | Jae Seung Lee (2021)                    | Low          | Unclear    | Low     | High     | Low           | Low        | Low     | High    | Low           |
| 45 | Thierry Poynard (2019)                  | Low          | Unclear    | Low     | High     | Low           | Low        | Low     | High    | Low           |
| 46 | Jonathan Thomas (2022)                  | Low          | Low        | Unclear | Unclear  | Low           | Low        | Low     | Unclear | Low           |
| 47 | Grace Lai-Hung Wong (2014)              | Low          | Unclear    | Low     | High     | Low           | Low        | Low     | High    | Low           |
| 48 | Thierry Poynard (2021)                  | Low          | Unclear    | Unclear | Unclear  | Low           | Low        | Low     | Unclear | Low           |
| 49 | Hsiao-Hsien Rau (2016)                  | Low          | Low        | Low     | Unclear  | Low           | Low        | Low     | Unclear | Low           |
| 50 | Seung Hwan Shin (2015)                  | Low          | Unclear    | Low     | High     | Low           | Low        | Low     | High    | Low           |
| 51 | Namyong Paik (2018)                     | Low          | Unclear    | Unclear | Unclear  | Low           | Low        | Low     | Unclear | Low           |
| 52 | Kyu Sik Jung (2015)                     | Low          | Unclear    | Low     | Unclear  | Low           | Low        | Low     | Unclear | Low           |
| 53 | Mi Young Jeon (2018)                    | Low          | Unclear    | Low     | Unclear  | Low           | Low        | Low     | Unclear | Low           |
| 54 | Mahmoud Abu-Amara (2016)                | Low          | Unclear    | Unclear | Unclear  | Low           | Low        | Low     | Unclear | Low           |
| 55 | W. P. Brouwer (2017)                    | Low          | Unclear    | Low     | Unclear  | Low           | Low        | Low     | Unclear | Low           |
| 56 | Zhongxian Poh (2016)                    | Low          | Unclear    | Low     | High     | Low           | Low        | Low     | High    | Low           |
| 57 | Namkyu Kang (2021)                      | Low          | Low        | Low     | High     | Low           | Low        | Low     | High    | Low           |

**Table S2 Predictors of prediction models for general population**

| Model                   | Demographic |     | Lifestyle |     |      |    |         |     |          | Blood-based biomarkers |     |     |     |     |     |     |     |       |       |         |    |    | Others |     |                                                         |
|-------------------------|-------------|-----|-----------|-----|------|----|---------|-----|----------|------------------------|-----|-----|-----|-----|-----|-----|-----|-------|-------|---------|----|----|--------|-----|---------------------------------------------------------|
|                         | Age         | Sex | Alcohol   | BMI | Diet | PA | Smoking | WHR | Diabetes | AFP                    | ALB | ALP | ALT | AST | BIL | GGT | Glu | HBsAg | HBeAg | HBV DNA | TC | TG |        | PLT |                                                         |
| AGED                    | √           | √   |           |     |      |    |         |     |          |                        |     |     | √   |     |     |     |     |       | √     | √       |    |    |        |     |                                                         |
| An-2021                 | √           | √   |           | √   |      |    |         |     |          |                        |     |     | √   |     | √   |     |     |       | √     | √       | √  |    |        |     | income etc.‡<br>Family history of cancer etc.§          |
| CKB-PLR                 | √           | √   | √         | √   |      | √  | √       |     |          |                        |     |     |     |     |     |     | √   |       |       |         |    |    |        |     |                                                         |
| CLivD (lab)             | √           | √   | √         |     |      |    | √       | √   | √        |                        |     |     |     |     | √   |     |     |       |       |         |    |    |        |     |                                                         |
| CLivD (non-lab)         | √           | √   | √         |     |      |    | √       | √   | √        |                        |     |     |     |     |     |     |     |       |       |         |    |    |        |     |                                                         |
| dAAR                    | √           |     |           |     |      |    |         |     |          |                        |     | √   | √   |     |     |     |     |       |       |         |    |    |        |     |                                                         |
| Duarte-Salles 2016 1-   |             |     |           |     |      |    |         |     |          | √                      |     |     |     |     |     |     |     |       |       |         |    |    |        |     | OPN                                                     |
| Duarte-Salles 2016 2-   |             |     |           |     |      |    |         |     |          | √                      | √   |     | √   |     | √   |     |     |       |       |         |    |    |        |     | OPN                                                     |
| Duarte-Salles 2016 3-   |             |     |           |     |      |    |         |     |          |                        | √   |     | √   |     | √   |     |     |       |       |         |    |    |        |     |                                                         |
| Duarte-Salles 2016 4-   |             |     |           |     |      |    |         |     |          |                        | √   |     | √   |     | √   |     |     |       |       |         |    |    |        |     | OPN                                                     |
| Elaborate Model         | Base        | √   | √         | √   | √    | √  | √       |     |          |                        |     |     |     |     |     |     |     |       |       |         |    |    |        |     | height, general health status                           |
| HLI                     |             |     | √         | √   | √    | √  | √       |     |          |                        |     |     |     |     |     |     |     |       |       |         |    |    |        |     | hepatitis                                               |
| LCR1                    | √           | √   |           |     |      |    |         |     |          |                        |     |     |     |     | √   |     |     |       |       |         |    |    |        |     | APOA1, Hp, A2M                                          |
| LCR2                    | √           | √   |           |     |      |    |         |     |          | √                      |     |     |     |     | √   |     |     |       |       |         |    |    |        |     | APOA1, Hp, A2M                                          |
| LFS                     |             |     |           |     |      |    |         |     |          |                        | √   | √   | √   | √   | √   | √   |     |       |       |         |    |    |        |     |                                                         |
| LFS+lifestyle signature |             |     | √         | √   | √    | √  | √       |     |          |                        |     |     |     |     |     |     |     |       |       |         |    |    |        |     | hepatitis                                               |
| LFS+metabolic signature |             |     |           |     |      |    |         |     |          |                        |     |     |     |     |     |     | √   |       |       |         |    |    |        |     | Metabolic signature¶                                    |
| Metabolic signature     |             |     |           |     |      |    |         |     |          |                        | √   | √   | √   | √   | √   | √   | √   |       |       |         |    |    |        |     | Metabolic signature¶<br>coffee consumption, Anti-HCV Ab |
| Michikawa               | √           | √   | √         | √   |      |    |         |     |          |                        |     |     |     |     |     |     |     | √     |       |         |    |    |        |     | general health status                                   |
| Parsimonious Model      | Base        | √   | √         | √   | √    | √  | √       |     |          |                        |     |     |     |     |     |     |     |       |       |         |    |    |        |     |                                                         |
| Sinn-020                | √           | √   |           |     |      |    | √       |     |          |                        |     |     | √   |     |     |     |     |       |       |         |    | √  |        |     |                                                         |
| Sung(established)-2012  |             |     |           |     |      |    |         | √   |          |                        |     | √   |     |     |     | √   |     |       |       |         |    |    | √      | √   |                                                         |
| Sung(new)-2012          |             |     |           |     |      |    |         | √   |          |                        |     | √   |     |     |     | √   |     |       |       |         |    |    | √      | √   |                                                         |
| Wen 1-2012              | √           | √   | √         |     |      | √  | √       |     |          |                        |     |     |     |     |     |     |     |       |       |         |    |    |        |     |                                                         |
| Wen 1'-2012             | √           | √   | √         |     |      | √  | √       |     |          |                        |     |     |     |     |     |     |     |       |       |         |    |    |        |     |                                                         |
| Wen 2-2012              | √           | √   |           |     |      |    |         |     |          |                        |     | √   | √   |     |     |     |     |       |       |         |    |    |        |     |                                                         |

| Model       | Demographic |     | Lifestyle |     |      |    |         |     |          | Blood-based biomarkers |     |     |     |     |     |     |     |       |       |         | Others |    |    |             |
|-------------|-------------|-----|-----------|-----|------|----|---------|-----|----------|------------------------|-----|-----|-----|-----|-----|-----|-----|-------|-------|---------|--------|----|----|-------------|
|             | Age         | Sex | Alcohol   | BMI | Diet | PA | Smoking | WHR | Diabetes | AFP                    | ALB | ALP | ALT | AST | BIL | GGT | Glu | HBsAg | HBeAg | HBV DNA |        | TC | TG | PLT         |
| Wen 2'-2012 | √           | √   |           |     |      |    |         |     |          |                        |     |     | √   | √   |     |     |     |       |       |         |        |    |    |             |
| Wen 3-2012  | √           | √   | √         |     |      | √  | √       |     | √        |                        |     |     | √   | √   |     |     |     |       |       |         |        |    |    |             |
| Wen 3'-2012 | √           | √   | √         |     |      | √  | √       |     | √        |                        |     |     | √   | √   |     |     |     |       |       |         |        |    |    |             |
| Wen 4-2012  | √           | √   | √         |     |      | √  | √       |     | √        | √                      |     |     | √   | √   |     |     |     | √     |       |         |        |    |    |             |
| Wen 4'-2012 | √           | √   | √         |     |      | √  | √       |     | √        | √                      |     |     | √   | √   |     |     |     | √     |       |         |        |    |    |             |
| Wen 5'-2012 | √           | √   | √         |     |      | √  | √       |     | √        | √                      |     |     | √   | √   |     |     |     | √     |       |         |        |    |    | Anti-HCV Ab |

‡: Income, family history of chronic liver disease, disease history (chronic liver disease, chronic hepatitis virus infection, HIV infection, dyslipidemia, or schizophrenic/delusional disorders or mental disorders due to psychoactive substance use)

§: Family history of cancer, residential area, education, disease history (cancer, gallstone or gallbladder disease), cirrhosis

¶: Glutamic acid, Hexoses, SMC16:1, SM(OH)C14:1, SM(OH)C22:2, LysoPC aC28:1, PC aeC30:2

A2M: alpha2 - macroglobulin; AAR: aspartate-to-alanine aminotransferase ratio; AFP: alpha-fetoprotein; ALB: Albumin; ALP: alkaline phosphatase; ALT: alanine transaminase; Anti-HCV Ab: Anti-Hepatitis C Virus Antibody; APOA1: apolipoprotein A1; AST: aspartate transaminase; BIL: Bilirubin; GGT: gamma-glutamyl transferase; Glu: Glutamic acid; HBeAg: Hepatitis B e Antigen; HBsAg: Hepatitis B Surface Antigen; Hp: haptoglobin; PA: physical activity; PLT: Platelet count; TC: total cholesterol; TG concentration: triglyceride concentration; WC: waist circumference; WHR: waist-to-hip rate

**Table S3 Predictors of prediction models for HBV infected individuals**

| Model                                        | Demographic |     | Lifestyle |     |         | Personal and family history |           |                | Blood-based biomarkers |     |     |     |     |       |         | Others |                                                     |
|----------------------------------------------|-------------|-----|-----------|-----|---------|-----------------------------|-----------|----------------|------------------------|-----|-----|-----|-----|-------|---------|--------|-----------------------------------------------------|
|                                              | Age         | Sex | Alcohol   | BMI | Smoking | Diabetes                    | Cirrhosis | Family history | AFP                    | ALB | ALT | AST | GGT | HBeAg | HBV DNA |        | PLT                                                 |
| Cao-2021                                     | √           | √   | √         | √   |         |                             |           | √‡             |                        |     |     |     |     |       |         |        | Psychological trauma                                |
| CAP-B Score                                  | √           | √   | √         |     | √       | √                           |           |                |                        |     | √   |     | √   |       |         |        | income, CHC, statin exposure, anitplatelet exposure |
| D <sup>2</sup> AS                            | √           | √   |           |     |         |                             |           |                |                        |     | √   |     |     | √     | √       |        |                                                     |
| GAG-HCC                                      | √           | √   |           |     |         |                             | √         |                |                        |     |     |     |     |       | √       |        | core promoter mutations                             |
| GAG-HCC (non-core promoter mutations)        | √           | √   |           |     |         |                             | √         |                |                        |     |     |     |     |       | √       |        |                                                     |
| Le-2021                                      | √           | √   |           |     |         | √                           |           |                |                        |     | √   | √   |     | √     |         |        | antiviral treatment                                 |
| Lee-2013                                     | √           | √   |           |     |         |                             |           | √              |                        |     | √   |     |     | √     | √       |        |                                                     |
| Liang score                                  | √           | √   |           |     |         |                             |           |                |                        |     |     |     |     |       |         | √      | FIB-4                                               |
| Lin-Model I                                  | √           | √   |           |     |         |                             |           |                |                        | √   | √   |     |     | √     | √       |        |                                                     |
| Lin-Model II                                 | √           | √   |           |     |         |                             |           |                | √                      |     | √   | √   | √   |       |         |        | alpha-1 globulin                                    |
| Lin-Model III                                | √           | √   |           |     |         |                             |           |                | √                      | √   | √   | √   | √   |       | √       |        | alpha-1 globulin                                    |
| LSM-HCC                                      | √           |     |           |     |         |                             |           |                |                        | √   |     |     |     |       | √       |        | Liver stiffness                                     |
| LSPS                                         |             |     |           |     |         |                             |           |                |                        |     |     |     |     |       |         | √      | Liver stiffness, spleen diameter                    |
| MALE-ABCD                                    | √           |     |           |     |         |                             |           |                | √                      |     |     |     | √   |       |         |        |                                                     |
| Methylation Profile                          |             |     |           |     |         |                             |           |                |                        |     |     |     |     |       |         |        | three methylated sites§                             |
| Model 1-regression model                     | √           | √   | √         |     |         |                             |           | √              |                        |     | √   |     |     | √     |         |        |                                                     |
| Model 2-regression model                     | √           | √   | √         |     |         |                             |           | √              |                        |     | √   |     |     | √     | √       |        |                                                     |
| Model 3-regression model                     | √           | √   | √         |     |         |                             |           | √              |                        |     | √   |     |     | √     | √       |        | HBV genotype                                        |
| NGM1-HCC                                     | √           | √   | √         |     |         |                             |           | √              |                        |     | √   |     |     | √     |         |        |                                                     |
| NGM2-HCC                                     | √           | √   | √         |     |         |                             |           | √              |                        |     | √   |     |     | √     | √       |        |                                                     |
| NGM3-HCC                                     | √           | √   | √         |     |         |                             |           | √              |                        |     | √   |     |     | √     | √       |        | HBV genotype                                        |
| REACH-B                                      | √           | √   |           |     |         |                             |           |                |                        |     | √   |     |     | √     | √       |        |                                                     |
| REACH-B IIa                                  | √           | √   |           |     |         |                             |           |                |                        |     | √   |     |     | √     | √       |        |                                                     |
| REACH-B IIb                                  | √           | √   |           |     |         |                             |           |                |                        |     | √   |     |     | √     |         |        |                                                     |
| RWS-HCC                                      | √           | √   |           |     |         |                             | √         |                | √                      |     |     |     |     |       |         |        |                                                     |
| Sinn-2019                                    | √           | √   |           |     |         |                             | √         |                |                        |     | √   |     |     | √     |         | √      |                                                     |
| Transient elastography-based risk estimation | √           | √   |           |     |         |                             |           |                |                        |     |     |     |     |       | √       |        | liver stiffness                                     |



| Model    | Demographic |     | Lifestyle |     |         | Personal and family history |           |                | Blood-based biomarkers |     |     |     |     |       |         | Others |
|----------|-------------|-----|-----------|-----|---------|-----------------------------|-----------|----------------|------------------------|-----|-----|-----|-----|-------|---------|--------|
|          | Age         | Sex | Alcohol   | BMI | Smoking | Diabetes                    | Cirrhosis | Family history | AFP                    | ALB | ALT | AST | GGT | HBeAg | HBV DNA |        |
| Won-2010 | √           |     |           |     |         |                             | √         |                | √                      |     |     |     |     |       | √       |        |

‡: Liver diseases in mothers

§: cg00300879, cg06872964, and cg07080864

AFP: α-Fetoprotein; ALB: Albumin; ALT: Alanine Aminotransferase; AST: Aspartate Aminotransferase; CHC: chronic Hepatitis C; GGT: Gamma-Glutamyl Transferase; PLT: Platelet

**Table S4 Predictors of prediction models for other populations**

| Model                       | Demographic |     | Lifestyle |         | Personal and family history |           |           |             | Blood-based biomarkers |     |     |     |    |     |       |     | other                                                                 |
|-----------------------------|-------------|-----|-----------|---------|-----------------------------|-----------|-----------|-------------|------------------------|-----|-----|-----|----|-----|-------|-----|-----------------------------------------------------------------------|
|                             | Age         | Sex | BMI       | Smoking | Diabetes                    | Cirrhosis | Hepatitis | Fatty liver | ALB                    | ALT | AST | AFP | BR | GGT | HBsAg | PLT |                                                                       |
| ANN-model 1                 | √           | √   |           |         |                             | √         | √         | √           |                        |     |     |     |    |     |       |     | alcoholic cirrhosis etc.‡                                             |
| ANN-model 2                 | √           | √   |           |         |                             | √         | √         | √           |                        |     |     |     |    |     |       |     | alcoholic cirrhosis etc.§                                             |
| ANN-model 3                 | √           | √   |           |         |                             | √         | √         | √           |                        |     |     |     |    |     |       |     | nonalcoholic cirrhosis etc.¶                                          |
| CNN                         |             |     |           |         |                             |           |           |             |                        |     |     |     |    |     |       |     |                                                                       |
| CRS                         |             |     |           |         |                             |           |           |             |                        |     |     |     |    |     |       |     | seven SNPs                                                            |
| CS boosting model           |             |     |           |         |                             |           |           |             |                        |     |     |     |    |     |       |     |                                                                       |
| DM-HCC                      | √           |     |           |         |                             |           |           |             |                        |     |     |     |    | √   |       |     | TG                                                                    |
| GRU                         |             |     |           |         |                             |           |           |             |                        |     |     |     |    |     |       |     |                                                                       |
| Li-2018                     | √           | √   |           | √       |                             | √         | √         |             |                        | √   |     |     |    |     |       |     | Hba1C, antidiabetes medication, antihyperlipidemia medication and THR |
| HCC-4 Risk Score            | √           |     |           |         |                             |           |           |             |                        |     |     | √   |    |     |       | √   | gammaglobulin                                                         |
| HCC-RS                      | √           | √   |           |         |                             | √         |           |             | √                      | √   | √   |     | √  |     |       | √   | Cardiovascular disease etc.▪                                          |
| Liver Volume Index          |             |     |           |         |                             |           |           |             |                        |     |     |     |    | √   |       |     | Volume Index                                                          |
| longitudinal boosting model |             |     |           |         |                             |           |           |             |                        |     |     |     |    |     |       |     |                                                                       |
| longitudinal Cox model      |             |     |           |         |                             |           |           |             |                        |     |     |     |    |     |       |     |                                                                       |
| LR-model 1                  | √           | √   |           |         |                             | √         | √         | √           |                        |     |     |     |    |     |       |     | alcoholic cirrhosis etc.‡                                             |
| LR-model 2                  | √           | √   |           |         |                             | √         | √         | √           |                        |     |     |     |    |     |       |     | alcoholic cirrhosis etc.§                                             |
| LR-model 3                  | √           | √   |           |         |                             | √         | √         | √           |                        |     |     |     |    |     |       |     | nonalcoholic cirrhosis etc.¶                                          |
| LS-Based Model 1            | √           |     |           |         |                             |           |           |             |                        |     |     | √   |    |     |       | √   | Liver Stiffness                                                       |
| LS-Based Model 2            | √           |     |           |         |                             |           |           |             |                        |     |     | √   |    |     |       | √   | Liver Stiffness                                                       |
| LS-Based Model 3            | √           |     |           |         |                             |           |           |             |                        |     |     | √   |    |     |       | √   | Liver Stiffness                                                       |
| LSTM                        |             |     |           |         |                             |           |           |             |                        |     |     |     |    |     |       |     |                                                                       |
| Kurosaki-2012               | √           |     |           |         |                             |           |           |             | √                      |     |     |     |    |     |       | √   |                                                                       |
| Lee-2014                    | √           |     |           |         |                             | √         |           |             |                        | √   | √   |     |    |     |       |     | HCV RNA and HCV Genotype                                              |

‡: alcoholic cirrhosis, nonalcoholic cirrhosis, alcoholic hepatitis, viral hepatitis, other types of chronic hepatitis, alcoholic fatty liver disease, other types of fatty liver disease and hyperlipidemia

§: alcoholic cirrhosis, alcoholic hepatitis, alcoholic fatty liver disease

¶: nonalcoholic cirrhosis, viral hepatitis, other types of chronic hepatitis, other types of fatty liver disease, and hyperlipidemia

•: Cardiovascular disease, Colorectal cancer, Lung cancers, Urinary/renal malignancies, Cervical cancer, Breast cancer, Lymphoma, Chronic kidney disease, Osteopenia, Osteoporosis, Hypertension, Anticoagulants, ACEI/ARB, Antiplatelet agents, Beta blockers, Histamine-2 receptor antagonist, Insulin, Immunosuppressant, Sulphonylurea, Thiazides, Other lipid-lowering agents, Other oral hypoglycaemic agents, Proton pump inhibitor, Potassium sparing diuretics, Statins, Loop diuretics, Metformin, NSAID  
AFP:  $\alpha$ -Fetoprotein; ALB: Albumin; ALT: Alanine Aminotransferase; AST: Aspartate Aminotransferase; BR: Bilirubin; GGT: Gamma-Glutamyl Transferase; HBsAg: Hepatitis B surface antigen; HbA1c: Hemoglobin A1c; PLT: Platelet; TG: Triglycerides

**Table S5 Sensitivity analysis for PLC and HCC**

| Model         | Population | Time horizon (years) | PLC (C22)     |                  | HCC (C22.0+C22.9) |                  | HCC (C22.0)  |                  |
|---------------|------------|----------------------|---------------|------------------|-------------------|------------------|--------------|------------------|
|               |            |                      | Events/total  | C-index          | Events/total      | C-index          | Events/total | C-index          |
| HLI           | General    | 10                   | 1,888/478,930 | 0.65 (0.64-0.67) | 1,709/478,930     | 0.68 (0.67-0.70) | 163/478,930  | 0.68 (0.63-0.73) |
| Wen 1-2012    | General    | 5                    | 875/478,930   | 0.72 (0.71-0.74) | 793/478,930       | 0.72 (0.70-0.74) | 71/478,930   | 0.76 (0.71-0.81) |
| Wen 1-2012    | General    | 10                   | 1,888/478,930 | 0.72 (0.70-0.73) | 1,709/478,930     | 0.72 (0.70-0.73) | 163/478,930  | 0.76 (0.72-0.80) |
| DM-HCC (all)  | General    | 5                    | 30/15,818     | 0.69 (0.60-0.79) | 26/15,818         | 0.68 (0.57-0.79) | 3/15,818     | 0.71 (0.60-0.82) |
| Li-2018 (all) | General    | 3                    | 17/17,227     | 0.80 (0.70-0.90) | 12/17,227         | 0.83 (0.75-0.92) | 1/17,227     | 0.98 (0.98-0.98) |
| Li-2018 (all) | General    | 5                    | 32/17,227     | 0.75 (0.66-0.83) | 28/17,227         | 0.76 (0.68-0.84) | 3/17,227     | 0.92 (0.85-0.99) |
| Li-2018 (all) | General    | 10                   | 80/17,227     | 0.74 (0.68-0.79) | 72/17,227         | 0.74 (0.68-0.80) | 8/17,227     | 0.91 (0.84-0.98) |
| Sinn-2020     | General    | 5                    | 32/17,227     | 0.69 (0.60-0.77) | 28/17,227         | 0.70 (0.61-0.78) | 3/17,227     | 0.90 (0.81-0.99) |
| Sinn-2020     | General    | 10                   | 80/17,227     | 0.67 (0.61-0.73) | 72/17,227         | 0.66 (0.60-0.72) | 8/17,227     | 0.86 (0.77-0.95) |
| Wen 2-2012    | General    | 5                    | 32/17,227     | 0.68 (0.59-0.77) | 28/17,227         | 0.70 (0.62-0.79) | 3/17,227     | 0.82 (0.67-0.97) |
| Wen 2-2012    | General    | 10                   | 80/17,227     | 0.67 (0.61-0.73) | 72/17,227         | 0.67 (0.61-0.74) | 8/17,227     | 0.81 (0.66-0.96) |
| Wen 3-2012    | General    | 5                    | 32/17,227     | 0.69 (0.60-0.78) | 28/17,227         | 0.71 (0.62-0.80) | 3/17,227     | 0.98 (0.95-0.99) |
| Wen 3-2012    | General    | 10                   | 80/17,227     | 0.68 (0.62-0.73) | 72/17,227         | 0.68 (0.61-0.74) | 8/17,227     | 0.85 (0.69-0.99) |

**Table S6 CLD risk model for 5-year HCC discrimination in the published literature and CKB**

| Model         | Population   | Time horizon | Development cohort |              |                  | Published external validation cohort |                  |              | CKB              |  |
|---------------|--------------|--------------|--------------------|--------------|------------------|--------------------------------------|------------------|--------------|------------------|--|
|               |              |              | Area               | Events/total | C-index (95% CI) | Events/total                         | C-index (95% CI) | Events/total | C-index (95% CI) |  |
| <b>HCC</b>    |              |              |                    |              |                  |                                      |                  |              |                  |  |
| DM-HCC (all)  | General      | 5            | EAS                | -            | -                | -                                    | -                | 26/15,818    | 0.68 (0.57-0.79) |  |
| Li-2018 (all) | General      | 3            | EAS                | -            | -                | -                                    | -                | 12/17,227    | 0.83 (0.75-0.92) |  |
| Li-2018 (all) | General      | 5            | EAS                | -            | -                | -                                    | -                | 28/17,227    | 0.76 (0.68-0.84) |  |
| Sinn-2020     | General      | 5            | EAS                | -            | -                | -                                    | -                | 28/17,227    | 0.70 (0.61-0.78) |  |
| Wen 1-2012    | General      | 5            | EAS                | -            | -                | -                                    | -                | 793/478,930  | 0.72 (0.70-0.74) |  |
| Wen 2-2012    | General      | 5            | EAS                | -            | -                | -                                    | -                | 28/17,227    | 0.70 (0.62-0.79) |  |
| Wen 3-2012    | General      | 5            | EAS                | -            | -                | -                                    | -                | 28/17,227    | 0.71 (0.62-0.80) |  |
| Cao-2021      | HBV infected | 3            | EAS                | 203/110,536  | 0.73 (0.64-0.82) | -                                    | -                | 141/13,723   | 0.75 (0.72-0.79) |  |
| Cao-2021      | HBV infected | 5            | EAS                | -            | -                | -                                    | -                | 250/13,723   | 0.74 (0.71-0.78) |  |
| DM-HCC        | T2D          | 5            | EAS                | 36/2,364     | 0.86 (0.85-0.88) | -                                    | -                | 2/1,348      | 0.75 (0.44-0.99) |  |
| Li-2018       | T2D          | 5            | EAS                | 493/21,149   | 0.80 (0.77-0.83) | -                                    | -                | 2/1,490      | 0.99 (0.99-0.99) |  |

**Table S7 CLD risk model for 5-year CLD discrimination in the published literature and CKB**

| Model      | Population   | Time horizon | Development cohort |                |                  | Published external validation cohort |                  |              | CKB              |  |
|------------|--------------|--------------|--------------------|----------------|------------------|--------------------------------------|------------------|--------------|------------------|--|
|            |              |              | Area               | Events/total   | C-index (95% CI) | Events/total                         | C-index (95% CI) | Events/total | C-index (95% CI) |  |
| <b>CLD</b> |              |              |                    |                |                  |                                      |                  |              |                  |  |
| BARD       | General      | 5            | EUR                | -              | -                | 232/75,303                           | 0.57 (0.52-0.63) | 74/17,227    | 0.55 (0.51-0.59) |  |
| dAAR       | General      | 5            | EUR                | 89/18,067      | 0.80 (0.74-0.85) | 343/126,941                          | 0.74 (0.71-0.77) | 74/17,227    | 0.74 (0.68-0.81) |  |
| CAP-B      | HBV infected | 3            | EAS                | 5,781/401,745  | 0.78 (0.78-0.78) | -                                    | -                | 8/394        | 0.91 (0.83-0.98) |  |
| CAP-B      | HBV infected | 5            | EAS                | 10,278/401,745 | 0.78 (0.78-0.78) | -                                    | -                | 11/394       | 0.81 (0.67-0.94) |  |

**Table S8 CLD diseases and causes in high income countries and China in 2019**

| Diseases and causes                                       | High income countries |         | China       |         |
|-----------------------------------------------------------|-----------------------|---------|-------------|---------|
|                                                           | Number                | Percent | Number      | Percent |
| <b>Liver cancer (total)</b>                               | 261,313               | -       | 290,373     | -       |
| alcohol use                                               | 62,969                | 24%     | 25,488      | 9%      |
| hepatitis B                                               | 52,212                | 20%     | 193,969     | 67%     |
| hepatitis C                                               | 118,240               | 45%     | 41,078      | 14%     |
| NASH                                                      | 15,984                | 6%      | 12,831      | 4%      |
| other causes                                              | 11,908                | 5%      | 17,007      | 6%      |
| <b>Cirrhosis and other chronic liver diseases (total)</b> | 161,286,494           | -       | 427,983,626 | -       |
| alcohol use                                               | 3,421,267             | 2%      | 2,417,135   | 1%      |
| hepatitis B                                               | 11,557,512            | 7%      | 111,315,938 | 26%     |
| hepatitis C                                               | 10,550,277            | 7%      | 19,023,979  | 4%      |
| NAFLD                                                     | 134,191,713           | 83%     | 293,409,373 | 69%     |
| other causes                                              | 1,565,725             | 1%      | 1,817,200   | 0%      |

**Table S9 Risk factors for CLD in CKB and Western populations**

| <b>Risk factors</b>         | <b>CKB liver cancer</b>       | <b>CKB cirrhosis</b>          | <b>CUP liver cancer</b> |
|-----------------------------|-------------------------------|-------------------------------|-------------------------|
| Alcohol per 10 g/day        | 1.11 (1.07-1.14) <sup>3</sup> | 1.18 (1.14-1.22) <sup>4</sup> | 1.04 (1.02-1.06)        |
| BMI per 5 kg/m <sup>2</sup> | 1.05 (0.94-1.15) <sup>5</sup> | -                             | 1.30 (1.16-1.46)        |
| Diabetes                    | 1.49 (1.30-1.70) <sup>6</sup> | 1.81 (1.57-2.09)              | -                       |
| Physical activity           | 0.81 (0.71-0.93)              | 0.76 (0.66-0.88)              | 0.54 (0.23-1.29)        |
| Smoking                     | 1.29 (1.16-1.42) <sup>7</sup> | 1.08 (0.95-1.23)              | -                       |



**Table S10 Summary of Liver Cancer Screening Strategies**

|                   | <b>EASL<sup>8</sup></b>                                                                                                                                                                                                                                                                                                                                                                                                                                                                                                       | <b>AASLD<sup>9</sup></b>                                                                                                                                                                                                                                                                                                                                                                                                                                                                                                                                                                                                                                                                                               | <b>China screening strategy<sup>10</sup></b>                                                                                                                                                                                                                                                                                                                   |
|-------------------|-------------------------------------------------------------------------------------------------------------------------------------------------------------------------------------------------------------------------------------------------------------------------------------------------------------------------------------------------------------------------------------------------------------------------------------------------------------------------------------------------------------------------------|------------------------------------------------------------------------------------------------------------------------------------------------------------------------------------------------------------------------------------------------------------------------------------------------------------------------------------------------------------------------------------------------------------------------------------------------------------------------------------------------------------------------------------------------------------------------------------------------------------------------------------------------------------------------------------------------------------------------|----------------------------------------------------------------------------------------------------------------------------------------------------------------------------------------------------------------------------------------------------------------------------------------------------------------------------------------------------------------|
| <b>Population</b> | <ol style="list-style-type: none"> <li>1. Cirrhotic patients, Child-Pugh stage A and B</li> <li>2. Cirrhotic patients, Child-Pugh stage C awaiting liver transplantation</li> <li>3. Non-cirrhotic HBV patients at intermediate or high risk of HCC<sup>a</sup> (according to PAGE-B<sup>b</sup> classes for Caucasian subjects, respectively 10-17 and ≥18 score points)</li> <li>4. Non-cirrhotic F3 patients, regardless of aetiology may be considered for surveillance based on an individual risk assessment</li> </ol> | <ol style="list-style-type: none"> <li>1. Child-Pugh A-B cirrhosis, any etiology <ul style="list-style-type: none"> <li>-Hepatitis B</li> <li>-Hepatitis C (viremic or post-SVR)</li> <li>-Alcohol associated cirrhosis</li> <li>-Nonalcoholic steatohepatitis</li> <li>-Other etiologies</li> </ul> </li> <li>2. Child-Pugh C cirrhosis, transplant candidate</li> <li>3. Non-cirrhotic chronic hepatitis B <ul style="list-style-type: none"> <li>-Man from endemic country<sup>c</sup> age &gt;40 years</li> <li>-Woman from endemic country<sup>c</sup> age &gt;50 years</li> <li>-Person from Africa at earlier age<sup>d</sup></li> <li>-Family history of HCC</li> <li>-PAGE-B score ≥10</li> </ul> </li> </ol> | <p>Males aged 45-74 and females aged 50-74 who meet at least one of the following criteria:</p> <ol style="list-style-type: none"> <li>1. Positive Hepatitis B surface antigen (HBsAg)</li> <li>2. History of HCV infection</li> <li>3. History of liver cirrhosis</li> <li>4. A first-degree/second-degree relative with a history of liver cancer</li> </ol> |
| <b>Method</b>     | Abdominal ultrasound                                                                                                                                                                                                                                                                                                                                                                                                                                                                                                          | Ultrasound and AFP                                                                                                                                                                                                                                                                                                                                                                                                                                                                                                                                                                                                                                                                                                     | Serum alpha-fetoprotein (AFP) test and abdominal ultrasound                                                                                                                                                                                                                                                                                                    |
| <b>Frequency</b>  | Every six months                                                                                                                                                                                                                                                                                                                                                                                                                                                                                                              | Every six months                                                                                                                                                                                                                                                                                                                                                                                                                                                                                                                                                                                                                                                                                                       |                                                                                                                                                                                                                                                                                                                                                                |

a Patients at low HCC risk left untreated for HBV and without regular six months surveillance must be reassessed at least yearly to verify progression of HCC risk.

b PAGE-B (Platelet, Age, Gender, hepatitis B) score is based on decade of age(16-29=0, 30-39=2, 40-49=4, 50-59=6, 60-69=8, ≥70=10), gender(M=6, F=0) and platelet count (≥200,000/ll=0, 100,000-199,999/ll=1, <100,000/ll=2): a total sum of ≤9 is considered at low risk of HCC(almost 0% HCC at five years) a score of 10-17 at intermediate risk(3% incidence HCC at five years) and ≥18 is at high risk(17% HCC at five years).

c Endemic country as defined by AASLD hepatitis B virus guidance.

d Surveillance can be initiated as early as third decade of life given median age 46 years at HCC diagnosis.

e Other risk calculators can be considered, although PAGE-B has been validated in Western populations on antiviral therapy.

EASL: European Association for the Study of the Liver; AASLD: American Association for the Study of Liver Diseases

## References

1. Chen Z, Chen J, Collins R, Guo Y, Peto R, Wu F, Li L: China Kadoorie Biobank of 0.5 million people: survey methods, baseline characteristics and long-term follow-up. *Int J Epidemiol* 2011, 40(6):1652-1666.
2. Yang G, Rao C, Ma J, et al. Validation of verbal autopsy procedures for adult deaths in China. *Int J Epidemiol*. 2006;35(3):741-748.
3. Im PK, Wright N, Yang L, Chan KH, Chen Y, Guo Y, et al. Alcohol consumption and risks of more than 200 diseases in Chinese men. *Nat Med*. 2023;29(6):1476-86.
4. Im PK, Millwood IY, Kartsonaki C, Guo Y, Chen Y, Turnbull I, et al. Alcohol drinking and risks of liver cancer and non-neoplastic chronic liver diseases in China: a 10-year prospective study of 0.5 million adults. *BMC Med*. 2021;19(1):216.
5. Pang Y, Kartsonaki C, Guo Y, Chen Y, Yang L, Bian Z, et al. Central adiposity in relation to risk of liver cancer in Chinese adults: A prospective study of 0.5 million people. *Int J Cancer*. 2019;145(5):1245-53.
6. Pang Y, Kartsonaki C, Turnbull I, Guo Y, Clarke R, Chen Y, et al. Diabetes, Plasma Glucose, and Incidence of Fatty Liver, Cirrhosis, and Liver Cancer: A Prospective Study of 0.5 Million People. *Hepatology*. 2018;68(4):1308-18.
7. Chan KH, Wright N, Xiao D, Guo Y, Chen Y, Du H, et al. Tobacco smoking and risks of more than 470 diseases in China: a prospective cohort study. *Lancet Public Health*. 2022;7(12):e1014-e26.
8. EASL Clinical Practice Guidelines: Management of hepatocellular carcinoma. *J Hepatol*. 2018;69(1):182-236.
9. Singal AG, Llovet JM, Yarchoan M, Mehta N, Heimbach JK, Dawson LA, et al. AASLD practice guidance on prevention, diagnosis, and treatment of hepatocellular carcinoma. *Hepatology*. 2023.
10. [Guideline for stratified screening and surveillance of primary liver cancer(2020 Edition)]. *Zhonghua Gan Zang Bing Za Zhi*. 2021;29(1):25-40.

**Fig. S1 Calibration plots of 5-year HCC risk prediction models in the CKB**

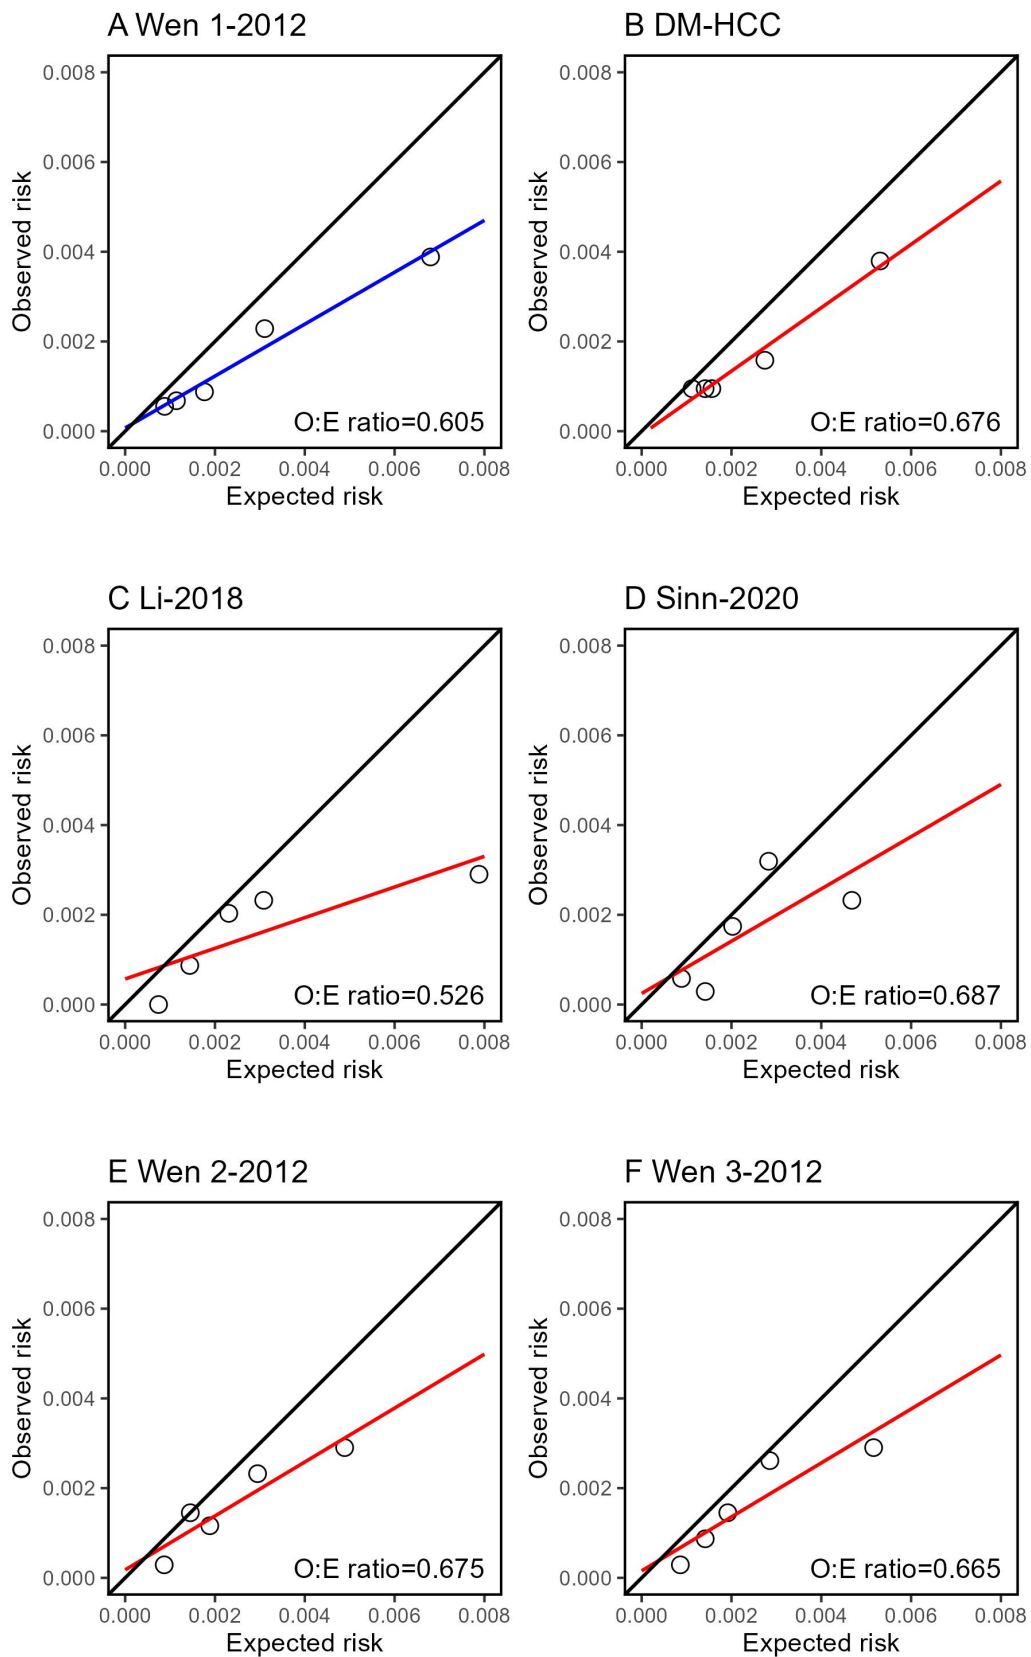

Blue color represents models with non-lab predictors, while red color indicates models that include lab predictors.

**Fig. S2 Calibration plots of 5-year CLD risk prediction models in the CKB**

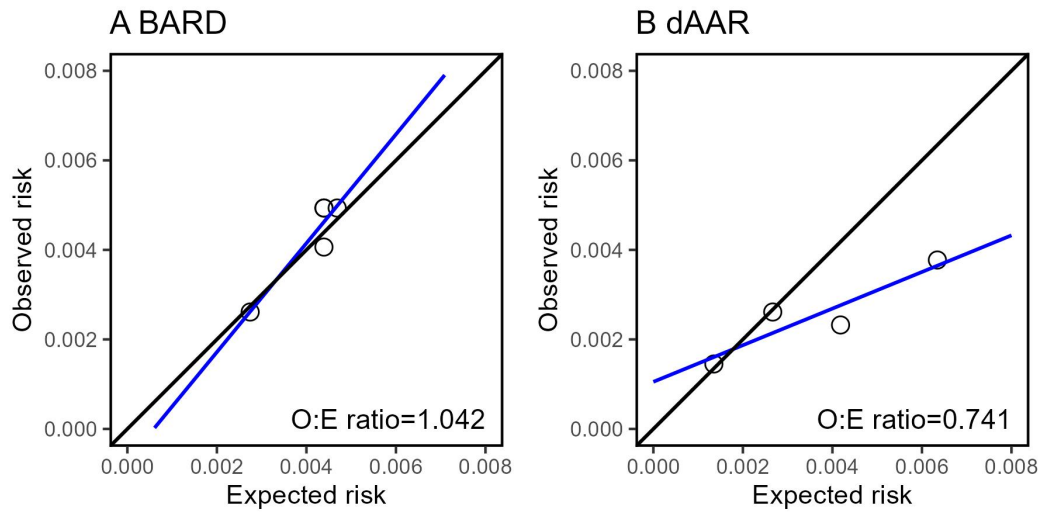

**Fig. S3 Discrimination of CLD risk prediction models in the published literature and CKB**

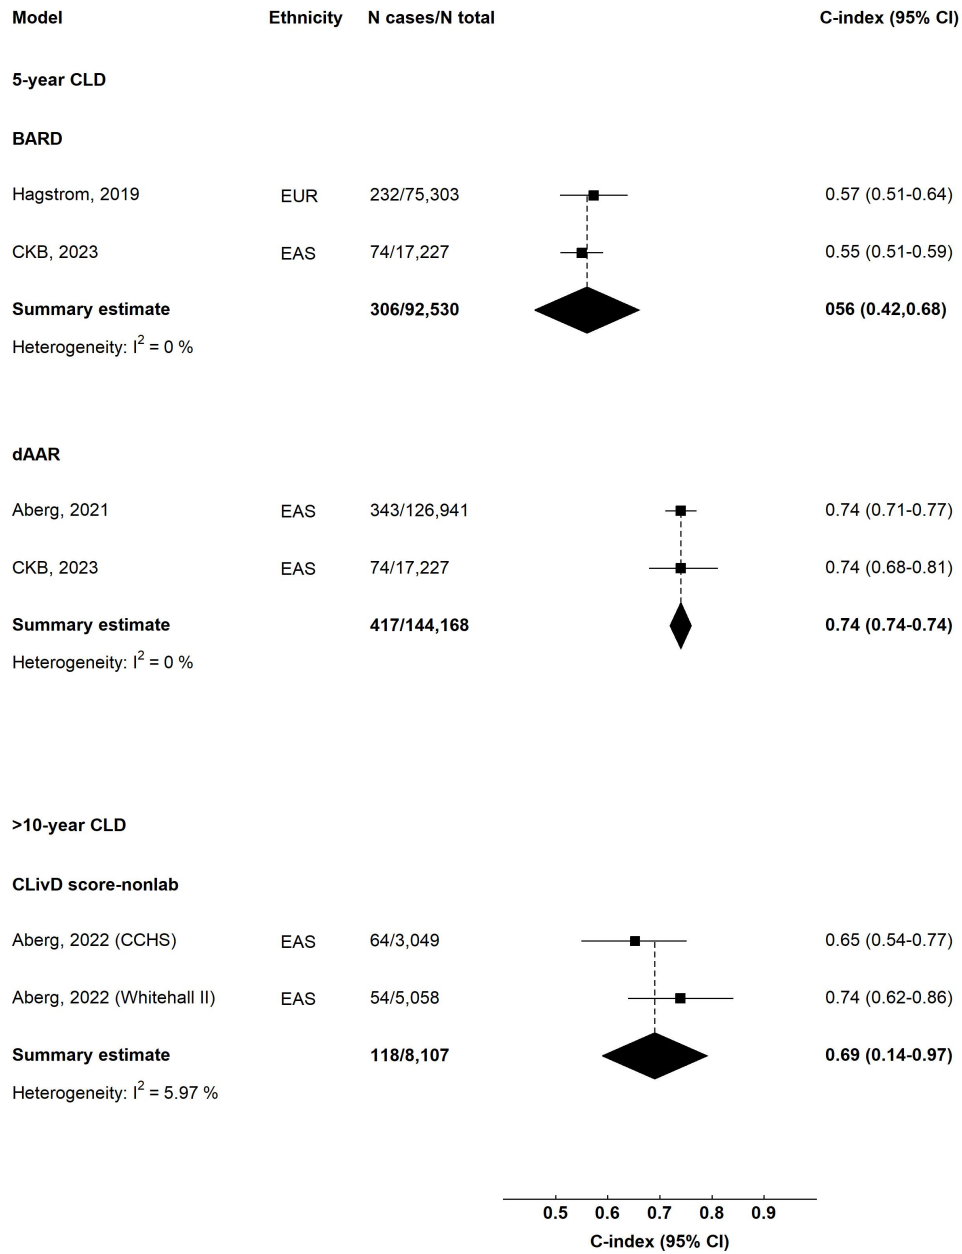

**Fig. S4 Discrimination of HCC risk prediction models in the general population**

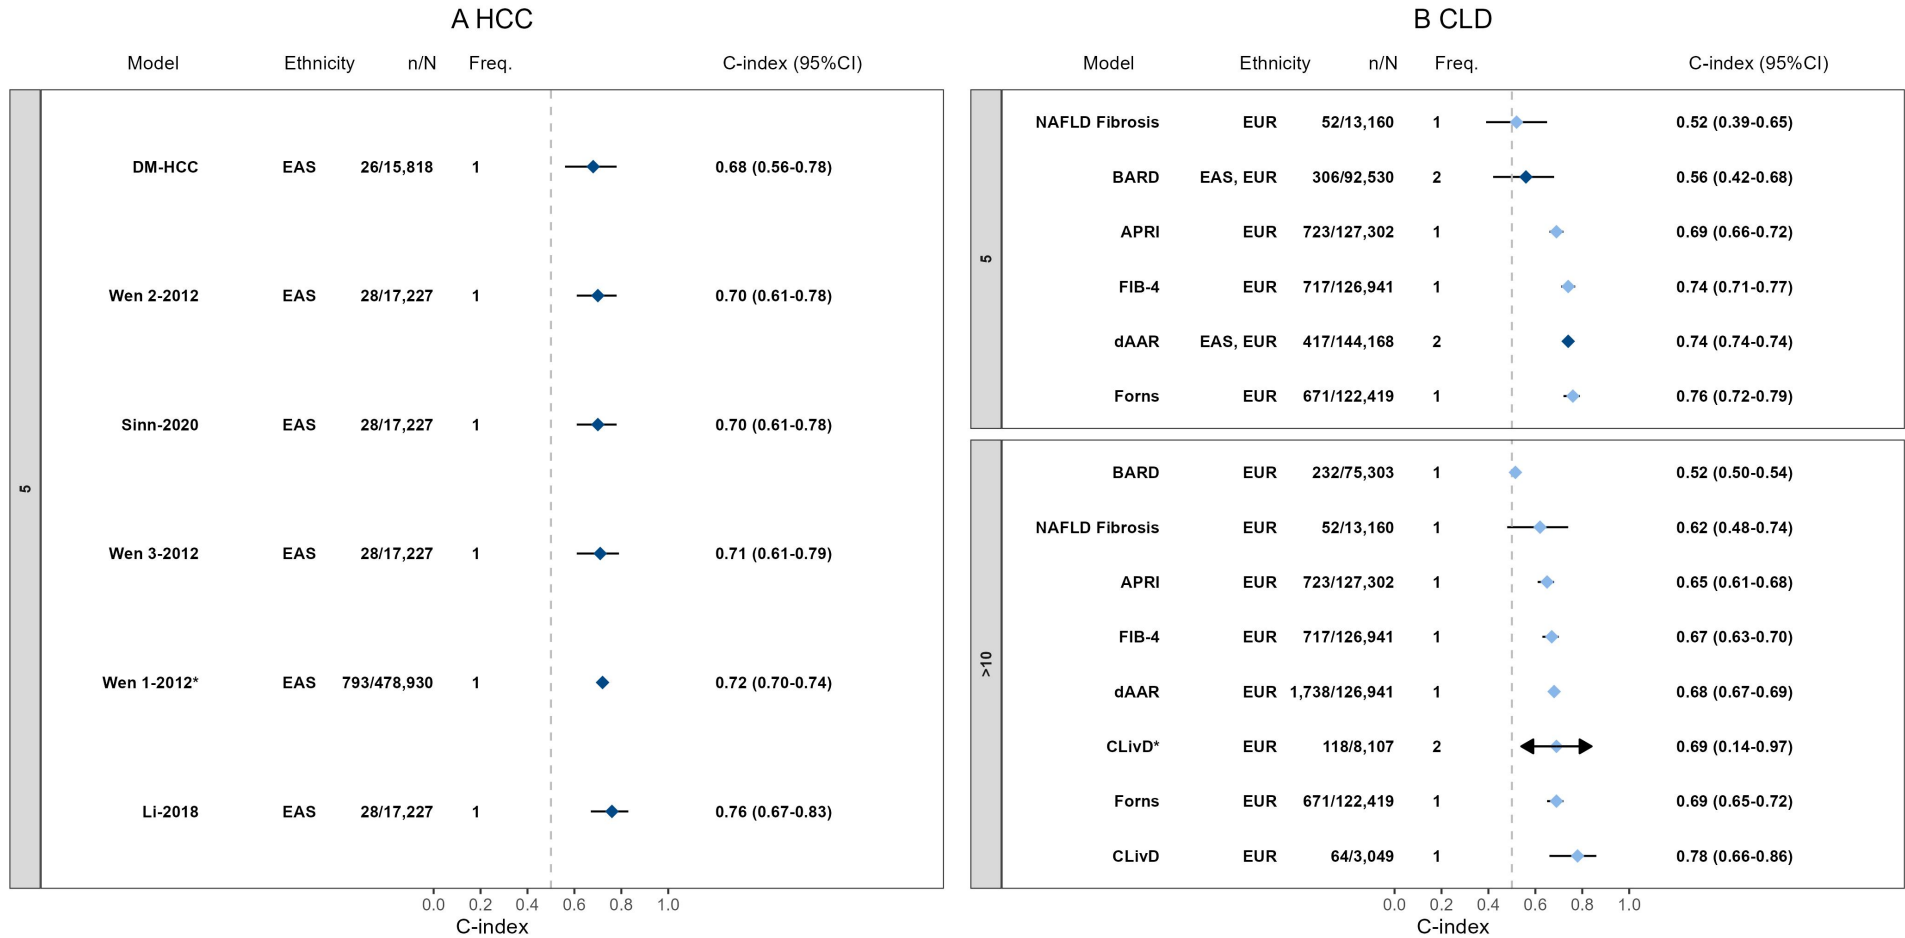

An asterisk (\*) represents a predictive model comprising all non-lab predictors. Dark blue color denotes models externally validated in CKB, while light blue color represents models not externally validated in CKB. "Ethnicity" represents the development population, and "Freq." represents the model's external validation frequency. The REAL-B model was not included due to the population being post-treatment or intervention liver disease patients.

**Fig. S5 Discrimination of HCC risk prediction models in the HBV infected individuals**

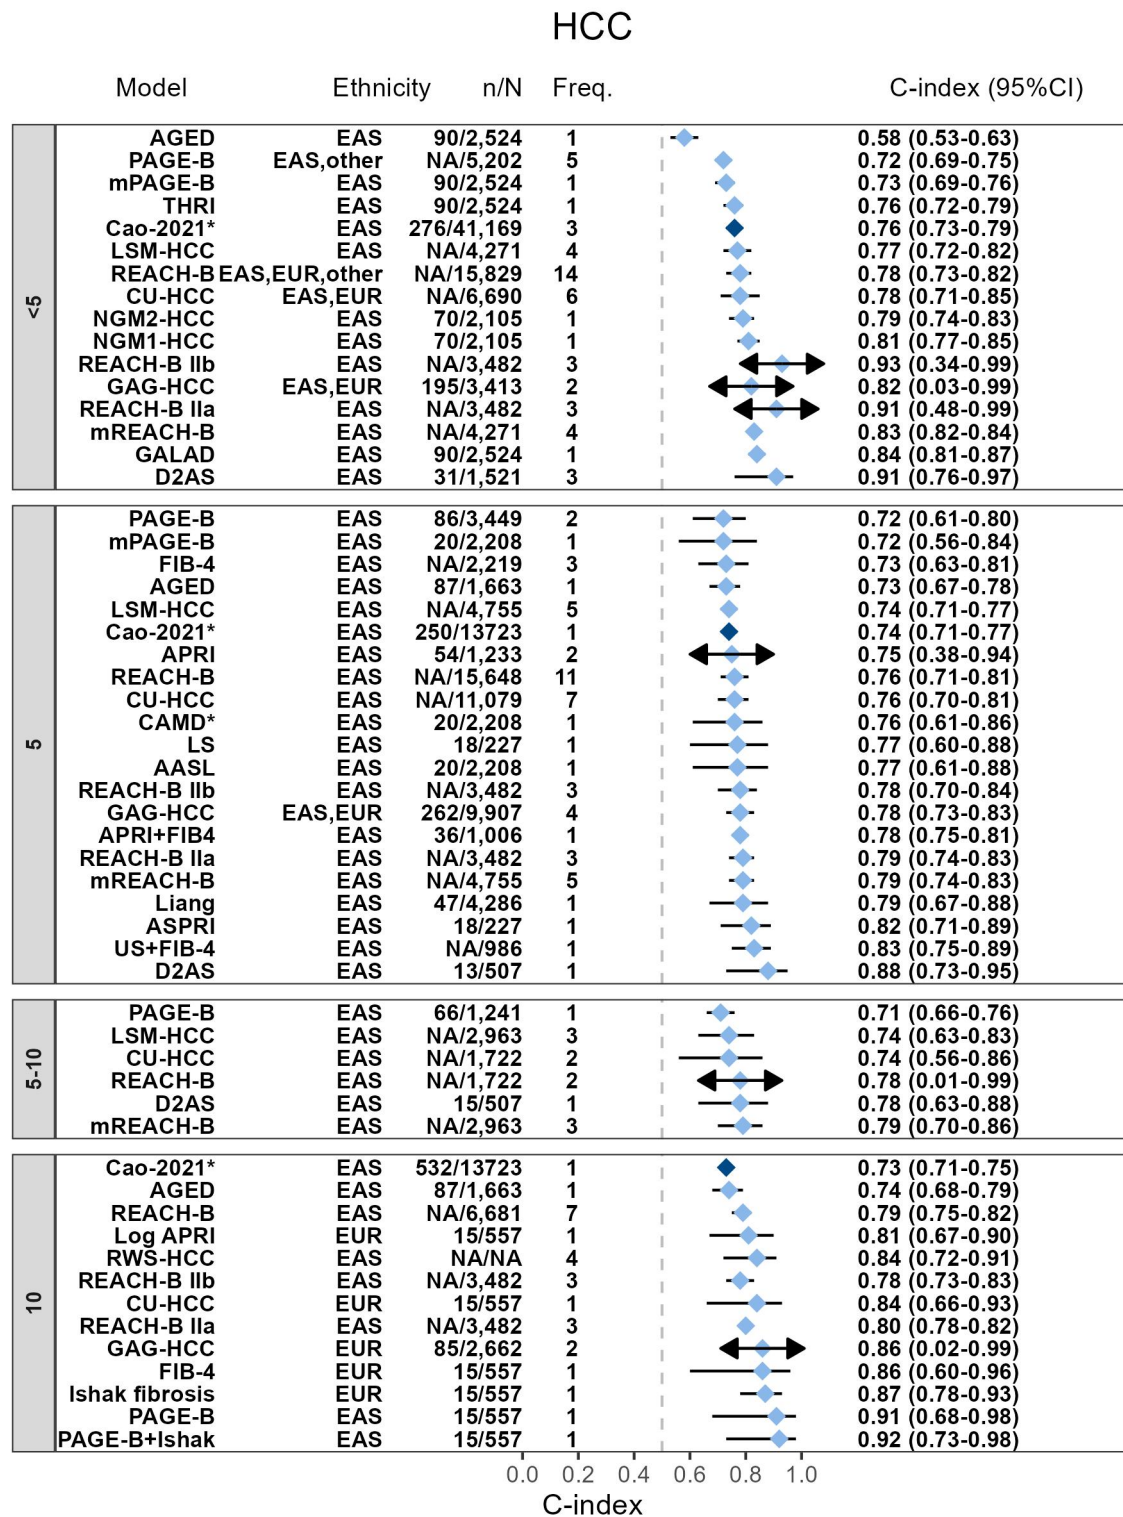

An asterisk (\*) represents a predictive model comprising all non-lab predictors. Dark blue color denotes models externally validated in CKB, while light blue color represents models not externally validated in CKB. "Ethnicity" represents the development population, and "Freq." represents the model's external validation frequency. The REAL-B model was not included due to the population being post-treatment or intervention liver disease patients.

**Fig. S6 Discrimination of CLD risk prediction models in the HBV infected individuals**

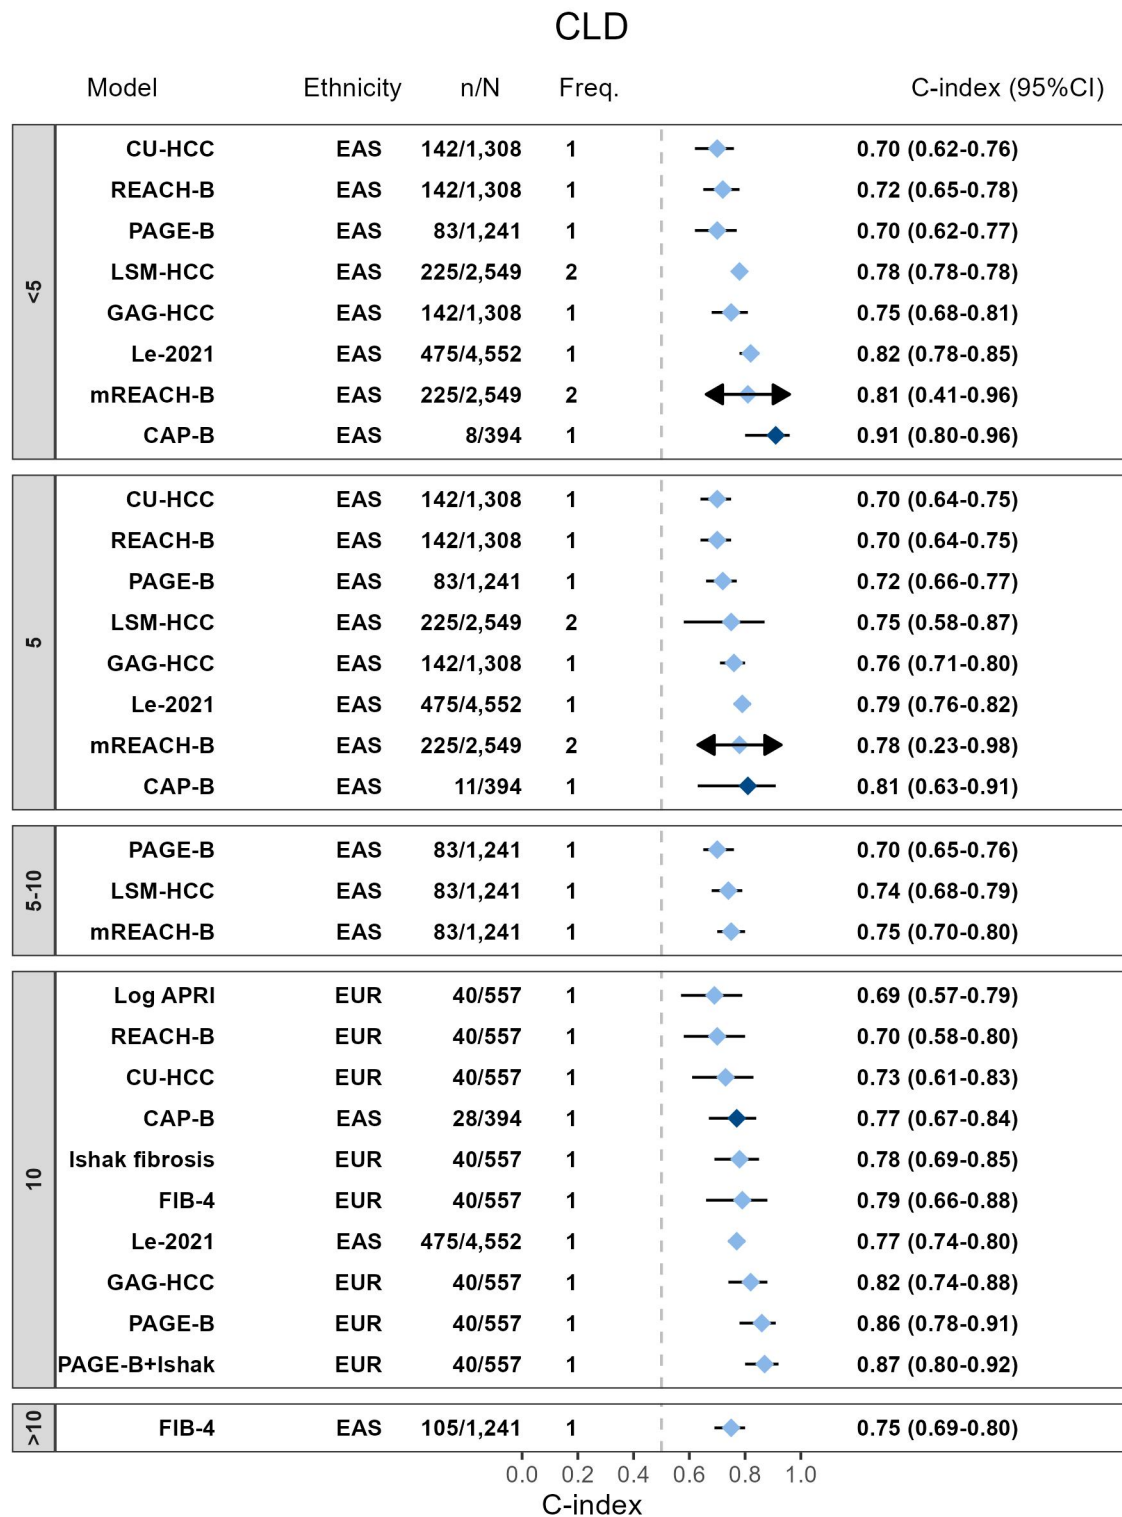

An asterisk (\*) represents a predictive model comprising all non-lab predictors. Dark blue color denotes models externally validated in CKB, while light blue color represents models not externally validated in CKB. "Ethnicity" represents the development population, and "Freq." represents the model's external validation frequency. The REAL-B model was not included due to the population being post-treatment or intervention liver disease patients.



**Fig. S7 Discrimination of CLD risk prediction models in the HCV infected individuals**

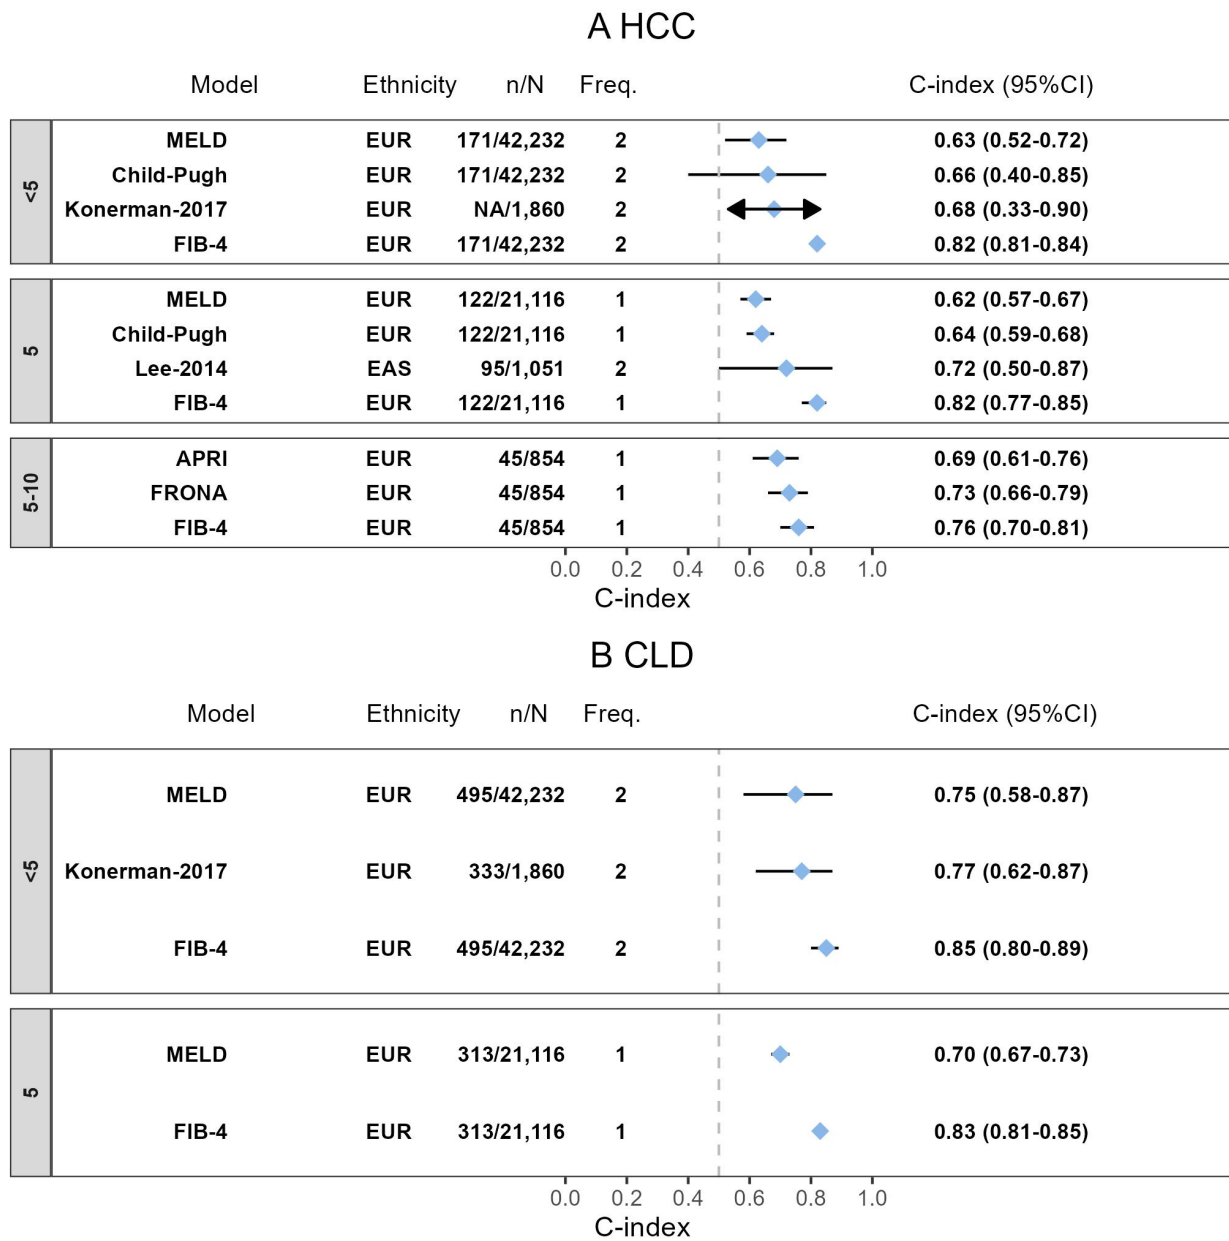

An asterisk (\*) represents a predictive model comprising all non-lab predictors. Dark blue color denotes models externally validated in CKB, while light blue color represents models not externally validated in CKB. "Ethnicity" represents the development population, and "Freq." represents the model's external validation frequency. The REAL-B model was not included due to the population being post-treatment or intervention liver disease patients.

**Fig. S8 Discrimination of CLD risk prediction models in the NAFLD patients**

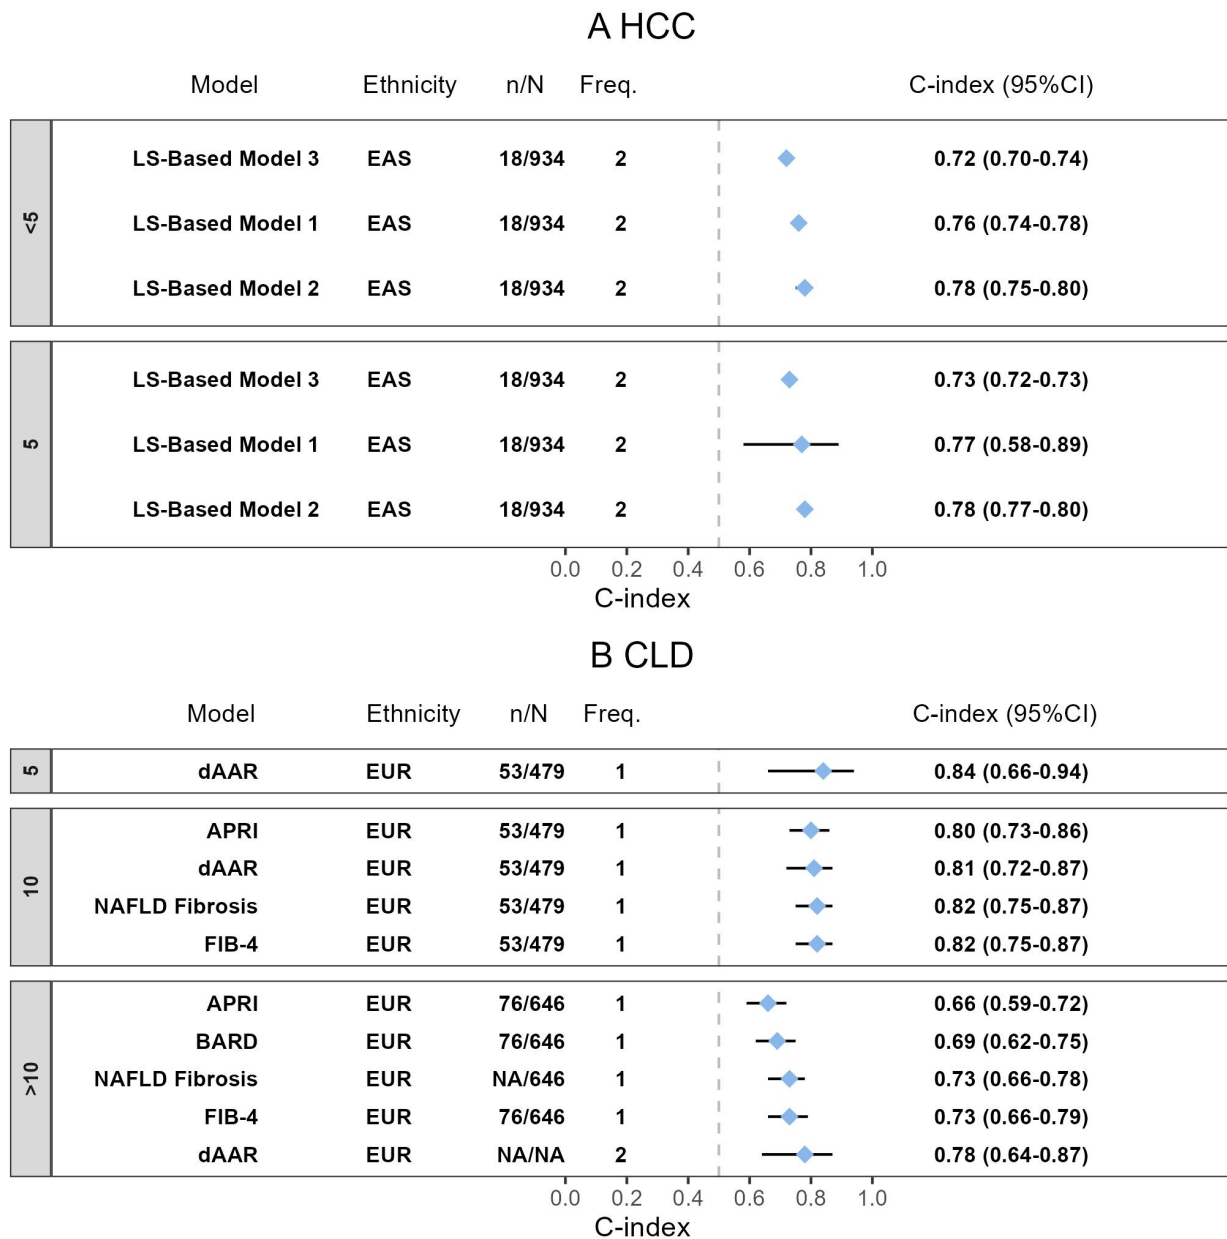

An asterisk (\*) represents a predictive model comprising all non-lab predictors. Dark blue color denotes models externally validated in CKB, while light blue color represents models not externally validated in CKB. "Ethnicity" represents the development population, and "Freq." represents the model's external validation frequency. The REAL-B model was not included due to the population being post-treatment or intervention liver disease patients.
