# Supplementary material for: Comparison of models to predict incident chronic liver disease: a systematic review and external validation in Chinese adults
Source: PubMed Central journal article supplement (PMC11686935; doi:10.1186/s12916-024-03754-9), 2024-12-31
Supplement: 12916_2024_3754_MOESM2_ESM.pdf [file 12916_2024_3754_MOESM2_ESM.pdf]

| DOI                        | Model                     | Objective | Type of validation | Population                                                                 | Start of accrual (year) | End of accrual (year) | End of follow-up (year) | Follow-up (average) | Participant type | Location of centres                                  | Outcome (year-disease)                                                                                           | Parameters                                                                                                                                                                     |
|----------------------------|---------------------------|-----------|--------------------|----------------------------------------------------------------------------|-------------------------|-----------------------|-------------------------|---------------------|------------------|------------------------------------------------------|------------------------------------------------------------------------------------------------------------------|--------------------------------------------------------------------------------------------------------------------------------------------------------------------------------|
| 10.1016/j.jhep.2022.02.021 | CLiVD score (non-lab)     | D         | -                  | FINRISK and Health 2000                                                    | 1992                    | 2012                  | 2016                    | 12.9 years          | general people   | Finland                                              | >10-SLD/advanced liver disease/cirrhosis/liver death                                                             | age, WHR, alcohol use (spline variable), diabetes, smoking status, sex*smoking status                                                                                          |
|                            | CLiVD score (non-lab)     | V         | Internal           | FINRISK and Health 2000                                                    | 1992                    | 2012                  | 2016                    | 12.9 years          | general people   | Finland                                              | >10-SLD/advanced liver disease/cirrhosis/liver death                                                             | age, WHR, alcohol use (spline variable), diabetes, smoking status, sex*smoking status                                                                                          |
|                            | CLiVD score (lab)         | D         | -                  | FINRISK and Health 2000                                                    | 1992                    | 2012                  | 2016                    | 12.9 years          | general people   | Finland                                              | >10-SLD/advanced liver disease/cirrhosis/liver death                                                             | age, WHR, alcohol use (spline variable), GGT, diabetes, smoking status, sex*GGT, sex*smoking status                                                                            |
|                            | CLiVD score (lab)         | V         | Internal           | FINRISK and Health 2000                                                    | 1992                    | 2012                  | 2016                    | 12.9 years          | general people   | Finland                                              | >10-SLD/advanced liver disease/cirrhosis/liver death                                                             | age, WHR, alcohol use (spline variable), GGT, diabetes, smoking status, sex*GGT, sex*smoking status                                                                            |
|                            | CLiVD score (non-lab)     | V         | External           | Whitehall II                                                               | 1997                    | 1999                  | -                       | 21.6 years          | general people   | UK                                                   | >10-SLD/advanced liver disease/cirrhosis/liver death                                                             | age, WHR, alcohol use (spline variable), diabetes, smoking status, sex*smoking status                                                                                          |
|                            | CLiVD score (non-lab)     | V         | External           | CCHS cohorts                                                               | 2001                    | 2002                  | -                       | 16.0 years          | general people   | Denmark                                              | >10-SLD/advanced liver disease/cirrhosis/liver death                                                             | age, WHR, alcohol use (spline variable), diabetes, smoking status, sex*smoking status                                                                                          |
|                            | CLiVD score (lab)         | V         | External           | CCHS cohorts                                                               | 2001                    | 2002                  | -                       | 16.0 years          | general people   | Denmark                                              | >10-SLD/advanced liver disease/cirrhosis/liver death                                                             | age, WHR, alcohol use (spline variable), GGT, diabetes, smoking status, sex*GGT, sex*smoking status                                                                            |
|                            | CLiVD score (non-lab)     | D         | -                  | FINRISK and Health 2000                                                    | 1992                    | 2012                  | 2016                    | 12.9 years          | general people   | Finland                                              | >10-SLD/advanced liver disease/cirrhosis/liver death                                                             | age, WHR, alcohol use (spline variable), GGT, diabetes, smoking status, sex*smoking status                                                                                     |
|                            | CLiVD score (lab)         | D         | -                  | FINRISK and Health 2000                                                    | 1992                    | 2012                  | 2016                    | 12.9 years          | general people   | Finland                                              | >10-SLD/advanced liver disease/cirrhosis/liver death                                                             | age, WHR, alcohol use (spline variable), GGT, diabetes, smoking status, sex*GGT, sex*smoking status                                                                            |
|                            | CLiVD score (non-lab)     | D         | -                  | FINRISK and Health 2000                                                    | 1992                    | 2012                  | 2016                    | 12.9 years          | general people   | Finland                                              | >10-SLD/advanced liver disease/cirrhosis/liver death                                                             | age, WHR, alcohol use (spline variable), GGT, diabetes, smoking status, sex*smoking status                                                                                     |
|                            | CLiVD score (lab)         | D         | -                  | FINRISK and Health 2000                                                    | 1992                    | 2012                  | 2016                    | 12.9 years          | general people   | Finland                                              | >10-SLD/advanced liver disease/cirrhosis/liver death                                                             | age, WHR, alcohol use (spline variable), GGT, diabetes, smoking status, sex*GGT, sex*smoking status                                                                            |
| FIB-4                      | V                         | External  | FINRISK            | 1992                                                                       | 2012                    | 2016                  | 12.9 years              | general people      | Finland          | >10-SLD/advanced liver disease/cirrhosis/liver death | age, AST, ALT, and PLT                                                                                           |                                                                                                                                                                                |
| APRI                       | V                         | External  | FINRISK            | 1992                                                                       | 2012                    | 2016                  | 12.9 years              | general people      | Finland          | >10-SLD/advanced liver disease/cirrhosis/liver death | AST, platelet count                                                                                              |                                                                                                                                                                                |
| 10.1200/jco.2009.26.2675   | Won-2010                  | D         | -                  | Hepatology Clinic at Prince of Wales Hospital (Hong Kong, China), cohort   | 1997                    | 2000                  | -                       | 9.94 years          | HBV infected     | Hong Kong                                            | 10-HCC/PLC/liver cancer                                                                                          | age, albumin, bilirubin, HBV DNA, cirrhosis                                                                                                                                    |
|                            | Won-2010                  | V         | Internal           | Hepatology Clinic at Prince of Wales Hospital (Hong Kong, China), cohort 2 | 1997                    | 2000                  | -                       | 10.53 years         | HBV infected     | Hong Kong                                            | 5-HCC/PLC/liver cancer                                                                                           | age, albumin, bilirubin, HBV DNA, cirrhosis                                                                                                                                    |
|                            | Won-2010                  | V         | Internal           | Hepatology Clinic at Prince of Wales Hospital (Hong Kong, China), cohort 2 | 1997                    | 2000                  | -                       | 10.53 years         | HBV infected     | Hong Kong                                            | 10-HCC/PLC/liver cancer                                                                                          | age, albumin, bilirubin, HBV DNA, cirrhosis                                                                                                                                    |
|                            | Won-2010                  | V         | Internal           | Hepatology Clinic at Prince of Wales Hospital (Hong Kong, China), cohort 2 | 1997                    | 2000                  | -                       | 10.53 years         | HBV infected     | Hong Kong                                            | 10-HCC/PLC/liver cancer                                                                                          | age, albumin, bilirubin, HBV DNA, cirrhosis                                                                                                                                    |
| 10.1200/jco.2009.27.4456   | Model 1- regression model | D         | -                  | REVEAL-HBV                                                                 | 1991                    | 1992                  | -                       | -                   | HBV infected     | Taiwan                                               | 5-HCC/PLC/liver cancer                                                                                           | sex, age in 5-year increments, family history of hepatocellular carcinoma, and serum ALT level, HBeAg serostatus                                                               |
|                            | Model 1- regression model | V         | Internal           | REVEAL-HBV                                                                 | 1991                    | 1992                  | -                       | -                   | HBV infected     | Taiwan                                               | 5-HCC/PLC/liver cancer                                                                                           | sex, age in 5-year increments, family history of hepatocellular carcinoma, and serum ALT level, HBeAg serostatus                                                               |
|                            | Model 1- regression model | D         | -                  | REVEAL-HBV                                                                 | 1991                    | 1992                  | -                       | -                   | HBV infected     | Taiwan                                               | 10-HCC/PLC/liver cancer                                                                                          | sex, age in 5-year increments, family history of hepatocellular carcinoma, and serum ALT level, HBeAg serostatus                                                               |
|                            | Model 1- regression model | V         | Internal           | REVEAL-HBV                                                                 | 1991                    | 1992                  | -                       | -                   | HBV infected     | Taiwan                                               | 10-HCC/PLC/liver cancer                                                                                          | sex, age in 5-year increments, family history of hepatocellular carcinoma, and serum ALT level, HBeAg serostatus                                                               |
|                            | Model 2-regression model  | D         | -                  | REVEAL-HBV                                                                 | 1991                    | 1992                  | -                       | -                   | HBV infected     | Taiwan                                               | 5-HCC/PLC/liver cancer                                                                                           | sex, age in 5-year increments, family history of hepatocellular carcinoma, and serum ALT level, a combined variable comprising HBeAg and serum HBV DNA level                   |
|                            | Model 2-regression model  | V         | Internal           | REVEAL-HBV                                                                 | 1991                    | 1992                  | -                       | -                   | HBV infected     | Taiwan                                               | 5-HCC/PLC/liver cancer                                                                                           | sex, age in 5-year increments, family history of hepatocellular carcinoma, and serum ALT level, a combined variable comprising HBeAg and serum HBV DNA level                   |
|                            | Model 2-regression model  | D         | -                  | REVEAL-HBV                                                                 | 1991                    | 1992                  | -                       | -                   | HBV infected     | Taiwan                                               | 10-HCC/PLC/liver cancer                                                                                          | sex, age in 5-year increments, family history of hepatocellular carcinoma, and serum ALT level, a combined variable comprising HBeAg and serum HBV DNA level                   |
|                            | Model 2-regression model  | V         | Internal           | REVEAL-HBV                                                                 | 1991                    | 1992                  | -                       | -                   | HBV infected     | Taiwan                                               | 10-HCC/PLC/liver cancer                                                                                          | sex, age in 5-year increments, family history of hepatocellular carcinoma, and serum ALT level, a combined variable comprising HBeAg and serum HBV DNA level                   |
|                            | Model 3-regression model  | D         | -                  | REVEAL-HBV                                                                 | 1991                    | 1992                  | -                       | -                   | HBV infected     | Taiwan                                               | 5-HCC/PLC/liver cancer                                                                                           | sex, age in 5-year increments, family history of hepatocellular carcinoma, and serum ALT level, a combined variable consisting of HBeAg, serum HBV DNA level, and HBV genotype |
|                            | Model 3-regression model  | V         | Internal           | REVEAL-HBV                                                                 | 1991                    | 1992                  | -                       | -                   | HBV infected     | Taiwan                                               | 5-HCC/PLC/liver cancer                                                                                           | sex, age in 5-year increments, family history of hepatocellular carcinoma, and serum ALT level, a combined variable consisting of HBeAg, serum HBV DNA level, and HBV genotype |
|                            | Model 3-regression model  | D         | -                  | REVEAL-HBV                                                                 | 1991                    | 1992                  | -                       | -                   | HBV infected     | Taiwan                                               | 10-HCC/PLC/liver cancer                                                                                          | sex, age in 5-year increments, family history of hepatocellular carcinoma, and serum ALT level, a combined variable consisting of HBeAg, serum HBV DNA level, and HBV genotype |
|                            | Model 3-regression model  | V         | Internal           | REVEAL-HBV                                                                 | 1991                    | 1992                  | -                       | -                   | HBV infected     | Taiwan                                               | 10-HCC/PLC/liver cancer                                                                                          | sex, age in 5-year increments, family history of hepatocellular carcinoma, and serum ALT level, a combined variable consisting of HBeAg, serum HBV DNA level, and HBV genotype |
|                            | NGMI-HCC                  | D         | -                  | REVEAL-HBV                                                                 | 1991                    | 1992                  | -                       | -                   | HBV infected     | Taiwan                                               | 5-HCC/PLC/liver cancer                                                                                           | sex, age in 5-year increments, family history of hepatocellular carcinoma, and serum ALT level, HBeAg serostatus                                                               |
|                            | NGMI-HCC                  | V         | Internal           | REVEAL-HBV                                                                 | 1991                    | 1992                  | -                       | -                   | HBV infected     | Taiwan                                               | 5-HCC/PLC/liver cancer                                                                                           | sex, age in 5-year increments, family history of hepatocellular carcinoma, and serum ALT level, HBeAg serostatus                                                               |
| NGMI-HCC                   | D                         | -         | REVEAL-HBV         | 1991                                                                       | 1992                    | -                     | -                       | HBV infected        | Taiwan           | 10-HCC/PLC/liver cancer                              | sex, age in 5-year increments, family history of hepatocellular carcinoma, and serum ALT level, HBeAg serostatus |                                                                                                                                                                                |

|                               |                                       |          |                                  |                                                                                                                                                                   |      |      |           |              |              |                         |                                                                                     |                                                                                                                                                                                |
|-------------------------------|---------------------------------------|----------|----------------------------------|-------------------------------------------------------------------------------------------------------------------------------------------------------------------|------|------|-----------|--------------|--------------|-------------------------|-------------------------------------------------------------------------------------|--------------------------------------------------------------------------------------------------------------------------------------------------------------------------------|
|                               | NGM1-HCC                              | V        | Internal                         | REVEAL-HBV                                                                                                                                                        | 1991 | 1992 | -         | -            | HBV infected | Taiwan                  | 10-HCC/PLC/liver cancer                                                             | sex, age in 5-year increments, family history of hepatocellular carcinoma, and serum ALT level, HBeAg serostatus                                                               |
|                               | NGM2-HCC                              | D        | -                                | REVEAL-HBV                                                                                                                                                        | 1991 | 1992 | -         | -            | HBV infected | Taiwan                  | 5-HCC/PLC/liver cancer                                                              | sex, age in 5-year increments, family history of hepatocellular carcinoma, and serum ALT level, a combined variable comprising HBeAg and serum HBV DNA level                   |
|                               | NGM2-HCC                              | V        | Internal                         | REVEAL-HBV                                                                                                                                                        | 1991 | 1992 | -         | -            | HBV infected | Taiwan                  | 5-HCC/PLC/liver cancer                                                              | sex, age in 5-year increments, family history of hepatocellular carcinoma, and serum ALT level, a combined variable comprising HBeAg and serum HBV DNA level                   |
|                               | NGM2-HCC                              | D        | -                                | REVEAL-HBV                                                                                                                                                        | 1991 | 1992 | -         | -            | HBV infected | Taiwan                  | 10-HCC/PLC/liver cancer                                                             | sex, age in 5-year increments, family history of hepatocellular carcinoma, and serum ALT level, a combined variable comprising HBeAg and serum HBV DNA level                   |
|                               | NGM2-HCC                              | V        | Internal                         | REVEAL-HBV                                                                                                                                                        | 1991 | 1992 | -         | -            | HBV infected | Taiwan                  | 10-HCC/PLC/liver cancer                                                             | sex, age in 5-year increments, family history of hepatocellular carcinoma, and serum ALT level, a combined variable comprising HBeAg and serum HBV DNA level                   |
|                               | NGM3-HCC                              | D        | -                                | REVEAL-HBV                                                                                                                                                        | 1991 | 1992 | -         | -            | HBV infected | Taiwan                  | 5-HCC/PLC/liver cancer                                                              | sex, age in 5-year increments, family history of hepatocellular carcinoma, and serum ALT level, a combined variable consisting of HBeAg, serum HBV DNA level, and HRV genotype |
|                               | NGM3-HCC                              | V        | Internal                         | REVEAL-HBV                                                                                                                                                        | 1991 | 1992 | -         | -            | HBV infected | Taiwan                  | 5-HCC/PLC/liver cancer                                                              | sex, age in 5-year increments, family history of hepatocellular carcinoma, and serum ALT level, a combined variable consisting of HBeAg, serum HBV DNA level, and HRV genotype |
|                               | NGM3-HCC                              | D        | -                                | REVEAL-HBV                                                                                                                                                        | 1991 | 1992 | -         | -            | HBV infected | Taiwan                  | 10-HCC/PLC/liver cancer                                                             | sex, age in 5-year increments, family history of hepatocellular carcinoma, and serum ALT level, a combined variable consisting of HBeAg, serum HBV DNA level, and HRV genotype |
|                               | NGM3-HCC                              | V        | Internal                         | REVEAL-HBV                                                                                                                                                        | 1991 | 1992 | -         | -            | HBV infected | Taiwan                  | 10-HCC/PLC/liver cancer                                                             | sex, age in 5-year increments, family history of hepatocellular carcinoma, and serum ALT level, a combined variable consisting of HBeAg, serum HBV DNA level, and HRV genotype |
| 10.1016/j.jhep.2008.07.023    | GAG-HCC                               | D        | -                                | Queen Mary Hospital, Hong Kong.                                                                                                                                   | 1995 | 2005 | -         | 76.8 months  | HBV infected | Hong Kong               | 5-HCC/PLC/liver cancer                                                              | sex, age, HBV DNA levels in copies/mL in log, cirrhosis, core promoter mutations                                                                                               |
|                               | GAG-HCC                               | D        | -                                | Queen Mary Hospital, Hong Kong.                                                                                                                                   | 1995 | 2005 | -         | 76.8 months  | HBV infected | Hong Kong               | 5-HCC/PLC/liver cancer                                                              | sex, age, HBV DNA levels in copies/mL in log, cirrhosis, core promoter mutations                                                                                               |
|                               | GAG-HCC (non core promoter mutations) | D        | -                                | Queen Mary Hospital, Hong Kong.                                                                                                                                   | 1995 | 2005 | -         | 76.8 months  | HBV infected | Hong Kong               | 10-HCC/PLC/liver cancer                                                             | sex, age, HBV DNA levels in copies/mL in log, cirrhosis                                                                                                                        |
|                               | GAG-HCC (non core promoter mutations) | D        | -                                | Queen Mary Hospital, Hong Kong.                                                                                                                                   | 1995 | 2005 | -         | 76.8 months  | HBV infected | Hong Kong               | 10-HCC/PLC/liver cancer                                                             | sex, age, HBV DNA levels in copies/mL in log, cirrhosis                                                                                                                        |
| 10.1016/s1470-2045(11)70077-8 | REACH-B                               | D        | -                                | REVEAL-HBV                                                                                                                                                        | 1991 | 1992 | -         | -            | HBV infected | Taiwan                  | <5-HCC/PLC/liver cancer                                                             | sex, age, serum ALT concentration, HBeAg status, serum HBV DNA level (by PCR assay)                                                                                            |
|                               | REACH-B                               | D        | -                                | REVEAL-HBV                                                                                                                                                        | 1991 | 1992 | -         | -            | HBV infected | Taiwan                  | 5-HCC/PLC/liver cancer                                                              | sex, age, serum ALT concentration, HBeAg status, serum HBV DNA level (by PCR assay)                                                                                            |
|                               | REACH-B                               | D        | -                                | REVEAL-HBV                                                                                                                                                        | 1991 | 1992 | -         | -            | HBV infected | Taiwan                  | 10-HCC/PLC/liver cancer                                                             | sex, age, serum ALT concentration, HBeAg status, serum HBV DNA level (by PCR assay)                                                                                            |
|                               | REACH-B                               | V        | External                         | hospital-based composite international cohort                                                                                                                     | -    | -    | -         | -            | HBV infected | Hong Kong, Yonsei       | <5-HCC/PLC/liver cancer                                                             | sex, age, serum ALT concentration, HBeAg status, serum HBV DNA level (by PCR assay)                                                                                            |
|                               | REACH-B                               | V        | External                         | hospital-based composite international cohort                                                                                                                     | -    | -    | -         | -            | HBV infected | Hong Kong, Yonsei       | 5-HCC/PLC/liver cancer                                                              | sex, age, serum ALT concentration, HBeAg status, serum HBV DNA level (by PCR assay)                                                                                            |
|                               | REACH-B                               | V        | External                         | hospital-based composite international cohort                                                                                                                     | -    | -    | -         | -            | HBV infected | Hong Kong, Yonsei       | 10-HCC/PLC/liver cancer                                                             | sex, age, serum ALT concentration, HBeAg status, serum HBV DNA level (by PCR assay)                                                                                            |
|                               | REACH-B                               | V        | External                         | University of Hong Kong (UHK)                                                                                                                                     | -    | -    | -         | 6.3 years    | HBV infected | Hong Kong               | <5-HCC/PLC/liver cancer                                                             | sex, age, serum ALT concentration, HBeAg status, serum HBV DNA level (by PCR assay)                                                                                            |
|                               | REACH-B                               | V        | External                         | University of Hong Kong (UHK)                                                                                                                                     | -    | -    | -         | 6.3 years    | HBV infected | Hong Kong               | 5-HCC/PLC/liver cancer                                                              | sex, age, serum ALT concentration, HBeAg status, serum HBV DNA level (by PCR assay)                                                                                            |
|                               | REACH-B                               | V        | External                         | University of Hong Kong (UHK)                                                                                                                                     | -    | -    | -         | 6.3 years    | HBV infected | Hong Kong               | 10-HCC/PLC/liver cancer                                                             | sex, age, serum ALT concentration, HBeAg status, serum HBV DNA level (by PCR assay)                                                                                            |
|                               | REACH-B                               | V        | External                         | Chinese University of Hong Kong (CUHK)                                                                                                                            | -    | -    | -         | 9.4 years    | HBV infected | Hong Kong               | <5-HCC/PLC/liver cancer                                                             | sex, age, serum ALT concentration, HBeAg status, serum HBV DNA level (by PCR assay)                                                                                            |
|                               | REACH-B                               | V        | External                         | Chinese University of Hong Kong (CUHK)                                                                                                                            | -    | -    | -         | 9.4 years    | HBV infected | Hong Kong               | 5-HCC/PLC/liver cancer                                                              | sex, age, serum ALT concentration, HBeAg status, serum HBV DNA level (by PCR assay)                                                                                            |
|                               | REACH-B                               | V        | External                         | Chinese University of Hong Kong (CUHK)                                                                                                                            | -    | -    | -         | 9.4 years    | HBV infected | Hong Kong               | 10-HCC/PLC/liver cancer                                                             | sex, age, serum ALT concentration, HBeAg status, serum HBV DNA level (by PCR assay)                                                                                            |
|                               | REACH-B                               | V        | External                         | Yonsei University Hospital (YUH)                                                                                                                                  | -    | -    | -         | 7.0 years    | HBV infected | Yonsei                  | <5-HCC/PLC/liver cancer                                                             | sex, age, serum ALT concentration, HBeAg status, serum HBV DNA level (by PCR assay)                                                                                            |
| REACH-B                       | V                                     | External | Yonsei University Hospital (YUH) | -                                                                                                                                                                 | -    | -    | 7.0 years | HBV infected | Yonsei       | 5-HCC/PLC/liver cancer  | sex, age, serum ALT concentration, HBeAg status, serum HBV DNA level (by PCR assay) |                                                                                                                                                                                |
| REACH-B                       | V                                     | External | Yonsei University Hospital (YUH) | -                                                                                                                                                                 | -    | -    | 7.0 years | HBV infected | Yonsei       | 10-HCC/PLC/liver cancer | sex, age, serum ALT concentration, HBeAg status, serum HBV DNA level (by PCR assay) |                                                                                                                                                                                |
| 10.1016/j.jhep.2011.09.011    | Kuroski-2012                          | D        | -                                | Musashino Red Cross Hospital                                                                                                                                      | -    | -    | -         | -            | HCV infected | Japan                   | 5-HCC/PLC/liver cancer                                                              | age, albumin levels, platelet count                                                                                                                                            |
|                               | Kuroski-2012                          | V        | External                         | patients in University of Yamanashi, Tokyo Medical and Dental University, Osaka University, Osaka City University, Nagoya City University, or Toranomon Hospital. | -    | -    | -         | -            | HCV infected | Japan                   | 5-HCC/PLC/liver cancer                                                              | age, albumin levels, platelet count                                                                                                                                            |

|                             |                            |                  |          |                                                                                                              |                                                                                                              |      |      |            |                |              |                                                     |                                                                                                           |
|-----------------------------|----------------------------|------------------|----------|--------------------------------------------------------------------------------------------------------------|--------------------------------------------------------------------------------------------------------------|------|------|------------|----------------|--------------|-----------------------------------------------------|-----------------------------------------------------------------------------------------------------------|
| 10.1016/j.yjmed.2012.05.017 | Kurosaki-2012              | D                | -        | JPHC Study Cohort II                                                                                         | 1993                                                                                                         | 1994 | 2006 | 12.6 years | general people | Japan        | 10-HCC/PLC/liver cancer                             | age, sex, alcohol consumption, BMI, diabetes, coffee consumption, HBV/HCV infection status.               |
|                             | Kurosaki-2012              | V                | Internal | JPHC Study Cohort II                                                                                         | 1993                                                                                                         | 1994 | 2006 | 12.6 years | general people | Japan        | 10-HCC/PLC/liver cancer                             | age, sex, alcohol consumption, BMI, diabetes, coffee consumption, HBV/HCV infection status.               |
| 10.1093/jnci/djs72          | Wen 1-2012                 | D                | -        | MJ cohort                                                                                                    | 1994                                                                                                         | -    | 2008 | 8.5 years  | general people | Taiwan       | 10-HCC/PLC/liver cancer                             | age, sex, pack-year of smoking, alcohol drinking, physical activity, diabetes                             |
|                             | Wen 2-2012                 | D                | -        | MJ cohort                                                                                                    | 1994                                                                                                         | -    | 2008 | 8.5 years  | general people | Taiwan       | 10-HCC/PLC/liver cancer                             | age, sex, AST, ALT                                                                                        |
|                             | Wen 3-2012                 | D                | -        | MJ cohort                                                                                                    | 1994                                                                                                         | -    | 2008 | 8.5 years  | general people | Taiwan       | 10-HCC/PLC/liver cancer                             | age, sex, pack-year of smoking, alcohol drinking, physical activity, diabetes, AST, and ALT               |
|                             | Wen 4-2012                 | D                | -        | MJ cohort                                                                                                    | 1994                                                                                                         | -    | 2008 | 8.5 years  | general people | Taiwan       | 10-HCC/PLC/liver cancer                             | age, sex, pack-year of smoking, alcohol drinking, physical activity, diabetes, AST, ALT, AFP, and HBV     |
|                             | Wen 1-2012                 | V                | Internal | MJ cohort                                                                                                    | 1994                                                                                                         | -    | 2008 | 8.5 years  | general people | Taiwan       | 10-HCC/PLC/liver cancer                             | age, sex, pack-year of smoking, alcohol drinking, physical activity, diabetes                             |
|                             | Wen 2-2012                 | V                | Internal | MJ cohort                                                                                                    | 1994                                                                                                         | -    | 2008 | 8.5 years  | general people | Taiwan       | 10-HCC/PLC/liver cancer                             | age, sex, AST, ALT                                                                                        |
|                             | Wen 3-2012                 | V                | Internal | MJ cohort                                                                                                    | 1994                                                                                                         | -    | 2008 | 8.5 years  | general people | Taiwan       | 10-HCC/PLC/liver cancer                             | age, sex, pack-year of smoking, alcohol drinking, physical activity, diabetes, AST, and ALT               |
|                             | Wen 4-2012                 | V                | Internal | MJ cohort                                                                                                    | 1994                                                                                                         | -    | 2008 | 8.5 years  | general people | Taiwan       | 10-HCC/PLC/liver cancer                             | age, sex, pack-year of smoking, alcohol drinking, physical activity, diabetes, AST, ALT, AFP, and HBV     |
|                             | Wen 1-2012                 | D+V              | -        | MJ cohort                                                                                                    | 1994                                                                                                         | -    | 2008 | 8.5 years  | general people | Taiwan       | 10-HCC/PLC/liver cancer                             | age, sex, pack-year of smoking, alcohol drinking, physical activity, diabetes                             |
|                             | Wen 2-2012                 | D+V              | -        | MJ cohort                                                                                                    | 1994                                                                                                         | -    | 2008 | 8.5 years  | general people | Taiwan       | 10-HCC/PLC/liver cancer                             | age, sex, AST, ALT                                                                                        |
|                             | Wen 3-2012                 | D+V              | -        | MJ cohort                                                                                                    | 1994                                                                                                         | -    | 2008 | 8.5 years  | general people | Taiwan       | 10-HCC/PLC/liver cancer                             | age, sex, pack-year of smoking, alcohol drinking, physical activity, diabetes, AST, and ALT               |
|                             | Wen 4-2012                 | D+V              | -        | MJ cohort                                                                                                    | 1994                                                                                                         | -    | 2008 | 8.5 years  | general people | Taiwan       | 10-HCC/PLC/liver cancer                             | age, sex, pack-year of smoking, alcohol drinking, physical activity, diabetes, AST, ALT, AFP, and HBV     |
|                             | Wen 1'-2012                | D                | -        | MJ cohort                                                                                                    | 1994                                                                                                         | -    | 2008 | 8.5 years  | general people | Taiwan       | 10-HCC/PLC/liver cancer                             | age, sex, pack-year of smoking, alcohol drinking, physical activity, diabetes                             |
|                             | Wen 2'-2012                | D                | -        | MJ cohort                                                                                                    | 1994                                                                                                         | -    | 2008 | 8.5 years  | general people | Taiwan       | 10-HCC/PLC/liver cancer                             | age, sex, AST, ALT                                                                                        |
|                             | Wen 3'-2012                | D                | -        | MJ cohort                                                                                                    | 1994                                                                                                         | -    | 2008 | 8.5 years  | general people | Taiwan       | 10-HCC/PLC/liver cancer                             | age, sex, pack-year of smoking, alcohol drinking, physical activity, diabetes, AST, and ALT               |
|                             | Wen 4'-2012                | D                | -        | MJ cohort                                                                                                    | 1994                                                                                                         | -    | 2008 | 8.5 years  | general people | Taiwan       | 10-HCC/PLC/liver cancer                             | age, sex, pack-year of smoking, alcohol drinking, physical activity, diabetes, AST, ALT, AFP, and HBV     |
|                             | Wen 5'-2012                | D                | -        | MJ cohort                                                                                                    | 1994                                                                                                         | -    | 2008 | 8.5 years  | general people | Taiwan       | 10-HCC/PLC/liver cancer                             | age, sex, pack-year of smoking, alcohol drinking, physical activity, diabetes, AST, ALT, AFP, HBV and HCV |
|                             | Wen 1''-2012               | V                | Internal | MJ cohort                                                                                                    | 1994                                                                                                         | -    | 2008 | 8.5 years  | general people | Taiwan       | 10-HCC/PLC/liver cancer                             | age, sex, pack-year of smoking, alcohol drinking, physical activity, diabetes                             |
|                             | Wen 2''-2012               | V                | Internal | MJ cohort                                                                                                    | 1994                                                                                                         | -    | 2008 | 8.5 years  | general people | Taiwan       | 10-HCC/PLC/liver cancer                             | age, sex, AST, ALT                                                                                        |
|                             | Wen 3''-2012               | V                | Internal | MJ cohort                                                                                                    | 1994                                                                                                         | -    | 2008 | 8.5 years  | general people | Taiwan       | 10-HCC/PLC/liver cancer                             | age, sex, pack-year of smoking, alcohol drinking, physical activity, diabetes, AST, and ALT               |
|                             | Wen 4''-2012               | V                | Internal | MJ cohort                                                                                                    | 1994                                                                                                         | -    | 2008 | 8.5 years  | general people | Taiwan       | 10-HCC/PLC/liver cancer                             | age, sex, pack-year of smoking, alcohol drinking, physical activity, diabetes, AST, ALT, AFP, and HBV     |
|                             | Wen 5''-2012               | V                | Internal | MJ cohort                                                                                                    | 1994                                                                                                         | -    | 2008 | 8.5 years  | general people | Taiwan       | 10-HCC/PLC/liver cancer                             | age, sex, pack-year of smoking, alcohol drinking, physical activity, diabetes, AST, ALT, AFP, HBV and HCV |
|                             | Wen 1'''-2012              | D+V              | -        | MJ cohort                                                                                                    | 1994                                                                                                         | -    | 2008 | 8.5 years  | general people | Taiwan       | 10-HCC/PLC/liver cancer                             | age, sex, pack-year of smoking, alcohol drinking, physical activity, diabetes                             |
|                             | Wen 2'''-2012              | D+V              | -        | MJ cohort                                                                                                    | 1994                                                                                                         | -    | 2008 | 8.5 years  | general people | Taiwan       | 10-HCC/PLC/liver cancer                             | age, sex, AST, ALT                                                                                        |
|                             | Wen 3'''-2012              | D+V              | -        | MJ cohort                                                                                                    | 1994                                                                                                         | -    | 2008 | 8.5 years  | general people | Taiwan       | 10-HCC/PLC/liver cancer                             | age, sex, pack-year of smoking, alcohol drinking, physical activity, diabetes, AST, and ALT               |
|                             | Wen 4'''-2012              | D+V              | -        | MJ cohort                                                                                                    | 1994                                                                                                         | -    | 2008 | 8.5 years  | general people | Taiwan       | 10-HCC/PLC/liver cancer                             | age, sex, pack-year of smoking, alcohol drinking, physical activity, diabetes, AST, ALT, AFP, and HBV     |
|                             | Wen 5'''-2012              | D+V              | -        | MJ cohort                                                                                                    | 1994                                                                                                         | -    | 2008 | 8.5 years  | general people | Taiwan       | 10-HCC/PLC/liver cancer                             | age, sex, pack-year of smoking, alcohol drinking, physical activity, diabetes, AST, ALT, AFP, HBV and HCV |
|                             | 10.1016/j.ejim.2013.06.010 | HCC-4 Risk Score | D        | -                                                                                                            | the hepatology section of the Internal Medicine Department in Hospital Virgen de laVictoria in Málaga, Spain | 1993 | 2010 | -          | 82 months      | HCV infected | Spain                                               | 5-10-HCC/PLC/liver cancer                                                                                 |
| FRONA                       |                            | V                | External | the hepatology section of the Internal Medicine Department in Hospital Virgen de laVictoria in Málaga, Spain | 1993                                                                                                         | 2010 | -    | 82 months  | HCV infected   | Spain        | 5-10-HCC/PLC/liver cancer                           | -                                                                                                         |
| APRI                        |                            | V                | External | the hepatology section of the Internal Medicine Department in Hospital Virgen de laVictoria in Málaga, Spain | 1993                                                                                                         | 2010 | -    | 82 months  | HCV infected   | Spain        | 5-10-HCC/PLC/liver cancer                           | AST, platelet count                                                                                       |
| FIB-4                       |                            | V                | External | the hepatology section of the Internal Medicine Department in Hospital Virgen de laVictoria in Málaga, Spain | 1993                                                                                                         | 2010 | -    | 82 months  | HCV infected   | Spain        | 5-10-HCC/PLC/liver cancer                           | age, AST, ALT, and PLT                                                                                    |
| 10.1016/j.yjmed.2012.05.017 | Lee-2013                   | D                | -        | REVEAL-HBV                                                                                                   | 1991                                                                                                         | 1992 | -    | -          | HBV infected   | Taiwan       | <5-SLD/advanced liver disease/cirrhosis/liver death | age, gender, HBVe antigen (HBeAg) serostatus, serum levels of HBV DNA and alanine aminotransferase (ALT)  |
|                             | Lee-2013                   | D                | -        | REVEAL-HBV                                                                                                   | 1991                                                                                                         | 1992 | -    | -          | HBV infected   | Taiwan       | 5-SLD/advanced liver disease/cirrhosis/liver death  | age, gender, HBVe antigen (HBeAg) serostatus, serum levels of HBV DNA and alanine aminotransferase (ALT)  |
|                             | Lee-2013                   | D                | -        | REVEAL-HBV                                                                                                   | 1991                                                                                                         | 1992 | -    | -          | HBV infected   | Taiwan       | 10-SLD/advanced liver disease/cirrhosis/liver death | age, gender, HBVe antigen (HBeAg) serostatus, serum levels of HBV DNA and alanine aminotransferase (ALT)  |
|                             | Lee-2013                   | V                | Internal | REVEAL-HBV                                                                                                   | 1991                                                                                                         | 1992 | -    | -          | HBV infected   | Taiwan       | <5-SLD/advanced liver disease/cirrhosis/liver death | age, gender, HBVe antigen (HBeAg) serostatus, serum levels of HBV DNA and alanine aminotransferase (ALT)  |

|                                |                      |   |             |                                                                                  |      |      |           |                |                  |                         |                                                     |                                                                                                                                                 |
|--------------------------------|----------------------|---|-------------|----------------------------------------------------------------------------------|------|------|-----------|----------------|------------------|-------------------------|-----------------------------------------------------|-------------------------------------------------------------------------------------------------------------------------------------------------|
| 10.1002/hep.26385              | Lee-2013             | V | Internal    | REVEAL-HBV                                                                       | 1991 | 1992 | -         | -              | HBV infected     | Taiwan                  | 5-5LD/advanced liver disease/cirrhosis/liver death  | age, gender, HBVe antigen (HBeAg) serostatus, serum levels of HBV DNA and alanine aminotransferase (ALT)                                        |
|                                | Lee-2013             | V | Internal    | REVEAL-HBV                                                                       | 1991 | 1992 | -         | -              | HBV infected     | Taiwan                  | 10-5LD/advanced liver disease/cirrhosis/liver death | age, gender, HBVe antigen (HBeAg) serostatus, serum levels of HBV DNA and alanine aminotransferase (ALT)                                        |
|                                | Lee-2013             | D | -           | REVEAL-HBV                                                                       | 1991 | 1992 | -         | -              | HBV infected     | Taiwan                  | <5-HCC/PLC/liver cancer                             | age, gender, HBVe antigen (HBeAg) serostatus, serum levels of HBV DNA, alanine aminotransferase (ALT) and family history                        |
|                                | Lee-2013             | D | -           | REVEAL-HBV                                                                       | 1991 | 1992 | -         | -              | HBV infected     | Taiwan                  | 5-HCC/PLC/liver cancer                              | age, gender, HBVe antigen (HBeAg) serostatus, serum levels of HBV DNA, alanine aminotransferase (ALT) and family history                        |
|                                | Lee-2013             | D | -           | REVEAL-HBV                                                                       | 1991 | 1992 | -         | -              | HBV infected     | Taiwan                  | 10-HCC/PLC/liver cancer                             | age, gender, HBVe antigen (HBeAg) serostatus, serum levels of HBV DNA, alanine aminotransferase (ALT) and family history                        |
|                                | Lee-2013             | V | Internal    | REVEAL-HBV                                                                       | 1991 | 1992 | -         | -              | HBV infected     | Taiwan                  | <5-HCC/PLC/liver cancer                             | age, gender, HBVe antigen (HBeAg) serostatus, serum levels of HBV DNA, alanine aminotransferase (ALT) and family history                        |
|                                | Lee-2013             | V | Internal    | REVEAL-HBV                                                                       | 1991 | 1992 | -         | -              | HBV infected     | Taiwan                  | 5-HCC/PLC/liver cancer                              | age, gender, HBVe antigen (HBeAg) serostatus, serum levels of HBV DNA, alanine aminotransferase (ALT) and family history                        |
| 10.1371/journal.pone.0061448   | Lin-Model I          | D | -           | REVEAL-HBV                                                                       | 1991 | 1992 | 2008      | 5.9 year       | HBV infected     | Taiwan                  | 5-10-HCC/PLC/liver cancer                           | age, gender, serum ALT levels, and HBV seromarkers                                                                                              |
|                                | Lin-Model II         | D | -           | REVEAL-HBV                                                                       | 1991 | 1992 | 2008      | 5.9 year       | HBV infected     | Taiwan                  | 5-10-HCC/PLC/liver cancer                           | age, gender, and the liver-related seromarkers ALT, AAR, AFP, GGT, albumin, and alpha-1 globulin                                                |
|                                | Lin-Model III        | D | -           | REVEAL-HBV                                                                       | 1991 | 1992 | 2008      | 5.9 year       | HBV infected     | Taiwan                  | 5-10-HCC/PLC/liver cancer                           | age, gender, and the liver-related seromarkers ALT, AAR, AFP, GGT, albumin, alpha-1 globulin and HBV seromarkers                                |
| 10.1371/journal.pone.0094760   | Lee-2014             | D | -           | R.E.V.E.A.L.-HCV Cohort                                                          | 1991 | 1992 | 2008      | -              | HCV infected     | Taiwan                  | 5-HCC/PLC/liver cancer                              | age, alanine aminotransferase (ALT), the ratio of aspartate aminotransferase to ALT, serum HCV RNA levels and cirrhosis status and HCV genotype |
|                                | Lee-2014             | D | -           | R.E.V.E.A.L.-HCV Cohort                                                          | 1991 | 1992 | 2008      | -              | HCV infected     | Taiwan                  | 10-HCC/PLC/liver cancer                             | age, alanine aminotransferase (ALT), the ratio of aspartate aminotransferase to ALT, serum HCV RNA levels and cirrhosis status and HCV genotype |
|                                | Lee-2014             | D | -           | R.E.V.E.A.L.-HCV Cohort                                                          | 1991 | 1992 | 2008      | -              | HCV infected     | Taiwan                  | >10-HCC/PLC/liver cancer                            | age, alanine aminotransferase (ALT), the ratio of aspartate aminotransferase to ALT, serum HCV RNA levels and cirrhosis status and HCV genotype |
|                                | Lee-2014             | D | -           | R.E.V.E.A.L.-HCV Cohort                                                          | 1991 | 1992 | 2008      | -              | HCV infected     | Taiwan                  | 5-HCC/PLC/liver cancer                              | age, alanine aminotransferase (ALT), the ratio of aspartate aminotransferase to ALT, serum HCV RNA levels and cirrhosis status and HCV genotype |
|                                | Lee-2014             | D | -           | R.E.V.E.A.L.-HCV Cohort                                                          | 1991 | 1992 | 2008      | -              | HCV infected     | Taiwan                  | 10-HCC/PLC/liver cancer                             | age, alanine aminotransferase (ALT), the ratio of aspartate aminotransferase to ALT, serum HCV RNA levels and cirrhosis status and HCV genotype |
|                                | Lee-2014             | V | External    | High risk validation cohort                                                      | 2004 | 2005 | 2008      | -              | HCV infected     | Taiwan                  | >10-HCC/PLC/liver cancer                            | age, alanine aminotransferase (ALT), the ratio of aspartate aminotransferase to ALT, serum HCV RNA levels and cirrhosis status and HCV genotype |
|                                | Lee-2014             | V | External    | High risk validation cohort                                                      | 2004 | 2005 | 2008      | -              | HCV infected     | Taiwan                  | 5-HCC/PLC/liver cancer                              | age, alanine aminotransferase (ALT), the ratio of aspartate aminotransferase to ALT, serum HCV RNA levels and cirrhosis status and HCV genotype |
| 10.1158/1940-6207.CAPR-15-0434 | Duarte-Salles 1-2016 | D | -           | EPIC cohort                                                                      | 1991 | 2000 | 2006      | 4.8 years      | general people   | Western European        | 5-HCC/PLC/liver cancer                              | OPN, AFP                                                                                                                                        |
|                                | Duarte-Salles 2-2016 | D | -           | EPIC cohort                                                                      | 1991 | 2000 | 2006      | 4.8 years      | general people   | Western European        | 5-HCC/PLC/liver cancer                              | OPN, GGT, ALP, and AST                                                                                                                          |
|                                | Duarte-Salles 3-2016 | D | -           | EPIC cohort                                                                      | 1991 | 2000 | 2006      | 4.8 years      | general people   | Western European        | 5-HCC/PLC/liver cancer                              | OPN, AFP, GGT, ALP, and AST                                                                                                                     |
|                                | Duarte-Salles 4-2016 | D | -           | EPIC cohort                                                                      | 1991 | 2000 | 2006      | 4.8 years      | general people   | Western European        | 5-HCC/PLC/liver cancer                              | GGT, ALP, and AST                                                                                                                               |
|                                | Duarte-Salles 1-2016 | V | Internal    | EPIC cohort                                                                      | 1991 | 2000 | 2006      | 4.8 years      | general people   | Western European        | 5-HCC/PLC/liver cancer                              | OPN, AFP                                                                                                                                        |
|                                | Duarte-Salles 2-2016 | V | Internal    | EPIC cohort                                                                      | 1991 | 2000 | 2006      | 4.8 years      | general people   | Western European        | 5-HCC/PLC/liver cancer                              | OPN, GGT, ALP, and AST                                                                                                                          |
|                                | Duarte-Salles 3-2016 | D | -           | EPIC cohort                                                                      | 1991 | 2000 | 2006      | 4.8 years      | general people   | Western European        | <5-HCC/PLC/liver cancer                             | OPN, AFP, GGT, ALP, and AST                                                                                                                     |
|                                | Duarte-Salles 4-2016 | D | -           | EPIC cohort                                                                      | 1991 | 2000 | 2006      | 4.8 years      | general people   | Western European        | <5-HCC/PLC/liver cancer                             | OPN, AFP                                                                                                                                        |
|                                | Duarte-Salles 1-2016 | D | -           | EPIC cohort                                                                      | 1991 | 2000 | 2006      | 4.8 years      | general people   | Western European        | <5-HCC/PLC/liver cancer                             | OPN, GGT, ALP, and AST                                                                                                                          |
|                                | Duarte-Salles 3-2016 | D | -           | EPIC cohort                                                                      | 1991 | 2000 | 2006      | 4.8 years      | general people   | Western European        | <5-HCC/PLC/liver cancer                             | OPN, AFP, GGT, ALP, and AST                                                                                                                     |
| Duarte-Salles 4-2016           | D                    | - | EPIC cohort | 1991                                                                             | 2000 | 2006 | 4.8 years | general people | Western European | <5-HCC/PLC/liver cancer | GGT, ALP, and AST                                   |                                                                                                                                                 |
| 10.1002/hep.27654              | FIB-4                | V | External    | Seoul National University Hospital                                               | 2003 | 2010 | 2010      | 5.4 years      | HBV infected     | Korea                   | 5-HCC/PLC/liver cancer                              | age, AST, ALT, and PLT                                                                                                                          |
|                                | US-FIB-4             | V | External    | Seoul National University Hospital                                               | 2003 | 2011 | 2011      | 5.4 years      | HBV infected     | Korea                   | 5-HCC/PLC/liver cancer                              | age, AST, ALT, PLT and US (ultrasound)                                                                                                          |
| 10.1136/gutjal-2018-316525     | AGED                 | D | -           | a community-based prospective cohort (qidong hepatitis B infection cohort (OBC)) | 1996 |      |           |                | general people   | China                   | 5-HCC/PLC/liver cancer                              | age, gender, ALT, HBVe antigen (HBeAg) and HBV DNA                                                                                              |
|                                | AGED                 | D | -           | a community-based prospective cohort (qidong hepatitis B infection cohort (OBC)) | 1996 |      |           |                | general people   | China                   | 10-HCC/PLC/liver cancer                             | age, gender, ALT, HBVe antigen (HBeAg) and HBV DNA                                                                                              |
|                                | AGED                 | D | -           | a community-based prospective cohort (qidong hepatitis B infection cohort (OBC)) | 1996 |      |           |                | general people   | China                   | >10-HCC/PLC/liver cancer                            | age, gender, ALT, HBVe antigen (HBeAg) and HBV DNA                                                                                              |
|                                | AGED                 | D | -           | a community-based prospective cohort (qidong hepatitis B infection cohort (OBC)) | 1996 |      |           |                | general people   | China                   | >10-HCC/PLC/liver cancer                            | age, gender, ALT, HBVe antigen (HBeAg) and HBV DNA                                                                                              |
|                                | AGED                 | V | External    | -                                                                                | 2007 |      |           |                | HBV infected     | China                   | 5-HCC/PLC/liver cancer                              | age, gender, ALT, HBVe antigen (HBeAg) and HBV DNA                                                                                              |
|                                | AGED                 | V | External    | -                                                                                | 2007 |      |           |                | HBV infected     | China                   | 10-HCC/PLC/liver cancer                             | age, gender, ALT, HBVe antigen (HBeAg) and HBV DNA                                                                                              |

|                              |                           |          |          |                                                                                                                       |      |      |      |              |                        |                        |                                                                                                                                    |                                                                                                                                                                                                                                                                                     |
|------------------------------|---------------------------|----------|----------|-----------------------------------------------------------------------------------------------------------------------|------|------|------|--------------|------------------------|------------------------|------------------------------------------------------------------------------------------------------------------------------------|-------------------------------------------------------------------------------------------------------------------------------------------------------------------------------------------------------------------------------------------------------------------------------------|
| 10.1371/journal.pone.0158066 | DM-HCC risk score         | D        | -        | Seoul National University Bundang Hospital (SNUBH), a tertiary referral center located at Seongnam, Republic of Korea | 2003 | -    | 2014 | -            | patients with diabetes | Korea                  | 5-HCC/PLC/liver cancer                                                                                                             | age, GGT, TG                                                                                                                                                                                                                                                                        |
|                              | DM-HCC risk score         | V        | Internal | Seoul National University Bundang Hospital (SNUBH), a tertiary referral center located at Seongnam, Republic of Korea | 2003 | -    | 2014 | -            | patients with diabetes | Korea                  | 5-HCC/PLC/liver cancer                                                                                                             | age, GGT, TG                                                                                                                                                                                                                                                                        |
| 10.1093/cid/cis224           | MELD                      | V        | External | ERCHIVES                                                                                                              | 2001 | -    | -    | -            | HCV infected           | U.S.                   | <5-SLD/advanced liver disease/cirrhosis/liver death                                                                                | bilirubin, INR, creatinine                                                                                                                                                                                                                                                          |
|                              | FIB-4                     | V        | External | ERCHIVES                                                                                                              | 2001 | -    | -    | -            | HCV infected           | U.S.                   | <5-SLD/advanced liver disease/cirrhosis/liver death                                                                                | age, AST, ALT, and PLT                                                                                                                                                                                                                                                              |
|                              | Child-Pugh;               | V        | External | ERCHIVES                                                                                                              | 2001 | -    | -    | -            | HCV infected           | U.S.                   | <5-HCC/PLC/liver cancer                                                                                                            | total bilirubin, serum albumin, international malized ratio (INR), and presence and severity of ascites and hepatic encephalopathy                                                                                                                                                  |
|                              | MELD                      | V        | External | ERCHIVES                                                                                                              | 2001 | -    | -    | -            | HCV infected           | U.S.                   | <5-HCC/PLC/liver cancer                                                                                                            | bilirubin, INR, creatinine                                                                                                                                                                                                                                                          |
|                              | FIB-4                     | V        | External | ERCHIVES                                                                                                              | 2001 | -    | -    | -            | HCV infected           | U.S.                   | <5-HCC/PLC/liver cancer                                                                                                            | age, AST, ALT, and PLT                                                                                                                                                                                                                                                              |
|                              | MELD                      | V        | External | ERCHIVES                                                                                                              | 2001 | -    | -    | -            | HCV infected           | U.S.                   | <5-SLD/advanced liver disease/cirrhosis/liver death                                                                                | bilirubin, INR, creatinine                                                                                                                                                                                                                                                          |
|                              | FIB-4                     | V        | External | ERCHIVES                                                                                                              | 2001 | -    | -    | -            | HCV infected           | U.S.                   | <5-SLD/advanced liver disease/cirrhosis/liver death                                                                                | age, AST, ALT, and PLT                                                                                                                                                                                                                                                              |
|                              | Child-Pugh;               | V        | External | ERCHIVES                                                                                                              | 2001 | -    | -    | -            | HCV infected           | U.S.                   | <5-HCC/PLC/liver cancer                                                                                                            | total bilirubin, serum albumin, international malized ratio (INR), and presence and severity of ascites and hepatic encephalopathy                                                                                                                                                  |
|                              | MELD                      | V        | External | ERCHIVES                                                                                                              | 2001 | -    | -    | -            | HCV infected           | U.S.                   | <5-HCC/PLC/liver cancer                                                                                                            | bilirubin, INR, creatinine                                                                                                                                                                                                                                                          |
|                              | FIB-4                     | V        | External | ERCHIVES                                                                                                              | 2001 | -    | -    | -            | HCV infected           | U.S.                   | <5-HCC/PLC/liver cancer                                                                                                            | age, AST, ALT, and PLT                                                                                                                                                                                                                                                              |
|                              | MELD                      | V        | External | ERCHIVES                                                                                                              | 2001 | -    | -    | -            | HCV infected           | U.S.                   | 5-SLD/advanced liver disease/cirrhosis/liver death                                                                                 | bilirubin, INR, creatinine                                                                                                                                                                                                                                                          |
|                              | FIB-4                     | V        | External | ERCHIVES                                                                                                              | 2001 | -    | -    | -            | HCV infected           | U.S.                   | 5-SLD/advanced liver disease/cirrhosis/liver death                                                                                 | age, AST, ALT, and PLT                                                                                                                                                                                                                                                              |
| Child-Pugh;                  | V                         | External | ERCHIVES | 2001                                                                                                                  | -    | -    | -    | HCV infected | U.S.                   | 5-HCC/PLC/liver cancer | total bilirubin, serum albumin, international malized ratio (INR), and presence and severity of ascites and hepatic encephalopathy |                                                                                                                                                                                                                                                                                     |
| MELD                         | V                         | External | ERCHIVES | 2001                                                                                                                  | -    | -    | -    | HCV infected | U.S.                   | 5-HCC/PLC/liver cancer | bilirubin, INR, creatinine                                                                                                         |                                                                                                                                                                                                                                                                                     |
| FIB-4                        | V                         | External | ERCHIVES | 2001                                                                                                                  | -    | -    | -    | HCV infected | U.S.                   | 5-HCC/PLC/liver cancer | age, AST, ALT, and PLT                                                                                                             |                                                                                                                                                                                                                                                                                     |
| 10.1002/mc.22505             | Methylation Profile Score | D        | -        | GECC, CGMH                                                                                                            | 1988 | 1992 | -    | -            | HBV infected           | Taiwan                 | >10-HCC/PLC/liver cancer                                                                                                           | three probes cg00300879, cg06872964, and cg07080864 related methylated sites (in the CNKSR1, IFI44L, and PENK gene)                                                                                                                                                                 |
|                              | Methylation Profile Score | D        | -        | GECC, CGMH                                                                                                            | 1988 | 1992 | -    | -            | HBV infected           | Taiwan                 | >10-HCC/PLC/liver cancer                                                                                                           | three probes cg00300879, cg06872964, and cg07080864 related methylated sites (in the CNKSR1, IFI44L, and PENK gene)                                                                                                                                                                 |
|                              | Methylation Profile Score | D        | -        | multicenter study                                                                                                     | 1998 | 2009 | -    | -            | HBV infected           | Taiwan                 | >10-HCC/PLC/liver cancer                                                                                                           | three probes cg00300879, cg06872964, and cg07080864 related methylated sites (in the CNKSR1, IFI44L, and PENK gene)                                                                                                                                                                 |
| 10.1371/journal.pone.0187344 | Konerman-2017             | V        | External | UMHS cohort                                                                                                           | 1998 | 2014 | 2014 | -            | HCV infected           | U.S.                   | <5-SLD/advanced liver disease/cirrhosis/liver death                                                                                | APRI, Mean Baseline Platelets, Mean Platelets, Max Platelets, Mean Albumin, Max APRI, Mean Alk Phos, Mean MELD, Diff Mean Albumin, Mean INR, Diff Mean Bilirubin, Mean AFP, Diff Mean INR, Max MELD Baseline APRI Diff Mean MELD, Max AFP, Diff Mean AFP, Baseline AFP, Max Albumin |
|                              | Konerman-2017             | V        | External | UMHS cohort                                                                                                           | 1998 | 2014 | 2014 | -            | HCV infected           | U.S.                   | <5-SLD/advanced liver disease/cirrhosis/liver death                                                                                | APRI, Mean Baseline Platelets, Mean Platelets, Max Platelets, Mean Albumin, Max APRI, Mean Alk Phos, Mean MELD, Diff Mean Albumin, Mean INR, Diff Mean Bilirubin, Mean AFP, Diff Mean INR, Max MELD Baseline APRI Diff Mean MELD, Max AFP, Diff Mean AFP, Baseline AFP, Max Albumin |
|                              | Konerman-2017             | V        | External | UMHS cohort                                                                                                           | 1998 | 2014 | 2014 | -            | HCV infected           | U.S.                   | <5-HCC/PLC/liver cancer                                                                                                            | APRI, Mean Baseline Platelets, Mean Platelets, Max Platelets, Mean Albumin, Max APRI, Mean Alk Phos, Mean MELD, Diff Mean Albumin, Mean INR, Diff Mean Bilirubin, Mean AFP, Diff Mean INR, Max MELD Baseline APRI Diff Mean MELD, Max AFP, Diff Mean AFP, Baseline AFP, Max Albumin |
|                              | Konerman-2017             | V        | External | UMHS cohort                                                                                                           | 1998 | 2014 | 2014 | -            | HCV infected           | U.S.                   | <5-HCC/PLC/liver cancer                                                                                                            | APRI, Mean Baseline Platelets, Mean Platelets, Max Platelets, Mean Albumin, Max APRI, Mean Alk Phos, Mean MELD, Diff Mean Albumin, Mean INR, Diff Mean Bilirubin, Mean AFP, Diff Mean INR, Max MELD Baseline APRI Diff Mean MELD, Max AFP, Diff Mean AFP, Baseline AFP, Max Albumin |
|                              | mREACH-B                  | V        | External | Chronic Hepatitis B patients who underwent transient elastography at tertiary centres                                 | 2006 | 2012 | -    | -            | HBV infected           | South Korea            | <5-SLD/advanced liver disease/cirrhosis/liver death                                                                                | age, gender, Alanine aminotransferase, HBeAg, Liver stiffness                                                                                                                                                                                                                       |
|                              | PAGE-B                    | V        | External | Chronic Hepatitis B patients who underwent transient elastography at tertiary centres                                 | 2006 | 2012 | -    | -            | HBV infected           | South Korea            | <5-SLD/advanced liver disease/cirrhosis/liver death                                                                                | age, gender, Platelet count                                                                                                                                                                                                                                                         |

10.18632/oncotarget.22375

|          |   |          |                                                                                       |      |      |   |   |              |             |                                                       |                                                               |
|----------|---|----------|---------------------------------------------------------------------------------------|------|------|---|---|--------------|-------------|-------------------------------------------------------|---------------------------------------------------------------|
| LSM-HCC  | V | External | Chronic Hepatitis B patients who underwent transient elastography at tertiary centres | 2006 | 2012 | - | - | HBV infected | South Korea | <5-SLD/advanced liver disease/cirrhosis/liver death   | LS values, age, serum albumin level, and HBV DNA level        |
| mREACH-B | V | External | Chronic Hepatitis B patients who underwent transient elastography at tertiary centres | 2006 | 2012 | - | - | HBV infected | South Korea | 5-SLD/advanced liver disease/cirrhosis/liver death    | age, gender, Alanine aminotransferase, HBeAg, Liver stiffness |
| PAGE-B   | V | External | Chronic Hepatitis B patients who underwent transient elastography at tertiary centres | 2006 | 2012 | - | - | HBV infected | South Korea | 5-SLD/advanced liver disease/cirrhosis/liver death    | age, gender, Platelet count                                   |
| LSM-HCC  | V | External | Chronic Hepatitis B patients who underwent transient elastography at tertiary centres | 2006 | 2012 | - | - | HBV infected | South Korea | 5-SLD/advanced liver disease/cirrhosis/liver death    | LS values, age, serum albumin level, and HBV DNA level        |
| mREACH-B | V | External | Chronic Hepatitis B patients who underwent transient elastography at tertiary centres | 2006 | 2012 | - | - | HBV infected | South Korea | 5-10-SLD/advanced liver disease/cirrhosis/liver death | age, gender, Alanine aminotransferase, HBeAg, Liver stiffness |
| PAGE-B   | V | External | Chronic Hepatitis B patients who underwent transient elastography at tertiary centres | 2006 | 2012 | - | - | HBV infected | South Korea | 5-10-SLD/advanced liver disease/cirrhosis/liver death | age, gender, Platelet count                                   |
| LSM-HCC  | V | External | Chronic Hepatitis B patients who underwent transient elastography at tertiary centres | 2006 | 2012 | - | - | HBV infected | South Korea | 5-10-SLD/advanced liver disease/cirrhosis/liver death | LS values, age, serum albumin level, and HBV DNA level        |
| mREACH-B | V | External | Chronic Hepatitis B patients who underwent transient elastography at tertiary centres | 2006 | 2012 | - | - | HBV infected | South Korea | <5-HCC/PLC/liver cancer                               | age, gender, Alanine aminotransferase, HBeAg, Liver stiffness |
| PAGE-B   | V | External | Chronic Hepatitis B patients who underwent transient elastography at tertiary centres | 2006 | 2012 | - | - | HBV infected | South Korea | <5-HCC/PLC/liver cancer                               | age, gender, Platelet count                                   |
| LSM-HCC  | V | External | Chronic Hepatitis B patients who underwent transient elastography at tertiary centres | 2006 | 2012 | - | - | HBV infected | South Korea | <5-HCC/PLC/liver cancer                               | LS values, age, serum albumin level, and HBV DNA level        |
| mREACH-B | V | External | Chronic Hepatitis B patients who underwent transient elastography at tertiary centres | 2006 | 2012 | - | - | HBV infected | South Korea | 5-HCC/PLC/liver cancer                                | age, gender, Alanine aminotransferase, HBeAg, Liver stiffness |
| PAGE-B   | V | External | Chronic Hepatitis B patients who underwent transient elastography at tertiary centres | 2006 | 2012 | - | - | HBV infected | South Korea | 5-HCC/PLC/liver cancer                                | age, gender, Platelet count                                   |

|                           |             |          |              |                                                                                       |      |      |      |              |                        |                         |                                                                                                                                |                                                                                                                                                                                                                 |
|---------------------------|-------------|----------|--------------|---------------------------------------------------------------------------------------|------|------|------|--------------|------------------------|-------------------------|--------------------------------------------------------------------------------------------------------------------------------|-----------------------------------------------------------------------------------------------------------------------------------------------------------------------------------------------------------------|
|                           | LSM-HCC     | V        | External     | Chronic Hepatitis B patients who underwent transient elastography at tertiary centres | 2006 | 2012 | -    | -            | HBV infected           | South Korea             | 5-HCC/PLC/liver cancer                                                                                                         | LS values, age, serum albumin level, and HBV DNA level                                                                                                                                                          |
|                           | mREACH-B    | V        | External     | Chronic Hepatitis B patients who underwent transient elastography at tertiary centres | 2006 | 2012 | -    | -            | HBV infected           | South Korea             | 5-10-HCC/PLC/liver cancer                                                                                                      | age, gender, Alanine aminotransferase, HBeAg, Liver stiffness                                                                                                                                                   |
|                           | PAGE-B      | V        | External     | Chronic Hepatitis B patients who underwent transient elastography at tertiary centres | 2006 | 2012 | -    | -            | HBV infected           | South Korea             | 5-10-HCC/PLC/liver cancer                                                                                                      | age, gender, Platelet count                                                                                                                                                                                     |
|                           | LSM-HCC     | V        | External     | Chronic Hepatitis B patients who underwent transient elastography at tertiary centres | 2006 | 2012 | -    | -            | HBV infected           | South Korea             | 5-10-HCC/PLC/liver cancer                                                                                                      | LS values, age, serum albumin level, and HBV DNA level                                                                                                                                                          |
| 10.1016/j.egh.2015.10.033 | REACH-B IIa | D        | -            | (REVEAL)-HBV cohort                                                                   | 1991 | 1992 | 2008 | -            | HBV infected           | Taiwan                  | <5-HCC/PLC/liver cancer                                                                                                        | sex, age (in 5-year increments), serum ALT level, a combined variable for HBeAg serostatus, and serum HBV DNA and HBSAg levels                                                                                  |
|                           | REACH-B IIb | D        | -            | (REVEAL)-HBV cohort                                                                   | 1991 | 1992 | 2008 | -            | HBV infected           | Taiwan                  | <5-HCC/PLC/liver cancer                                                                                                        | sex, age, serum ALT levels, and combined variables of HBeAg and serum HBSAg levels                                                                                                                              |
|                           | REACH-B     | V        | External     | (ERADICATE-B) study                                                                   | 1985 | 2000 | 2010 | -            | HBV infected           | Taiwan                  | <5-HCC/PLC/liver cancer                                                                                                        | Gender, age, ALT, HBeAg status, hepatitis B virus(HBV)DNA load(copies/mL)                                                                                                                                       |
|                           | REACH-B IIa | V        | External     | (ERADICATE-B) study                                                                   | 1985 | 2000 | 2010 | -            | HBV infected           | Taiwan                  | <5-HCC/PLC/liver cancer                                                                                                        | sex, age (in 5-year increments), serum ALT level, a combined variable for HBeAg serostatus, and serum HBV DNA and HBSAg levels                                                                                  |
|                           | REACH-B IIb | V        | External     | (ERADICATE-B) study                                                                   | 1985 | 2000 | 2010 | -            | HBV infected           | Taiwan                  | <5-HCC/PLC/liver cancer                                                                                                        | sex, age, serum ALT levels, and combined variables of HBeAg and serum HBSAg levels                                                                                                                              |
|                           | REACH-B     | V        | External     | (ERADICATE-B) study                                                                   | 1985 | 2000 | 2010 | -            | HBV infected           | Taiwan                  | 5-HCC/PLC/liver cancer                                                                                                         | Gender, age, ALT, HBeAg status, hepatitis B virus(HBV)DNA load(copies/mL)                                                                                                                                       |
|                           | REACH-B IIa | V        | External     | (ERADICATE-B) study                                                                   | 1985 | 2000 | 2010 | -            | HBV infected           | Taiwan                  | 5-HCC/PLC/liver cancer                                                                                                         | sex, age (in 5-year increments), serum ALT level, a combined variable for HBeAg serostatus, and serum HBV DNA and HBSAg levels                                                                                  |
|                           | REACH-B IIb | V        | External     | (ERADICATE-B) study                                                                   | 1985 | 2000 | 2010 | -            | HBV infected           | Taiwan                  | 5-HCC/PLC/liver cancer                                                                                                         | sex, age, serum ALT levels, and combined variables of HBeAg and serum HBSAg levels                                                                                                                              |
|                           | REACH-B     | V        | External     | (ERADICATE-B) study                                                                   | 1985 | 2000 | 2010 | -            | HBV infected           | Taiwan                  | 10-HCC/PLC/liver cancer                                                                                                        | Gender, age, ALT, HBeAg status, hepatitis B virus(HBV)DNA load(copies/mL)                                                                                                                                       |
|                           | REACH-B IIa | V        | External     | (ERADICATE-B) study                                                                   | 1985 | 2000 | 2010 | -            | HBV infected           | Taiwan                  | 10-HCC/PLC/liver cancer                                                                                                        | sex, age (in 5-year increments), serum ALT level, a combined variable for HBeAg serostatus, and serum HBV DNA and HBSAg levels                                                                                  |
|                           | REACH-B IIb | V        | External     | (ERADICATE-B) study                                                                   | 1985 | 2000 | 2010 | -            | HBV infected           | Taiwan                  | 10-HCC/PLC/liver cancer                                                                                                        | sex, age, serum ALT levels, and combined variables of HBeAg and serum HBSAg levels                                                                                                                              |
|                           | REACH-B     | V        | External     | (CUHK) study                                                                          | 1997 | 2000 | 2008 | -            | HBV infected           | Hong Kong               | <5-HCC/PLC/liver cancer                                                                                                        | Gender, age, ALT, HBeAg status, hepatitis B virus(HBV)DNA load(copies/mL)                                                                                                                                       |
|                           | REACH-B IIa | V        | External     | (CUHK) study                                                                          | 1997 | 2000 | 2008 | -            | HBV infected           | Hong Kong               | <5-HCC/PLC/liver cancer                                                                                                        | sex, age (in 5-year increments), serum ALT level, a combined variable for HBeAg serostatus, and serum HBV DNA and HBSAg levels                                                                                  |
|                           | REACH-B IIb | V        | External     | (CUHK) study                                                                          | 1997 | 2000 | 2008 | -            | HBV infected           | Hong Kong               | <5-HCC/PLC/liver cancer                                                                                                        | sex, age, serum ALT levels, and combined variables of HBeAg and serum HBSAg levels                                                                                                                              |
|                           | REACH-B     | V        | External     | (CUHK) study                                                                          | 1997 | 2000 | 2008 | -            | HBV infected           | Hong Kong               | 5-HCC/PLC/liver cancer                                                                                                         | Gender, age, ALT, HBeAg status, hepatitis B virus(HBV)DNA load(copies/mL)                                                                                                                                       |
|                           | REACH-B IIa | V        | External     | (CUHK) study                                                                          | 1997 | 2000 | 2008 | -            | HBV infected           | Hong Kong               | 5-HCC/PLC/liver cancer                                                                                                         | sex, age (in 5-year increments), serum ALT level, a combined variable for HBeAg serostatus, and serum HBV DNA and HBSAg levels                                                                                  |
|                           | REACH-B IIb | V        | External     | (CUHK) study                                                                          | 1997 | 2000 | 2008 | -            | HBV infected           | Hong Kong               | 5-HCC/PLC/liver cancer                                                                                                         | sex, age, serum ALT levels, and combined variables of HBeAg and serum HBSAg levels                                                                                                                              |
|                           | REACH-B     | V        | External     | (CUHK) study                                                                          | 1997 | 2000 | 2008 | -            | HBV infected           | Hong Kong               | 10-HCC/PLC/liver cancer                                                                                                        | Gender, age, ALT, HBeAg status, hepatitis B virus(HBV)DNA load(copies/mL)                                                                                                                                       |
|                           | REACH-B IIa | V        | External     | (CUHK) study                                                                          | 1997 | 2000 | 2008 | -            | HBV infected           | Hong Kong               | 10-HCC/PLC/liver cancer                                                                                                        | sex, age (in 5-year increments), serum ALT level, a combined variable for HBeAg serostatus, and serum HBV DNA and HBSAg levels                                                                                  |
|                           | REACH-B IIb | V        | External     | (CUHK) study                                                                          | 1997 | 2000 | 2008 | -            | HBV infected           | Hong Kong               | 10-HCC/PLC/liver cancer                                                                                                        | sex, age, serum ALT levels, and combined variables of HBeAg and serum HBSAg levels                                                                                                                              |
| REACH-B                   | V           | External | (CUHK) study | 1997                                                                                  | 2000 | 2008 | -    | HBV infected | Hong Kong              | 5-HCC/PLC/liver cancer  | Gender, age, ALT, HBeAg status, hepatitis B virus(HBV)DNA load(copies/mL)                                                      |                                                                                                                                                                                                                 |
| REACH-B IIa               | V           | External | (CUHK) study | 1997                                                                                  | 2000 | 2008 | -    | HBV infected | Hong Kong              | 5-HCC/PLC/liver cancer  | sex, age (in 5-year increments), serum ALT level, a combined variable for HBeAg serostatus, and serum HBV DNA and HBSAg levels |                                                                                                                                                                                                                 |
| REACH-B IIb               | V           | External | (CUHK) study | 1997                                                                                  | 2000 | 2008 | -    | HBV infected | Hong Kong              | 5-HCC/PLC/liver cancer  | sex, age, serum ALT levels, and combined variables of HBeAg and serum HBSAg levels                                             |                                                                                                                                                                                                                 |
| REACH-B                   | V           | External | (CUHK) study | 1997                                                                                  | 2000 | 2008 | -    | HBV infected | Hong Kong              | 10-HCC/PLC/liver cancer | Gender, age, ALT, HBeAg status, hepatitis B virus(HBV)DNA load(copies/mL)                                                      |                                                                                                                                                                                                                 |
| REACH-B IIa               | V           | External | (CUHK) study | 1997                                                                                  | 2000 | 2008 | -    | HBV infected | Hong Kong              | 10-HCC/PLC/liver cancer | sex, age (in 5-year increments), serum ALT level, a combined variable for HBeAg serostatus, and serum HBV DNA and HBSAg levels |                                                                                                                                                                                                                 |
| REACH-B IIb               | V           | External | (CUHK) study | 1997                                                                                  | 2000 | 2008 | -    | HBV infected | Hong Kong              | 10-HCC/PLC/liver cancer | sex, age, serum ALT levels, and combined variables of HBeAg and serum HBSAg levels                                             |                                                                                                                                                                                                                 |
| Li-2018                   | D           | -        | -            | Patients with type 2 diabetes                                                         | 2001 | 2004 | 2011 | 8.33 years   | patients with diabetes | Taiwan                  | <5-HCC/PLC/liver cancer                                                                                                        | Age, gender, smoking, SGPT (u/l) Hbs1C, comorbidity (liver cirrhosis, hepatitis B, hepatitis C), antidiabetes medication, antihyperlipidemia medication (total/high density lipoprotein cholesterol ratio)      |
| Li-2018                   | D           | -        | -            | Patients with type 2 diabetes                                                         | 2001 | 2004 | 2011 | 8.33 years   | patients with diabetes | Taiwan                  | 5-HCC/PLC/liver cancer                                                                                                         | Age, gender, smoking, SGPT (u/l) Hbs1C, ALT, comorbidity (liver cirrhosis, hepatitis B, hepatitis C), antidiabetes medication, antihyperlipidemia medication (total/high density lipoprotein cholesterol ratio) |

|                                 |             |   |          |                                                                                                                                                                                                                                                                                                  |      |      |      |            |                        |             |                         |                                                                                                                                                                                                                 |
|---------------------------------|-------------|---|----------|--------------------------------------------------------------------------------------------------------------------------------------------------------------------------------------------------------------------------------------------------------------------------------------------------|------|------|------|------------|------------------------|-------------|-------------------------|-----------------------------------------------------------------------------------------------------------------------------------------------------------------------------------------------------------------|
| 10.1053/j.seminocol.2018.07.006 | Li-2018     | D | -        | Patients with type 2 diabetes                                                                                                                                                                                                                                                                    | 2001 | 2004 | 2011 | 8.33 years | patients with diabetes | Taiwan      | 10-HCC/PLC/liver cancer | Age, gender, smoking, SGPT (u/l) Hba1C, ALT, comorbidity (liver cirrhosis, hepatitis B, hepatitis C), antidiabetes medication, antihyperlipidemia medication (total/high density lipoprotein cholesterol ratio) |
|                                 | Li-2018     | V | Internal | Patients with type 2 diabetes                                                                                                                                                                                                                                                                    | 2001 | 2004 | 2011 | 8.33 years | patients with diabetes | Taiwan      | <5-HCC/PLC/liver cancer | Age, gender, smoking, SGPT (u/l) Hba1C, ALT, comorbidity (liver cirrhosis, hepatitis B, hepatitis C), antidiabetes medication, antihyperlipidemia medication (total/high density lipoprotein cholesterol ratio) |
|                                 | Li-2018     | V | Internal | Patients with type 2 diabetes                                                                                                                                                                                                                                                                    | 2001 | 2004 | 2011 | 8.33 years | patients with diabetes | Taiwan      | 5-HCC/PLC/liver cancer  | Age, gender, smoking, SGPT (u/l) Hba1C, ALT, comorbidity (liver cirrhosis, hepatitis B, hepatitis C), antidiabetes medication, antihyperlipidemia medication (total/high density lipoprotein cholesterol ratio) |
|                                 | Li-2018     | V | Internal | Patients with type 2 diabetes                                                                                                                                                                                                                                                                    | 2001 | 2004 | 2011 | 8.33 years | patients with diabetes | Taiwan      | 10-HCC/PLC/liver cancer | Age, gender, smoking, SGPT (u/l) Hba1C, ALT, comorbidity (liver cirrhosis, hepatitis B, hepatitis C), antidiabetes medication, antihyperlipidemia medication (total/high density lipoprotein cholesterol ratio) |
| 10.3350/cmh.2020.0333           | Liang score | D | -        | Consesutive adult Chronic Hep B pt (CDARS data from Hospital Authority (Hong Kong))                                                                                                                                                                                                              | 2000 | 2018 | -    | 52 months  | HBV infected           | Hong Kong   | 5-HCC/PLC/liver cancer  | age, gender, HBV DNA, FIB-4                                                                                                                                                                                     |
|                                 | Liang score | V | External | Treatment naive Korean Chronic Hep B cohort                                                                                                                                                                                                                                                      | 2000 | 2017 | -    | 50 months  | HBV infected           | South Korea | 5-HCC/PLC/liver cancer  | age, gender, HBV DNA, FIB-4                                                                                                                                                                                     |
|                                 | GAG-HCC     | V | External | Treatment naive Korean Chronic Hep B cohort                                                                                                                                                                                                                                                      | 2000 | 2017 | -    | 50 months  | HBV infected           | South Korea | 5-HCC/PLC/liver cancer  | Age, gender, core promoter mutaiton, level of HBV DNA, cirrhosis                                                                                                                                                |
|                                 | REACH-B     | V | External | Treatment naive Korean Chronic Hep B cohort                                                                                                                                                                                                                                                      | 2000 | 2017 | -    | 50 months  | HBV infected           | South Korea | 5-HCC/PLC/liver cancer  | Age, gender, ALT, HBeAg, HBV DNA                                                                                                                                                                                |
|                                 | CU-HCC      | V | External | Treatment naive Korean Chronic Hep B cohort                                                                                                                                                                                                                                                      | 2000 | 2017 | -    | 50 months  | HBV infected           | South Korea | 5-HCC/PLC/liver cancer  | -                                                                                                                                                                                                               |
| 10.1093/ije/dyaa089             | Sinn-2020   | D | -        | National Health Insurance Service (NHIS)-National Sample Cohort (NSC) (representative sample of 2.2% of Korean citizens enroled in NHIS) - all men and women 20 years of age participating in the NHIS-NSC cohort with at least one health screening between 1 January 2003 and 31 December 2013 | 2003 | 2013 | -    | -          | general people         | South Korea | 10-HCC/PLC/liver cancer | Age, gender, smoking, diabetes, ALT, total cholesterol                                                                                                                                                          |
|                                 | Sinn-2020   | V | External | Samsung Medical Center Health Promotion Center Cohort (SMC-HPCC) - men and women 20 years of age who underwent comprehensive health check-up examinations between January 2003 and December 2013, and additional follow-up between January 2003 and November 2017 at Samsung Medical Center,     | 2003 | 2013 | 2017 | -          | general people         | South Korea | 10-HCC/PLC/liver cancer | Age, gender, smoking, diabetes, ALT, total cholesterol                                                                                                                                                          |



|                      |                      |          |                                                          |                                                                                                                                                                                                                                                                                                                                                                                                                                                               |      |      |   |                     |                     |                                                     |                                                                                 |                                                                                 |
|----------------------|----------------------|----------|----------------------------------------------------------|---------------------------------------------------------------------------------------------------------------------------------------------------------------------------------------------------------------------------------------------------------------------------------------------------------------------------------------------------------------------------------------------------------------------------------------------------------------|------|------|---|---------------------|---------------------|-----------------------------------------------------|---------------------------------------------------------------------------------|---------------------------------------------------------------------------------|
| 10.1111/jvh.13185    | Sinn-2019            | D        | -                                                        | Across four academic institutions in South Korea: patients who met all of the following inclusion criteria: (a) adults aged 18 years or older, (b) patients with chronic hepatitis B, defined by presence of hepatitis B surface antigen (HBsAg) for more than 6 months or compatible history, (c) HBV treatment-naïve, (d) no co-infection with hepatitis C virus or human immunodeficiency virus and (e) no history of malignancy including HCC at baseline | 2006 | 2011 | - | -                   | HBV infected        | South Korea                                         | 5-HCC/PLC/liver cancer                                                          | Age, gender, HBeAg, ALT level, platelet count, cirrhosis                        |
| 10.1002/hep4.1700    | dAAR score           | D        | -                                                        | FINRISK                                                                                                                                                                                                                                                                                                                                                                                                                                                       | 2002 | 2012 | - | -                   | general people      | Finland                                             | 5-10-SLD/advanced liver disease/cirrhosis/liver death                           | age, AAR( aspartate-to-alanine aminotransferase ratio), and ALT                 |
|                      | dAAR score           | V        | External                                                 | Swedish Apolipoprotein Mortality Risk [AMORIS] subcohort                                                                                                                                                                                                                                                                                                                                                                                                      | 1985 | 1996 | - | -                   | general people      | Sweden                                              | 5-SLD/advanced liver disease/cirrhosis/liver death                              | age, AAR, and ALT                                                               |
|                      | dAAR score           | V        | External                                                 | Swedish Apolipoprotein Mortality Risk [AMORIS] subcohort                                                                                                                                                                                                                                                                                                                                                                                                      | 1985 | 1996 | - | -                   | general people      | Sweden                                              | 10-SLD/advanced liver disease/cirrhosis/liver death                             | age, AAR, and ALT                                                               |
|                      | dAAR score           | V        | External                                                 | Swedish Apolipoprotein Mortality Risk [AMORIS] subcohort                                                                                                                                                                                                                                                                                                                                                                                                      | 1985 | 1996 | - | -                   | general people      | Sweden                                              | >10-SLD/advanced liver disease/cirrhosis/liver death                            | age, AAR, and ALT                                                               |
|                      | FIB-4                | V        | External                                                 | Swedish Apolipoprotein Mortality Risk [AMORIS] subcohort                                                                                                                                                                                                                                                                                                                                                                                                      | 1985 | 1996 | - | -                   | general people      | Sweden                                              | 10-SLD/advanced liver disease/cirrhosis/liver death                             | age, AST, ALT, and PLT                                                          |
|                      | APRI                 | V        | External                                                 | Swedish Apolipoprotein Mortality Risk [AMORIS] subcohort                                                                                                                                                                                                                                                                                                                                                                                                      | 1985 | 1996 | - | -                   | general people      | Sweden                                              | 10-SLD/advanced liver disease/cirrhosis/liver death                             | AST, platelet count                                                             |
|                      | NAFLD Fibrosis Score | V        | External                                                 | Swedish Apolipoprotein Mortality Risk [AMORIS] subcohort                                                                                                                                                                                                                                                                                                                                                                                                      | 1985 | 1996 | - | -                   | general people      | Sweden                                              | 10-SLD/advanced liver disease/cirrhosis/liver death                             | age (years) ; BMI (kg/m2) ; diabetes ; AST/ALT ; platelet count ,albumin (g/dL) |
|                      | dAAR score           | V        | External                                                 | Swedish Apolipoprotein Mortality Risk [AMORIS] subcohort                                                                                                                                                                                                                                                                                                                                                                                                      | 1985 | 2009 | - | -                   | patients with NAFLD | Sweden                                              | 5-SLD/advanced liver disease/cirrhosis/liver death                              | age, AAR, and ALT                                                               |
|                      | dAAR score           | V        | External                                                 | Swedish Apolipoprotein Mortality Risk [AMORIS] subcohort                                                                                                                                                                                                                                                                                                                                                                                                      | 1985 | 2009 | - | -                   | patients with NAFLD | Sweden                                              | 10-SLD/advanced liver disease/cirrhosis/liver death                             | age, AAR, and ALT                                                               |
|                      | dAAR score           | V        | External                                                 | Swedish Apolipoprotein Mortality Risk [AMORIS] subcohort                                                                                                                                                                                                                                                                                                                                                                                                      | 1985 | 2009 | - | -                   | patients with NAFLD | Sweden                                              | >10-SLD/advanced liver disease/cirrhosis/liver death                            | age, AAR, and ALT                                                               |
|                      | FIB-4                | V        | External                                                 | Swedish Apolipoprotein Mortality Risk [AMORIS] subcohort                                                                                                                                                                                                                                                                                                                                                                                                      | 1985 | 2009 | - | -                   | patients with NAFLD | Sweden                                              | 10-SLD/advanced liver disease/cirrhosis/liver death                             | age, AST, ALT, and PLT                                                          |
|                      | APRI                 | V        | External                                                 | Swedish Apolipoprotein Mortality Risk [AMORIS] subcohort                                                                                                                                                                                                                                                                                                                                                                                                      | 1985 | 2009 | - | -                   | patients with NAFLD | Sweden                                              | 10-SLD/advanced liver disease/cirrhosis/liver death                             | AST, platelet count                                                             |
| NAFLD Fibrosis Score | V                    | External | Swedish Apolipoprotein Mortality Risk [AMORIS] subcohort | 1985                                                                                                                                                                                                                                                                                                                                                                                                                                                          | 2009 | -    | - | patients with NAFLD | Sweden              | 10-SLD/advanced liver disease/cirrhosis/liver death | age (years) ; BMI (kg/m2) ; diabetes ; AST/ALT ; platelet count ,albumin (g/dL) |                                                                                 |

|                                      |                      |   |          |                                                                                                                  |      |      |      |         |                     |             |                                                      |                                                                                                                                                                               |
|--------------------------------------|----------------------|---|----------|------------------------------------------------------------------------------------------------------------------|------|------|------|---------|---------------------|-------------|------------------------------------------------------|-------------------------------------------------------------------------------------------------------------------------------------------------------------------------------|
|                                      | dAAR score           | V | External | patients with biopsy-proven NAFLD at Karolinska University Hospital, Huddinge, and Linköping University Hospital | 1985 | 2009 | -    | -       | patients with NAFLD | Sweden      | >10-SLD/advanced liver disease/cirrhosis/liver death | age, AAR, and ALT                                                                                                                                                             |
| 10.21147/J.ISSN.1000-9604.2021.03.07 | MALE-ABCD            | D | -        | CCOP-LC Cohort                                                                                                   | 2017 | -    | 2019 | 2 years | HBV infected        | China       | <5-HCC/PLC/liver cancer                              | Age, AFP, DCP, GGT, PLT and WBC                                                                                                                                               |
|                                      | MALE-ABCD            | V | Internal | CCOP-LC Cohort                                                                                                   | 2017 | -    | 2019 | 2 years | HBV infected        | China       | <5-HCC/PLC/liver cancer                              | Age, AFP, DCP, GGT, PLT and WBC                                                                                                                                               |
|                                      | AGED                 | V | External | CCOP-LC Cohort                                                                                                   | 2017 | -    | 2019 | 2 years | HBV infected        | China       | <5-HCC/PLC/liver cancer                              | sex, age, HBeAg, HBV DNA(log copies/mL)                                                                                                                                       |
|                                      | REACH-B              | V | External | CCOP-LC Cohort                                                                                                   | 2017 | -    | 2019 | 2 years | HBV infected        | China       | <5-HCC/PLC/liver cancer                              | sex, age, ALT, HBeAg status and HBV DNA                                                                                                                                       |
|                                      | PAGE-B               | V | External | CCOP-LC Cohort                                                                                                   | 2017 | -    | 2019 | 2 years | HBV infected        | China       | <5-HCC/PLC/liver cancer                              | age, sex and platelets                                                                                                                                                        |
|                                      | mPAGE-B              | V | External | CCOP-LC Cohort                                                                                                   | 2017 | -    | 2019 | 2 years | HBV infected        | China       | <5-HCC/PLC/liver cancer                              | platelet, age, sex, albumin                                                                                                                                                   |
|                                      | THRI                 | V | External | CCOP-LC Cohort                                                                                                   | 2017 | -    | 2019 | 2 years | HBV infected        | China       | <5-HCC/PLC/liver cancer                              | Age, Etiology, Gender, Platelets                                                                                                                                              |
|                                      | GALAD                | V | External | CCOP-LC Cohort                                                                                                   | 2017 | -    | 2019 | 2 years | HBV infected        | China       | <5-HCC/PLC/liver cancer                              | age, sex, AFP, AFP-L3 (an isoform of AFP characterized by the presence of an a 1-6-linked residue on the AFP carbohydrate side chain), DCP                                    |
| 10.1136/gutjnl-2016-312993           | RWS-HCC              | V | External | non-Asian: Gastroenterology and Hepatology, University Hospital of Cologne, Germany                              | 1994 | 2015 | -    | -       | HBV infected        | Germany     | 10-HCC/PLC/liver cancer                              | age, gender, cirrhosis, serum AFP                                                                                                                                             |
| 10.1111/jvh.13631                    | CAP-B Score          | D | -        | Adult patients with CHB diagnosis from the NHIS database                                                         | 2005 | 2015 | 2017 | -       | HBV infected        | South Korea | <5-SLD/advanced liver disease/cirrhosis/liver death  | Sex, age, medical aid, income, chronic hepatitis C, diabetes mellitus, statin exposure, antiplatelet exposure, smoking, ALT, GGT*alcohol consumption                          |
|                                      | CAP-B Score          | D | -        | Adult patients with CHB diagnosis from the NHIS database                                                         | 2005 | 2015 | 2017 | -       | HBV infected        | South Korea | 5-SLD/advanced liver disease/cirrhosis/liver death   | Sex, age, medical aid, income, chronic hepatitis C, diabetes mellitus, statin exposure, antiplatelet exposure, smoking, ALT, GGT*alcohol consumption                          |
|                                      | CAP-B Score          | D | -        | Adult patients with CHB diagnosis from the NHIS database                                                         | 2005 | 2015 | 2017 | -       | HBV infected        | South Korea | 10-SLD/advanced liver disease/cirrhosis/liver death  | Sex, age, medical aid, income, chronic hepatitis C, diabetes mellitus, statin exposure, antiplatelet exposure, smoking, ALT, GGT*alcohol consumption                          |
|                                      | CAP-B Score          | V | Internal | Adult patients with CHB diagnosis from the NHIS database                                                         | 2005 | 2015 | 2017 | -       | HBV infected        | South Korea | <5-SLD/advanced liver disease/cirrhosis/liver death  | Sex, age, medical aid, low income, intermediate income, chronic hepatitis C, diabetes mellitus, statin exposure, antiplatelet exposure, smoking, ALT, GGT*alcohol consumption |
|                                      | CAP-B Score          | V | Internal | Adult patients with CHB diagnosis from the NHIS database                                                         | 2005 | 2015 | 2017 | -       | HBV infected        | South Korea | 5-SLD/advanced liver disease/cirrhosis/liver death   | Sex, age, medical aid, low income, intermediate income, chronic hepatitis C, diabetes mellitus, statin exposure, antiplatelet exposure, smoking, ALT, GGT*alcohol consumption |
|                                      | CAP-B Score          | V | Internal | Adult patients with CHB diagnosis from the NHIS database                                                         | 2005 | 2015 | 2017 | -       | HBV infected        | South Korea | 10-SLD/advanced liver disease/cirrhosis/liver death  | Sex, age, medical aid, low income, intermediate income, chronic hepatitis C, diabetes mellitus, statin exposure, antiplatelet exposure, smoking, ALT, GGT*alcohol consumption |
| 10.1053/j.gastro.2019.09.008         | APRI                 | V | External | AMORIS                                                                                                           | 1985 | 1996 | -    | -       | general people      | Sweden      | 5-SLD/advanced liver disease/cirrhosis/liver death   | AST, platelet count                                                                                                                                                           |
|                                      | APRI                 | V | External | AMORIS                                                                                                           | 1985 | 1996 | -    | -       | general people      | Sweden      | 10-SLD/advanced liver disease/cirrhosis/liver death  | AST, platelet count                                                                                                                                                           |
|                                      | APRI                 | V | External | AMORIS                                                                                                           | 1985 | 1996 | -    | -       | general people      | Sweden      | >10-SLD/advanced liver disease/cirrhosis/liver death | AST, platelet count                                                                                                                                                           |
|                                      | BARD                 | V | External | AMORIS                                                                                                           | 1985 | 1996 | -    | -       | general people      | Sweden      | 5-SLD/advanced liver disease/cirrhosis/liver death   | BMI, AST, ALT, diabetes                                                                                                                                                       |
|                                      | BARD                 | V | External | AMORIS                                                                                                           | 1985 | 1996 | -    | -       | general people      | Sweden      | 10-SLD/advanced liver disease/cirrhosis/liver death  | BMI, AST, ALT, diabetes                                                                                                                                                       |
|                                      | BARD                 | V | External | AMORIS                                                                                                           | 1985 | 1996 | -    | -       | general people      | Sweden      | >10-SLD/advanced liver disease/cirrhosis/liver death | BMI, AST, ALT, diabetes                                                                                                                                                       |
|                                      | FIB-4                | V | External | AMORIS                                                                                                           | 1985 | 1996 | -    | -       | general people      | Sweden      | 5-SLD/advanced liver disease/cirrhosis/liver death   | Age, AST, platelets, ALT                                                                                                                                                      |
|                                      | FIB-4                | V | External | AMORIS                                                                                                           | 1985 | 1996 | -    | -       | general people      | Sweden      | 10-SLD/advanced liver disease/cirrhosis/liver death  | Age, AST, platelets, ALT                                                                                                                                                      |
|                                      | FIB-4                | V | External | AMORIS                                                                                                           | 1985 | 1996 | -    | -       | general people      | Sweden      | >10-SLD/advanced liver disease/cirrhosis/liver death | Age, AST, platelets, ALT                                                                                                                                                      |
|                                      | Forns Score          | V | External | AMORIS                                                                                                           | 1985 | 1996 | -    | -       | general people      | Sweden      | 5-SLD/advanced liver disease/cirrhosis/liver death   | Platelet count, GT, age, cholesterol                                                                                                                                          |
|                                      | Forns Score          | V | External | AMORIS                                                                                                           | 1985 | 1996 | -    | -       | general people      | Sweden      | 10-SLD/advanced liver disease/cirrhosis/liver death  | Platelet count, GT, age, cholesterol                                                                                                                                          |
|                                      | Forns Score          | V | External | AMORIS                                                                                                           | 1985 | 1996 | -    | -       | general people      | Sweden      | >10-SLD/advanced liver disease/cirrhosis/liver death | Platelet count, GT, age, cholesterol                                                                                                                                          |
|                                      | NAFLD Fibrosis Score | V | External | AMORIS                                                                                                           | 1985 | 1996 | -    | -       | general people      | Sweden      | 5-SLD/advanced liver disease/cirrhosis/liver death   | age, BMI, diabetes, AST, ALT, platelet count, albumin                                                                                                                         |
|                                      | NAFLD Fibrosis Score | V | External | AMORIS                                                                                                           | 1985 | 1996 | -    | -       | general people      | Sweden      | 10-SLD/advanced liver disease/cirrhosis/liver death  | age, BMI, diabetes, AST, ALT, platelet count, albumin                                                                                                                         |
|                                      | NAFLD Fibrosis Score | V | External | AMORIS                                                                                                           | 1985 | 1996 | -    | -       | general people      | Sweden      | >10-SLD/advanced liver disease/cirrhosis/liver death | age, BMI, diabetes, AST, ALT, platelet count, albumin                                                                                                                         |
|                                      | APRI                 | V | External | AMORIS                                                                                                           | 1985 | 1996 | -    | -       | general people      | Sweden      | 10-SLD/advanced liver disease/cirrhosis/liver death  | AST, platelet count                                                                                                                                                           |
|                                      | BARD                 | V | External | AMORIS                                                                                                           | 1985 | 1996 | -    | -       | general people      | Sweden      | 10-SLD/advanced liver disease/cirrhosis/liver death  | BMI, AST, ALT, diabetes                                                                                                                                                       |
|                                      | FIB-4                | V | External | AMORIS                                                                                                           | 1985 | 1996 | -    | -       | general people      | Sweden      | 10-SLD/advanced liver disease/cirrhosis/liver death  | Age, AST, platelets, ALT                                                                                                                                                      |
|                                      | Forns Score          | V | External | AMORIS                                                                                                           | 1985 | 1996 | -    | -       | general people      | Sweden      | 10-SLD/advanced liver disease/cirrhosis/liver death  | Platelet count, GT, age, cholesterol                                                                                                                                          |
|                                      | NAFLD Fibrosis Score | V | External | AMORIS                                                                                                           | 1985 | 1996 | -    | -       | general people      | Sweden      | 10-SLD/advanced liver disease/cirrhosis/liver death  | age, BMI, diabetes, AST, ALT, platelet count, albumin                                                                                                                         |
|                                      | D'AS                 | D | -        | patients who received care at Samsung Medical Center, Seoul, Korea                                               | 2006 | 2011 | 2014 | -       | HBV infected        | South Korea | <5-HCC/PLC/liver cancer                              | Sex, age, ALT, HBeAg and HBV DNA levels                                                                                                                                       |
|                                      | D'AS                 | D | -        | patients who received care at Samsung Medical Center, Seoul, Korea                                               | 2006 | 2011 | 2014 | -       | HBV infected        | South Korea | <5-HCC/PLC/liver cancer                              | Sex, age, ALT, HBeAg and HBV DNA levels                                                                                                                                       |
|                                      | D'AS                 | D | -        | patients who received care at Samsung Medical Center, Seoul, Korea                                               | 2006 | 2011 | 2014 | -       | HBV infected        | South Korea | <5-HCC/PLC/liver cancer                              | Sex, age, ALT, HBeAg and HBV DNA levels                                                                                                                                       |

|                            |         |   |          |                                                                                                                            |      |      |      |            |                |             |                           |                                                                                                                                                                                                                                                                                                                               |
|----------------------------|---------|---|----------|----------------------------------------------------------------------------------------------------------------------------|------|------|------|------------|----------------|-------------|---------------------------|-------------------------------------------------------------------------------------------------------------------------------------------------------------------------------------------------------------------------------------------------------------------------------------------------------------------------------|
| 10.5009/gn16403            | D'AS    | D | -        | patients who received care at Samsung Medical Center, Seoul, Korea                                                         | 2006 | 2011 | 2014 | -          | HBV infected   | South Korea | 5-HCC/PLC/liver cancer    | Sex, age, ALT, HBeAg and HBV DNA levels                                                                                                                                                                                                                                                                                       |
|                            | D'AS    | D | -        | patients who received care at Samsung Medical Center, Seoul, Korea                                                         | 2006 | 2011 | 2014 | -          | HBV infected   | South Korea | 5~10-HCC/PLC/liver cancer | Sex, age, ALT, HBeAg and HBV DNA levels                                                                                                                                                                                                                                                                                       |
|                            | D'AS    | V | External | f patients who received care at Seoul National University Hospital                                                         | 2006 | 2011 | 2014 | -          | HBV infected   | South Korea | <5-HCC/PLC/liver cancer   | Sex, age, ALT, HBeAg and HBV DNA levels                                                                                                                                                                                                                                                                                       |
|                            | D'AS    | V | External | f patients who received care at Seoul National University Hospital                                                         | 2006 | 2011 | 2014 | -          | HBV infected   | South Korea | <5-HCC/PLC/liver cancer   | Sex, age, ALT, HBeAg and HBV DNA levels                                                                                                                                                                                                                                                                                       |
|                            | D'AS    | V | External | f patients who received care at Seoul National University Hospital                                                         | 2006 | 2011 | 2014 | -          | HBV infected   | South Korea | <5-HCC/PLC/liver cancer   | Sex, age, ALT, HBeAg and HBV DNA levels                                                                                                                                                                                                                                                                                       |
|                            | D'AS    | V | External | f patients who received care at Seoul National University Hospital                                                         | 2006 | 2011 | 2014 | -          | HBV infected   | South Korea | 5-HCC/PLC/liver cancer    | Sex, age, ALT, HBeAg and HBV DNA levels                                                                                                                                                                                                                                                                                       |
|                            | D'AS    | V | External | f patients who received care at Seoul National University Hospital                                                         | 2006 | 2011 | 2014 | -          | HBV infected   | South Korea | 5~10-HCC/PLC/liver cancer | Sex, age, ALT, HBeAg and HBV DNA levels                                                                                                                                                                                                                                                                                       |
| 10.1186/s12885-021-08498-w | An-2021 | D | -        | NHIS-2020-2-146                                                                                                            | 2004 | 2007 | 2015 | 11.1 years | general people | South Korea | 5~10-HCC/PLC/liver cancer | age, sex, obesity, income level, the family history of chronic liver disease, ALT, GGT, total blood cholesterol level, and preexisting chronic liver disease, chronic hepatitis virus infection, HIV infection, DM, dyslipidemia, or schizophrenic/delusional disorders or mental disorders due to psychoactive substance use |
|                            | An-2021 | V | Internal | NHIS-2020-2-146                                                                                                            | 2004 | 2007 | 2015 | 9.1 years  | general people | South Korea | 5~10-HCC/PLC/liver cancer | age, sex, obesity, liver function tests, the family history of chronic liver disease, underlying chronic liver disease, chronic hepatitis virus or human immunodeficiency virus infection, and diabetes mellitus income, total cholesterol, and underlying dyslipidemia or schizophrenic/delusional disorders                 |
| 10.1002/rjc.33487          | CKB-PLR | D | -        | China Kadoorie Biobank                                                                                                     | 2004 | 2008 | 2017 | -          | general people | China       | 10-HCC/PLC/liver cancer   | Age, gender, residential area, level of education, previous cancer diagnosis, family history of cancer, history of cirrhosis or chronic hepatitis, history of gall stone or gall bladder disease, BMI, physical activity, random glucose, alcohol smoking                                                                     |
|                            | CKB-PLR | V | Internal | China Kadoorie Biobank                                                                                                     | 2004 | 2008 | 2017 | -          | general people | China       | 10-HCC/PLC/liver cancer   | Age, gender, residential area, level of education, previous cancer diagnosis, family history of cancer, history of cirrhosis or chronic hepatitis, history of gall stone or gall bladder disease, BMI, physical activity, random glucose, alcohol smoking                                                                     |
|                            | GAG-HCC | V | External | Screening and Surveillance of Hepatocellular Carcinoma Project at Chulabhorn Hospital, Bangkok, Thailand, during July 2010 | 2010 | 2017 | -    | -          | HBV infected   | Thailand    | 5-HCC/PLC/liver cancer    | liver cirrhosis, age, sex, hepatitis B virus DNA load                                                                                                                                                                                                                                                                         |
|                            | CU-HCC  | V | External | Screening and Surveillance of Hepatocellular Carcinoma Project at Chulabhorn Hospital, Bangkok, Thailand, during July 2010 | 2010 | 2017 | -    | -          | HBV infected   | Thailand    | 5-HCC/PLC/liver cancer    | serum albumin, bilirubin levels, liver stiffness                                                                                                                                                                                                                                                                              |
|                            | REACH-B | V | External | Screening and Surveillance of Hepatocellular Carcinoma Project at Chulabhorn Hospital, Bangkok, Thailand, during July 2010 | 2010 | 2017 | -    | -          | HBV infected   | Thailand    | 5-HCC/PLC/liver cancer    | sex, age, ALT, HBeAg status and HBVDNA                                                                                                                                                                                                                                                                                        |
|                            | PAGE-B  | V | External | Screening and Surveillance of Hepatocellular Carcinoma Project at Chulabhorn Hospital, Bangkok, Thailand, during July 2010 | 2010 | 2017 | -    | -          | HBV infected   | Thailand    | 5-HCC/PLC/liver cancer    | platelet, age, sex                                                                                                                                                                                                                                                                                                            |

|                   |                     |   |          |                                                                                                                            |      |      |      |   |                |                                                                                                     |                         |                                                                                  |
|-------------------|---------------------|---|----------|----------------------------------------------------------------------------------------------------------------------------|------|------|------|---|----------------|-----------------------------------------------------------------------------------------------------|-------------------------|----------------------------------------------------------------------------------|
| 10.1111/jvh.13517 | mPAGE-B             | V | External | Screening and Surveillance of Hepatocellular Carcinoma Project at Chulabhorn Hospital, Bangkok, Thailand, during July 2010 | 2010 | 2017 | -    | - | HBV infected   | Thailand                                                                                            | 5-HCC/PLC/liver cancer  | platelet, age, sex, albumin                                                      |
|                   | CAMD                | V | External | Screening and Surveillance of Hepatocellular Carcinoma Project at Chulabhorn Hospital, Bangkok, Thailand, during July 2010 | 2010 | 2017 | -    | - | HBV infected   | Thailand                                                                                            | 5-HCC/PLC/liver cancer  | cirrhosis, age, sex, diabetes                                                    |
|                   | AASL                | V | External | Screening and Surveillance of Hepatocellular Carcinoma Project at Chulabhorn Hospital, Bangkok, Thailand, during July 2010 | 2010 | 2017 | -    | - | HBV infected   | Thailand                                                                                            | 5-HCC/PLC/liver cancer  | age, albumin, sex, cirrhosis                                                     |
|                   | LSM-HCC             | V | External | Screening and Surveillance of Hepatocellular Carcinoma Project at Chulabhorn Hospital, Bangkok, Thailand, during July 2010 | 2010 | 2017 | -    | - | HBV infected   | Thailand                                                                                            | 5-HCC/PLC/liver cancer  | liver stiffness, age, albumin, HBV DNA                                           |
|                   | mREACH-B            | V | External | Screening and Surveillance of Hepatocellular Carcinoma Project at Chulabhorn Hospital, Bangkok, Thailand, during July 2010 | 2010 | 2017 | -    | - | HBV infected   | Thailand                                                                                            | 5-HCC/PLC/liver cancer  | sex, age, ALT, HBeAg, liver stiffness                                            |
| 10.3390/v14040732 | PAGE-B              | V | External | Liver Studies Center of the University Hospital of the Federal University of Maranhão                                      | -    | -    | -    | - | HBV infected   | Brazil                                                                                              | <5-HCC/PLC/liver cancer | age, sex and platelets                                                           |
|                   | PAGE-B              | V | External | Liver Studies Center of the University Hospital of the Federal University of Maranhão                                      | -    | -    | -    | - | HBV infected   | Brazil                                                                                              | <5-HCC/PLC/liver cancer | age, sex and platelets                                                           |
|                   | PAGE-B              | V | External | Liver Studies Center of the University Hospital of the Federal University of Maranhão                                      | -    | -    | -    | - | HBV infected   | Brazil                                                                                              | <5-HCC/PLC/liver cancer | age, sex and platelets                                                           |
|                   | REACH-B             | V | External | Liver Studies Center of the University Hospital of the Federal University of Maranhão                                      | -    | -    | -    | - | HBV infected   | Brazil                                                                                              | <5-HCC/PLC/liver cancer | sex, age, ALT, HBeAg status and HBVDNA                                           |
|                   | REACH-B             | V | External | Liver Studies Center of the University Hospital of the Federal University of Maranhão                                      | -    | -    | -    | - | HBV infected   | Brazil                                                                                              | <5-HCC/PLC/liver cancer | sex, age, ALT, HBeAg status and HBVDNA                                           |
|                   | REACH-B             | V | External | Liver Studies Center of the University Hospital of the Federal University of Maranhão                                      | -    | -    | -    | - | HBV infected   | Brazil                                                                                              | <5-HCC/PLC/liver cancer | sex, age, ALT, HBeAg status and HBVDNA                                           |
|                   | Modified HLI        | V | Internal | (EPIC) cohort                                                                                                              | 1992 | 2000 | 2010 | - | general people | Denmark, France, Germany, Greece, Italy, Netherlands, Norway, Spain, Sweden, and the United Kingdom | 10-HCC/PLC/liver cancer | diet, BMI, physical activity, lifetime alcohol, smoking, diabetes, and hepatitis |
|                   | Lifestyle signature | D | -        | (EPIC) cohort                                                                                                              | 1992 | 2000 | 2010 | - | general people | Denmark, France, Germany, Greece, Italy, Netherlands, Norway, Spain, Sweden, and the United Kingdom | 10-HCC/PLC/liver cancer | diet, BMI, physical activity, lifetime alcohol, smoking, diabetes, and hepatitis |

|                              |                                              |   |          |                                                            |      |      |      |            |                |                                                                                                     |                                                      |                                                                                                |
|------------------------------|----------------------------------------------|---|----------|------------------------------------------------------------|------|------|------|------------|----------------|-----------------------------------------------------------------------------------------------------|------------------------------------------------------|------------------------------------------------------------------------------------------------|
| 10.1093/ajcn/nqy074          | Metabolic signature                          | D | -        | (EPIC) cohort                                              | 1992 | 2000 | 2010 | -          | general people | Denmark, France, Germany, Greece, Italy, Netherlands, Norway, Spain, Sweden, and the United Kingdom | 10-HCC/PLC/liver cancer                              | Glutamic acid, Hexoses, SM(OH)C14:1, SM(OH)C16:1, SM(OH)C22:2, PCaaC32:1, Liver function score |
|                              | LFS                                          | D | -        | (EPIC) cohort                                              | 1992 | 2000 | 2010 | -          | general people | Denmark, France, Germany, Greece, Italy, Netherlands, Norway, Spain, Sweden, and the United Kingdom | 10-HCC/PLC/liver cancer                              | ALT,AST, GGT, alkaline phosphatase, albumin, total bilirubin                                   |
|                              | LFS + lifestyle signature                    | D | -        | (EPIC) cohort                                              | 1992 | 2000 | 2010 | -          | general people | Denmark, France, Germany, Greece, Italy, Netherlands, Norway, Spain, Sweden, and the United Kingdom | 10-HCC/PLC/liver cancer                              | diet, BMI, physical activity, lifetime alcohol, smoking, diabetes, and hepatitis               |
|                              | LFS + metabolic signature                    | D | -        | (EPIC) cohort                                              | 1992 | 2000 | 2010 | -          | general people | Denmark, France, Germany, Greece, Italy, Netherlands, Norway, Spain, Sweden, and the United Kingdom | 10-HCC/PLC/liver cancer                              | Glutamic acid, Hexoses, SMC16:1, SM(OH)C14:1, SM(OH)C22:2, LysoPC aC28:1, PC aeC30:2           |
| 10.1038/ajg.2017.254         | FIB-4                                        | V | External | ÉRADICATE-B                                                | 1985 | 2000 | -    | -          | HBV infected   | Taiwan                                                                                              | >10-SLD/advanced liver disease/cirrhosis/liver death | age, AST, platelet counts, ALT                                                                 |
| 10.1038/s41416-022-01851-1   | aMAP score                                   | V | External | HCC surveillance programme at the Ogaki Municipal Hospital | 1998 | 2014 | 2021 | 11.8 years | general people | Japan                                                                                               | >10-HCC/PLC/liver cancer                             | Age, sex, bilirubin, albumin, platelets                                                        |
| 10.2147/ott.S51986           | Transient elastography-based risk estimation | D | -        | -                                                          | 2005 | 2007 | -    | -          | HBV infected   | Korea                                                                                               | <5-HCC/PLC/liver cancer                              | age, male gender, and liver stiffness values, hepatitis B virus DNA                            |
|                              | Transient elastography-based risk estimation | V | Internal | -                                                          | 2005 | 2007 | -    | -          | HBV infected   | Korea                                                                                               | <5-HCC/PLC/liver cancer                              | age, male gender, and liver stiffness values, hepatitis B virus DNA                            |
| 10.1371/journal.pone.0208141 | CS Cox model (average)                       | D | -        | VHA data                                                   | 2000 | 2016 | -    | 7 years    | HCV infected   | US                                                                                                  | <5-SLD/advanced liver disease/cirrhosis/liver death  | Variable selection frequency for CS Cox model: see supplementary                               |
|                              | CS Cox model (average)                       | D | -        | VHA data                                                   | 2000 | 2016 | -    | 7 years    | HCV infected   | US                                                                                                  | <5-SLD/advanced liver disease/cirrhosis/liver death  | Variable selection frequency for CS Cox model: see supplementary                               |
|                              | CS Cox model (average)                       | D | -        | VHA data                                                   | 2000 | 2016 | -    | 7 years    | HCV infected   | US                                                                                                  | 5-SLD/advanced liver disease/cirrhosis/liver death   | Variable selection frequency for CS Cox model: see supplementary                               |
|                              | longitudinal Cox model (average)             | D | -        | VHA data                                                   | 2000 | 2016 | -    | 7 years    | HCV infected   | US                                                                                                  | <5-SLD/advanced liver disease/cirrhosis/liver death  | Variable selection frequency for CS Cox model: see supplementary                               |
|                              | longitudinal Cox model (average)             | D | -        | VHA data                                                   | 2000 | 2016 | -    | 7 years    | HCV infected   | US                                                                                                  | <5-SLD/advanced liver disease/cirrhosis/liver death  | Variable selection frequency for CS Cox model: see supplementary                               |
|                              | longitudinal Cox model (average)             | D | -        | VHA data                                                   | 2000 | 2016 | -    | 7 years    | HCV infected   | US                                                                                                  | 5-SLD/advanced liver disease/cirrhosis/liver death   | Variable selection frequency for CS Cox model: see supplementary                               |
|                              | CS boosting model (average)                  | D | -        | VHA data                                                   | 2000 | 2016 | -    | 7 years    | HCV infected   | US                                                                                                  | <5-SLD/advanced liver disease/cirrhosis/liver death  | Variable selection frequency for CS Cox model: see supplementary                               |
|                              | CS boosting model (average)                  | D | -        | VHA data                                                   | 2000 | 2016 | -    | 7 years    | HCV infected   | US                                                                                                  | <5-SLD/advanced liver disease/cirrhosis/liver death  | Variable selection frequency for CS Cox model: see supplementary                               |
|                              | CS boosting model (average)                  | D | -        | VHA data                                                   | 2000 | 2016 | -    | 7 years    | HCV infected   | US                                                                                                  | 5-SLD/advanced liver disease/cirrhosis/liver death   | Variable selection frequency for CS Cox model: see supplementary                               |
|                              | longitudinal boosting model (average)        | D | -        | VHA data                                                   | 2000 | 2016 | -    | 7 years    | HCV infected   | US                                                                                                  | <5-SLD/advanced liver disease/cirrhosis/liver death  | Variable selection frequency for CS Cox model: see supplementary                               |
|                              | longitudinal boosting model (average)        | D | -        | VHA data                                                   | 2000 | 2016 | -    | 7 years    | HCV infected   | US                                                                                                  | <5-SLD/advanced liver disease/cirrhosis/liver death  | Variable selection frequency for CS Cox model: see supplementary                               |
|                              | longitudinal boosting model (average)        | D | -        | VHA data                                                   | 2000 | 2016 | -    | 7 years    | HCV infected   | US                                                                                                  | 5-SLD/advanced liver disease/cirrhosis/liver death   | Variable selection frequency for CS Cox model: see supplementary                               |
|                              | CS Cox model (closest)                       | D | -        | VHA data                                                   | 2000 | 2016 | -    | 7 years    | HCV infected   | US                                                                                                  | <5-SLD/advanced liver disease/cirrhosis/liver death  | Variable selection frequency for CS Cox model: see supplementary                               |
|                              | CS boosting model (closest)                  | D | -        | VHA data                                                   | 2000 | 2016 | -    | 7 years    | HCV infected   | US                                                                                                  | <5-SLD/advanced liver disease/cirrhosis/liver death  | Variable selection frequency for CS Cox model: see supplementary                               |
|                              | longitudinal Cox model (closest)             | D | -        | VHA data                                                   | 2000 | 2016 | -    | 7 years    | HCV infected   | US                                                                                                  | <5-SLD/advanced liver disease/cirrhosis/liver death  | Variable selection frequency for CS Cox model: see supplementary                               |
|                              | longitudinal boosting model (closest)        | D | -        | VHA data                                                   | 2000 | 2016 | -    | 7 years    | HCV infected   | US                                                                                                  | <5-SLD/advanced liver disease/cirrhosis/liver death  | Variable selection frequency for CS Cox model: see supplementary                               |
|                              | CS Cox model (closest)                       | D | -        | VHA data                                                   | 2000 | 2016 | -    | 7 years    | HCV infected   | US                                                                                                  | <5-SLD/advanced liver disease/cirrhosis/liver death  | Variable selection frequency for CS Cox model: see supplementary                               |
|                              | CS boosting model (closest)                  | D | -        | VHA data                                                   | 2000 | 2016 | -    | 7 years    | HCV infected   | US                                                                                                  | <5-SLD/advanced liver disease/cirrhosis/liver death  | Variable selection frequency for CS Cox model: see supplementary                               |
|                              | longitudinal Cox model (closest)             | D | -        | VHA data                                                   | 2000 | 2016 | -    | 7 years    | HCV infected   | US                                                                                                  | <5-SLD/advanced liver disease/cirrhosis/liver death  | Variable selection frequency for CS Cox model: see supplementary                               |
|                              | longitudinal boosting model (closest)        | D | -        | VHA data                                                   | 2000 | 2016 | -    | 7 years    | HCV infected   | US                                                                                                  | 5-SLD/advanced liver disease/cirrhosis/liver death   | Variable selection frequency for CS Cox model: see supplementary                               |
| 10.1093/infdis/jiaa330       | Le-2021                                      | D | -        | San Francisco Bay Area Cohort                              | 2000 | 2016 | -    | -          | HBV infected   | US                                                                                                  | <5-SLD/advanced liver disease/cirrhosis/liver death  | Sex, age, diabetes, antiviral treatment status/duration, hepatitis B e-antigen, ALT, AST       |
|                              | Le-2021                                      | D | -        | San Francisco Bay Area Cohort                              | 2000 | 2016 | -    | -          | HBV infected   | US                                                                                                  | 5-SLD/advanced liver disease/cirrhosis/liver death   | Sex, age, diabetes, antiviral treatment status/duration, hepatitis B e-antigen, ALT, AST       |
|                              | Le-2021                                      | D | -        | San Francisco Bay Area Cohort                              | 2000 | 2016 | -    | -          | HBV infected   | US                                                                                                  | 10-SLD/advanced liver disease/cirrhosis/liver death  | Sex, age, diabetes, antiviral treatment status/duration, hepatitis B e-antigen, ALT, AST       |
|                              | Le-2021                                      | V | External | Kaohsiung Medical University Hospital in Kaohsiung, Taiwan | -    | -    | -    | -          | HBV infected   | Taiwan                                                                                              | <5-SLD/advanced liver disease/cirrhosis/liver death  | Sex, age, diabetes, antiviral treatment status/duration, hepatitis B e-antigen, ALT, AST       |

|                           |                      |   |          |                                                                             |      |      |      |             |                     |                                                                                                                     |                                                      |                                                                                                      |
|---------------------------|----------------------|---|----------|-----------------------------------------------------------------------------|------|------|------|-------------|---------------------|---------------------------------------------------------------------------------------------------------------------|------------------------------------------------------|------------------------------------------------------------------------------------------------------|
|                           | Le-2021              | V | External | Kaohsiung Medical University Hospital in Kaohsiung, Taiwan                  | -    | -    | -    | -           | HBV infected        | Taiwan                                                                                                              | 5-SLD/advanced liver disease/cirrhosis/liver death   | Sex, age, diabetes, antiviral treatment status/duration, hepatitis B e-antigen, ALT, AST             |
|                           | Le-2021              | V | External | Kaohsiung Medical University Hospital in Kaohsiung, Taiwan                  | -    | -    | -    | -           | HBV infected        | Taiwan                                                                                                              | 10-SLD/advanced liver disease/cirrhosis/liver death  | Sex, age, diabetes, antiviral treatment status/duration, hepatitis B e-antigen, ALT, AST             |
| 10.3389/fonc.2021.762662  | Cao-2021             | D | -        | CCOP-LC cohort                                                              | 2017 | -    | 2020 | -           | HBV infected        | Binhai county,Lingbi county, Mengcheng county, Sheyang county, Shenqiu county, Dancheng county, and Yingdong county | <5-HCC/PLC/liver cancer                              | Sex, Age ,BMI ,Alcohol consumption (g/week ethanol), Liver diseases in mothers, Psychological trauma |
|                           | Cao-2021             | D | -        | CCOP-LC cohort                                                              | 2017 | -    | 2020 | -           | HBV infected        | Binhai county,Lingbi county, Mengcheng county, Sheyang county, Shenqiu county, Dancheng county, and Yingdong county | <5-HCC/PLC/liver cancer                              | Sex, Age ,BMI ,Alcohol consumption (g/week ethanol), Liver diseases in mothers, Psychological trauma |
|                           | Cao-2021             | D | -        | CCOP-LC cohort                                                              | 2017 | -    | 2020 | -           | HBV infected        | Binhai county,Lingbi county, Mengcheng county, Sheyang county, Shenqiu county, Dancheng county, and Yingdong county | <5-HCC/PLC/liver cancer                              | Sex, Age ,BMI ,Alcohol consumption (g/week ethanol), Liver diseases in mothers, Psychological trauma |
|                           | Cao-2021             | V | Internal | CCOP-LC cohort                                                              | 2017 | -    | 2020 | -           | HBV infected        | Binhai county,Lingbi county, Mengcheng county, Sheyang county, Shenqiu county, Dancheng county, and Yingdong county | <5-HCC/PLC/liver cancer                              | Sex, Age ,BMI ,Alcohol consumption (g/week ethanol), Liver diseases in mothers, Psychological trauma |
| 10.1016/j.egh.2018.11.030 | NAFLD Fibrosis Score | V | External | Karolinska University Hospital (Huddinge) and Linköping University Hospital | 1971 | 2009 | 2014 | 19.9 years  | patients with NAFLD | Sweden                                                                                                              | >10-SLD/advanced liver disease/cirrhosis/liver death | age, BMI, hyperglycemia or diabetes, AST/ALT ratio, platelet, albumin                                |
|                           | FIB-4                | V | External | Karolinska University Hospital (Huddinge) and Linköping University Hospital | 1971 | 2009 | 2014 | 19.9 years  | patients with NAFLD | Sweden                                                                                                              | >10-SLD/advanced liver disease/cirrhosis/liver death | Platelets, age, aspartate aminotransferase (AST), ALT                                                |
|                           | APRI                 | V | External | Karolinska University Hospital (Huddinge) and Linköping University Hospital | 1971 | 2009 | 2014 | 19.9 years  | patients with NAFLD | Sweden                                                                                                              | >10-SLD/advanced liver disease/cirrhosis/liver death | AST, platelet count                                                                                  |
|                           | BARD                 | V | External | Karolinska University Hospital (Huddinge) and Linköping University Hospital | 1971 | 2009 | 2014 | 19.9 years  | patients with NAFLD | Sweden                                                                                                              | >10-SLD/advanced liver disease/cirrhosis/liver death | BMI, AST, ALT, diabetes                                                                              |
|                           | LS-Based Model 1     | D | -        | Severance Hospital, Samsung Medical Center, and Gangnam Severance Hospital  | 2012 | 2020 | -    | 60.7 months | patients with NAFLD | Korea                                                                                                               | 5-HCC/PLC/liver cancer                               | age, platelet count, and categorized LS,together with AST level (>34 IU/mL)                          |
|                           | LS-Based Model 1     | D | -        | Severance Hospital, Samsung Medical Center, and Gangnam Severance Hospital  | 2012 | 2020 | -    | 60.7 months | patients with NAFLD | Korea                                                                                                               | <5-HCC/PLC/liver cancer                              | age, platelet count, and categorized LS,together with AST level (>34 IU/mL)                          |
|                           | LS-Based Model 1     | D | -        | Severance Hospital, Samsung Medical Center, and Gangnam Severance Hospital  | 2012 | 2020 | -    | 60.7 months | patients with NAFLD | Korea                                                                                                               | <5-HCC/PLC/liver cancer                              | age, platelet count, and categorized LS,together with AST level (>34 IU/mL)                          |
|                           | LS-Based Model 1     | D | -        | Severance Hospital, Samsung Medical Center, and Gangnam Severance Hospital  | 2012 | 2020 | -    | 60.7 months | patients with NAFLD | Korea                                                                                                               | 5-HCC/PLC/liver cancer                               | age, platelet count, and categorized LS,together with AST level (>34 IU/mL)                          |
|                           | LS-Based Model 2     | D | -        | Severance Hospital, Samsung Medical Center, and Gangnam Severance Hospital  | 2012 | 2020 | -    | 60.7 months | patients with NAFLD | Korea                                                                                                               | 5-HCC/PLC/liver cancer                               | age, platelet count, and categorized LS,together with AST level (>34 IU/mL)                          |
|                           | LS-Based Model 2     | D | -        | Severance Hospital, Samsung Medical Center, and Gangnam Severance Hospital  | 2012 | 2020 | -    | 60.7 months | patients with NAFLD | Korea                                                                                                               | <5-HCC/PLC/liver cancer                              | age, platelet count, and categorized LS,together with AST level (>34 IU/mL)                          |
|                           | LS-Based Model 2     | D | -        | Severance Hospital, Samsung Medical Center, and Gangnam Severance Hospital  | 2012 | 2020 | -    | 60.7 months | patients with NAFLD | Korea                                                                                                               | <5-HCC/PLC/liver cancer                              | age, platelet count, and categorized LS,together with AST level (>34 IU/mL)                          |



|                             |                        |     |          |                                             |      |      |      |             |                        |           |                           |                                                                                                                                                                                                                                                                                                                                                |
|-----------------------------|------------------------|-----|----------|---------------------------------------------|------|------|------|-------------|------------------------|-----------|---------------------------|------------------------------------------------------------------------------------------------------------------------------------------------------------------------------------------------------------------------------------------------------------------------------------------------------------------------------------------------|
|                             | LS-Based Model 2       | V   | External | Kyungpook National University Hospital      | -    | -    | -    | 28.2 months | patients with NAFLD    | Korea     | <5-HCC/PLC/liver cancer   | age, platelet count, and categorized LS,together with AST level (>34 IU/mL)                                                                                                                                                                                                                                                                    |
|                             | LS-Based Model 2       | V   | External | Kyungpook National University Hospital      | -    | -    | -    | 28.2 months | patients with NAFLD    | Korea     | 5-HCC/PLC/liver cancer    | age, platelet count, and categorized LS,together with AST level (>34 IU/mL)                                                                                                                                                                                                                                                                    |
|                             | LS-Based Model 3       | V   | External | Kyungpook National University Hospital      | -    | -    | -    | 28.2 months | patients with NAFLD    | Korea     | 5-HCC/PLC/liver cancer    | age, platelet count, and categorized LS,together with AST level (>34 IU/mL)                                                                                                                                                                                                                                                                    |
|                             | LS-Based Model 3       | V   | External | Kyungpook National University Hospital      | -    | -    | -    | 28.2 months | patients with NAFLD    | Korea     | <5-HCC/PLC/liver cancer   | age, platelet count, and categorized LS,together with AST level (>34 IU/mL)                                                                                                                                                                                                                                                                    |
|                             | LS-Based Model 3       | V   | External | Kyungpook National University Hospital      | -    | -    | -    | 28.2 months | patients with NAFLD    | Korea     | <5-HCC/PLC/liver cancer   | age, platelet count, and categorized LS,together with AST level (>34 IU/mL)                                                                                                                                                                                                                                                                    |
|                             | LS-Based Model 3       | V   | External | Kyungpook National University Hospital      | -    | -    | -    | 28.2 months | patients with NAFLD    | Korea     | 5-HCC/PLC/liver cancer    | age, platelet count, and categorized LS,together with AST level (>34 IU/mL)                                                                                                                                                                                                                                                                    |
| 10.1111/apt.15082           | LCR1                   | D   | -        | Groupe Hospitalier Pitié Salpêtrière cohort | 1997 | 2012 | -    | -           | general people         | France    | 10-HCC/PLC/liver cancer   | hepatoprotective proteins (apolipoproteinA1, haptoglobin) , gender, age, gamma-glutamyltranspeptidase, marker of fibrosis (alpha2-macroglobulin)                                                                                                                                                                                               |
|                             | LCR1                   | V   | Internal | Groupe Hospitalier Pitié Salpêtrière cohort | 1997 | 2012 | -    | -           | general people         | France    | 10-HCC/PLC/liver cancer   | hepatoprotective proteins (apolipoproteinA1, haptoglobin) , gender, age, gamma-glutamyltranspeptidase, marker of fibrosis (alpha2-macroglobulin)                                                                                                                                                                                               |
|                             | LCR1                   | D+V | -        | Groupe Hospitalier Pitié Salpêtrière cohort | 1997 | 2012 | -    | -           | general people         | France    | 10-HCC/PLC/liver cancer   | hepatoprotective proteins (apolipoproteinA1, haptoglobin) , gender, age, gamma-glutamyltranspeptidase, marker of fibrosis (alpha2-macroglobulin)                                                                                                                                                                                               |
|                             | LCR2                   | D   | -        | Groupe Hospitalier Pitié Salpêtrière cohort | 1997 | 2012 | -    | -           | general people         | France    | 5-HCC/PLC/liver cancer    | hepatoprotective proteins (apolipoproteinA1, haptoglobin) , gender, age, gamma-glutamyltranspeptidase, marker of fibrosis (alpha2-macroglobulin)                                                                                                                                                                                               |
|                             | LCR2                   | V   | Internal | Groupe Hospitalier Pitié Salpêtrière cohort | 1997 | 2012 | -    | -           | general people         | France    | 5-HCC/PLC/liver cancer    | hepatoprotective proteins (apolipoproteinA1, haptoglobin) , gender, age, gamma-glutamyltranspeptidase, marker of fibrosis (alpha2-macroglobulin)                                                                                                                                                                                               |
|                             | LCR2                   | D   | -        | Groupe Hospitalier Pitié Salpêtrière cohort | 1997 | 2012 | -    | -           | general people         | France    | 5-HCC/PLC/liver cancer    | hepatoprotective proteins (apolipoproteinA1, haptoglobin) , gender, age, gamma-glutamyltranspeptidase, marker of fibrosis (alpha2-macroglobulin)                                                                                                                                                                                               |
| 10.2147/JHC.S341045         | Elaborate Base Model   | D   | -        | NIH-AARP Diet and Health Study Cohort       | 1995 | 1996 | 2011 | 16 years    | general people         | USA       | >10-HCC/PLC/liver cancer  | age, sex, BMI , height , diabetes, general health status (excellent/very good, good, fair/poor), alcohol, moderate-to-vigorous physical activity (< 3 times/week, ≥3 times/week), dietary cholesterol, saturated fat, trans-fatty acids, ounce equivalents of lean meat from eggs per day, dietary vitamin B6, and healthy eating index scores |
|                             | Elaborate Base Model   | V   | Internal | NIH-AARP Diet and Health Study Cohort       | 1995 | 1996 | 2011 | 16 years    | general people         | USA       | >10-HCC/PLC/liver cancer  | age, sex, BMI , height , diabetes, general health status (excellent/very good, good, fair/poor), alcohol, moderate-to-vigorous physical activity (< 3 times/week, ≥3 times/week), dietary cholesterol, saturated fat, trans-fatty acids, ounce equivalents of lean meat from eggs per day, dietary vitamin B6, and healthy eating index scores |
|                             | Parsimonious Base Mode | D   | -        | NIH-AARP Diet and Health Study Cohort       | 1995 | 1996 | 2011 | 16 years    | general people         | USA       | >10-HCC/PLC/liver cancer  | age, sex, BMI, diabetes, general health status, alcohol, moderate-to-vigorous physical activity, ounce equivalents of lean meat from eggs per day, and healthy eating index scores                                                                                                                                                             |
|                             | Parsimonious Base Mode | V   | Internal | NIH-AARP Diet and Health Study Cohort       | 1995 | 1996 | 2011 | 16 years    | general people         | USA       | >10-HCC/PLC/liver cancer  | age, sex, BMI, diabetes, general health status, alcohol, moderate-to-vigorous physical activity, ounce equivalents of lean meat from eggs per day, and healthy eating index scores                                                                                                                                                             |
|                             | Elaborate Base Model   | V   | Internal | NIH-AARP Diet and Health Study Cohort       | 1995 | 1996 | 2011 | 16 years    | general people         | USA       | >10-HCC/PLC/liver cancer  | age, sex, BMI , height , diabetes, general health status (excellent/very good, good, fair/poor), alcohol, moderate-to-vigorous physical activity (< 3 times/week, ≥3 times/week), dietary cholesterol, saturated fat, trans-fatty acids, ounce equivalents of lean meat from eggs per day, dietary vitamin B6, and healthy eating index scores |
| 10.1016/j.jhep.2013.09.029  | CU-HCC                 | V   | External | Prince of Wales Hospital                    | 2006 | 2008 | -    | 69 months   | HBV infected           | Hong Kong | <5-HCC/PLC/liver cancer   | age, albumin, bilirubin, HBV DNA,and clinical cirrhosis;                                                                                                                                                                                                                                                                                       |
|                             | LSM-HCC                | D   | -        | Prince of Wales Hospital                    | 2007 | 2009 | -    | 69 months   | HBV infected           | Hong Kong | <5-HCC/PLC/liver cancer   | age, albumin, Liver stiffness measurement, HBV DNA,                                                                                                                                                                                                                                                                                            |
|                             | CU-HCC                 | V   | External | Prince of Wales Hospital                    | 2008 | 2010 | -    | 69 months   | HBV infected           | Hong Kong | 5-HCC/PLC/liver cancer    | age, albumin, bilirubin, HBV DNA,and clinical cirrhosis;                                                                                                                                                                                                                                                                                       |
|                             | LSM-HCC                | D   | -        | Prince of Wales Hospital                    | 2009 | 2011 | -    | 69 months   | HBV infected           | Hong Kong | 5-HCC/PLC/liver cancer    | age, albumin, Liver stiffness measurement, HBV DNA,                                                                                                                                                                                                                                                                                            |
|                             | CU-HCC                 | V   | External | Prince of Wales Hospital                    | 2010 | 2012 | -    | 70 months   | HBV infected           | Hong Kong | <5-HCC/PLC/liver cancer   | age, albumin, bilirubin, HBV DNA,and clinical cirrhosis;                                                                                                                                                                                                                                                                                       |
|                             | LSM-HCC                | V   | Internal | Prince of Wales Hospital                    | 2011 | 2013 | -    | 70 months   | HBV infected           | Hong Kong | <5-HCC/PLC/liver cancer   | age, albumin, Liver stiffness measurement, HBV DNA,                                                                                                                                                                                                                                                                                            |
|                             | CU-HCC                 | V   | External | Prince of Wales Hospital                    | 2012 | 2014 | -    | 70 months   | HBV infected           | Hong Kong | 5-HCC/PLC/liver cancer    | age, albumin, bilirubin, HBV DNA,and clinical cirrhosis;                                                                                                                                                                                                                                                                                       |
| 10.1016/j.jhepr.2021.100298 | LCR1:LCR2              | V   | External | ANRS CO22 Hepather cohort                   | 2012 | 2015 | 2020 | -           | HCV infected           | France    | 5-HCC/PLC/liver cancer    | -                                                                                                                                                                                                                                                                                                                                              |
|                             | LCR1:LCR2              | V   | External | ANRS CO22 Hepather cohort                   | 2012 | 2015 | 2020 | -           | HCV infected           | France    | 10-HCC/PLC/liver cancer   | -                                                                                                                                                                                                                                                                                                                                              |
|                             | LCR1:LCR2              | V   | External | ANRS CO22 Hepather cohort                   | 2012 | 2015 | 2020 | -           | HCV infected           | France    | 5~10-HCC/PLC/liver cancer | -                                                                                                                                                                                                                                                                                                                                              |
|                             | ANN-model 1            | D   | -        | NHIRD                                       | 2000 | 2003 | 2009 | -           | patients with diabetes | Taiwan    | 5~10-HCC/PLC/liver cancer | sex, age,alcoholic cirrhosis, nonalcoholic cirrhosis, alcoholic hepatitis, viral hepatitis, other types of chronic hepatitis, alcoholic fatty liver disease, other types of fatty liver disease, and hyperlipidemia                                                                                                                            |
|                             | LR-model 1             | D   | -        | NHIRD                                       | 2000 | 2003 | 2009 | -           | patients with diabetes | Taiwan    | 5~10-HCC/PLC/liver cancer | sex, age,alcoholic cirrhosis, nonalcoholic cirrhosis, alcoholic hepatitis, viral hepatitis, other types of chronic hepatitis, alcoholic fatty liver disease, other types of fatty liver disease, and hyperlipidemia                                                                                                                            |



|                            |             |   |          |                                                                                                                                                                                                                                                |      |      |      |   |                        |             |                           |                                                                                                                                              |
|----------------------------|-------------|---|----------|------------------------------------------------------------------------------------------------------------------------------------------------------------------------------------------------------------------------------------------------|------|------|------|---|------------------------|-------------|---------------------------|----------------------------------------------------------------------------------------------------------------------------------------------|
| 10.1016/j.cmpb.2015.11.009 | ANN-model 2 | D | -        | NHIRD                                                                                                                                                                                                                                          | 2000 | 2003 | 2009 | - | patients with diabetes | Taiwan      | 5~10-HCC/PLC/liver cancer | sex, age, alcoholic cirrhosis, alcoholic hepatitis, alcoholic fatty liver disease                                                            |
|                            | LR-model 2  | D | -        | NHIRD                                                                                                                                                                                                                                          | 2000 | 2003 | 2009 | - | patients with diabetes | Taiwan      | 5~10-HCC/PLC/liver cancer | sex, age, alcoholic cirrhosis, alcoholic hepatitis, alcoholic fatty liver disease                                                            |
|                            | ANN-model 3 | D | -        | NHIRD                                                                                                                                                                                                                                          | 2000 | 2003 | 2009 | - | patients with diabetes | Taiwan      | 5~10-HCC/PLC/liver cancer | sex, age, nonalcoholic cirrhosis, viral hepatitis, other types of chronic hepatitis, other types of fatty liver disease, and hyperlipidemia. |
|                            | LR-model 3  | D | -        | NHIRD                                                                                                                                                                                                                                          | 2000 | 2003 | 2009 | - | patients with diabetes | Taiwan      | 5~10-HCC/PLC/liver cancer | sex, age, nonalcoholic cirrhosis, viral hepatitis, other types of chronic hepatitis, other types of fatty liver disease, and hyperlipidemia. |
| 10.1111/iv.12621           | LSPS        | D | -        | Consecutive patients with CHB who underwent both LB and transient elastography on the same day from January 2006 to February 2010 were identified from the database of Severance Hospital, Yonsei University College of Medicine, Seoul, Korea | 2010 | 2016 | -    | - | HBV infected           | South Korea | 5-HCC/PLC/liver cancer    | Liver stiffness, spleen diameter, platelet count                                                                                             |
|                            | ASPRI       | V | External | Consecutive patients with CHB who underwent both LB and transient elastography on the same day from January 2006 to February 2010 were identified from the database of Severance Hospital, Yonsei University College of Medicine, Seoul, Korea | 2010 | 2016 | -    | - | HBV infected           | South Korea | 5-HCC/PLC/liver cancer    | -                                                                                                                                            |
|                            | LS          | V | External | Consecutive patients with CHB who underwent both LB and transient elastography on the same day from January 2006 to February 2010 were identified from the database of Severance Hospital, Yonsei University College of Medicine, Seoul, Korea | 2010 | 2016 | -    | - | HBV infected           | South Korea | 5-HCC/PLC/liver cancer    | Liver stiffness (LS) value using transient elastography                                                                                      |
|                            | FIB-4       | V | External | Consecutive patients with CHB who underwent both LB and transient elastography on the same day from January 2006 to February 2010 were identified from the database of Severance Hospital, Yonsei University College of Medicine, Seoul, Korea | 2010 | 2016 | -    | - | HBV infected           | South Korea | 5-HCC/PLC/liver cancer    | Platelets, age, aspartate aminotransferase (AST), ALT                                                                                        |
|                            | APRI        | V | External | Consecutive patients with CHB who underwent both LB and transient elastography on the same day from January 2006 to February 2010 were identified from the database of Severance Hospital, Yonsei University College of Medicine, Seoul, Korea | 2010 | 2016 | -    | - | HBV infected           | South Korea | 5-HCC/PLC/liver cancer    | AST, platelet count                                                                                                                          |
| 10.1111/iv.13489           | APRI        | V | External | This is a retrospective cohort study of chronic HBV-infected patients who received care at Samsung Medical Center in Seoul, Korea                                                                                                              | 2006 | 2011 | 2016 | - | HBV infected           | South Korea | 5-HCC/PLC/liver cancer    | AST, platelet count                                                                                                                          |
|                            | FIB-4       | V | External | This is a retrospective cohort study of chronic HBV-infected patients who received care at Samsung Medical Center in Seoul, Korea                                                                                                              | 2006 | 2011 | 2016 | - | HBV infected           | South Korea | 5-HCC/PLC/liver cancer    | Platelets, age, aspartate aminotransferase (AST), ALT                                                                                        |

|                   |           |          |                                                                                      |                                                                                                                                   |      |      |      |              |              |                                                     |                                                     |                                                       |
|-------------------|-----------|----------|--------------------------------------------------------------------------------------|-----------------------------------------------------------------------------------------------------------------------------------|------|------|------|--------------|--------------|-----------------------------------------------------|-----------------------------------------------------|-------------------------------------------------------|
|                   | APRI+FIB4 | V        | External                                                                             | This is a retrospective cohort study of chronic HBV-infected patients who received care at Samsung Medical Center in Seoul, Korea | 2006 | 2011 | 2016 | -            | HBV infected | South Korea                                         | 5-HCC/PLC/liver cancer                              | AST, platelets, age, ALT                              |
| 10.1002/hep.28115 | CU-HCC    | V        | External                                                                             | Severance Hospital, Yonsei University College of Medicine (Seoul, Republic of Korea)                                              | 2006 | 2011 | -    | -            | HBV infected | South Korea                                         | <5-HCC/PLC/liver cancer                             | Age,Albumin, Bilirubin, HBV DNA, Cirrhosis            |
|                   | GAG-HCC   | V        | External                                                                             | Severance Hospital, Yonsei University College of Medicine (Seoul, Republic of Korea)                                              | 2006 | 2011 | -    | -            | HBV infected | South Korea                                         | <5-HCC/PLC/liver cancer                             | Sex,Age ,HBV DNA , Core promoter mutations, Cirrhosis |
|                   | REACH-B   | V        | External                                                                             | Severance Hospital, Yonsei University College of Medicine (Seoul, Republic of Korea)                                              | 2006 | 2011 | -    | -            | HBV infected | South Korea                                         | <5-HCC/PLC/liver cancer                             | Sex ,Age , ALT , HBeAg,HBV DNA                        |
|                   | LSM-HCC   | V        | External                                                                             | Severance Hospital, Yonsei University College of Medicine (Seoul, Republic of Korea)                                              | 2006 | 2011 | -    | -            | HBV infected | South Korea                                         | <5-HCC/PLC/liver cancer                             | Age , Albumin, HBV DNA ,Liver stiffness               |
|                   | mREACH-B  | V        | External                                                                             | Severance Hospital, Yonsei University College of Medicine (Seoul, Republic of Korea)                                              | 2006 | 2011 | -    | -            | HBV infected | South Korea                                         | <5-HCC/PLC/liver cancer                             | Sex ,Age ,ALT ,HBeAg ,Liver stiffness                 |
|                   | CU-HCC    | V        | External                                                                             | Severance Hospital, Yonsei University College of Medicine (Seoul, Republic of Korea)                                              | 2006 | 2011 | -    | -            | HBV infected | South Korea                                         | 5-HCC/PLC/liver cancer                              | Age ,Albumin, Bilirubin, HBV DNA, Cirrhosis           |
|                   | GAG-HCC   | V        | External                                                                             | Severance Hospital, Yonsei University College of Medicine (Seoul, Republic of Korea)                                              | 2006 | 2011 | -    | -            | HBV infected | South Korea                                         | 5-HCC/PLC/liver cancer                              | Sex,Age ,HBV DNA , Core promoter mutations, Cirrhosis |
|                   | REACH-B   | V        | External                                                                             | Severance Hospital, Yonsei University College of Medicine (Seoul, Republic of Korea)                                              | 2006 | 2011 | -    | -            | HBV infected | South Korea                                         | 5-HCC/PLC/liver cancer                              | Sex ,Age , ALT , HBeAg,HBV DNA                        |
|                   | LSM-HCC   | V        | External                                                                             | Severance Hospital, Yonsei University College of Medicine (Seoul, Republic of Korea)                                              | 2006 | 2011 | -    | -            | HBV infected | South Korea                                         | 5-HCC/PLC/liver cancer                              | Age , Albumin, HBV DNA ,Liver stiffness               |
|                   | mREACH-B  | V        | External                                                                             | Severance Hospital, Yonsei University College of Medicine (Seoul, Republic of Korea)                                              | 2006 | 2011 | -    | -            | HBV infected | South Korea                                         | 5-HCC/PLC/liver cancer                              | Sex ,Age ,ALT ,HBeAg ,Liver stiffness                 |
|                   | CU-HCC    | V        | External                                                                             | Severance Hospital, Yonsei University College of Medicine (Seoul, Republic of Korea)                                              | 2006 | 2011 | -    | -            | HBV infected | South Korea                                         | <5-SLD/advanced liver disease/cirrhosis/liver death | Age ,Albumin, Bilirubin, HBV DNA, Cirrhosis           |
|                   | GAG-HCC   | V        | External                                                                             | Severance Hospital, Yonsei University College of Medicine (Seoul, Republic of Korea)                                              | 2006 | 2011 | -    | -            | HBV infected | South Korea                                         | <5-SLD/advanced liver disease/cirrhosis/liver death | Sex,Age ,HBV DNA , Core promoter mutations, Cirrhosis |
|                   | REACH-B   | V        | External                                                                             | Severance Hospital, Yonsei University College of Medicine (Seoul, Republic of Korea)                                              | 2006 | 2011 | -    | -            | HBV infected | South Korea                                         | <5-SLD/advanced liver disease/cirrhosis/liver death | Sex ,Age , ALT , HBeAg,HBV DNA                        |
| LSM-HCC           | V         | External | Severance Hospital, Yonsei University College of Medicine (Seoul, Republic of Korea) | 2006                                                                                                                              | 2011 | -    | -    | HBV infected | South Korea  | <5-SLD/advanced liver disease/cirrhosis/liver death | Age , Albumin, HBV DNA ,Liver stiffness             |                                                       |

|          |   |          |                                                                                                                                                                                            |      |      |   |   |              |             |                                                     |                                                        |
|----------|---|----------|--------------------------------------------------------------------------------------------------------------------------------------------------------------------------------------------|------|------|---|---|--------------|-------------|-----------------------------------------------------|--------------------------------------------------------|
| mREACH-B | V | External | Severance Hospital, Yonsei University College of Medicine (Seoul, Republic of Korea)                                                                                                       | 2006 | 2011 | - | - | HBV infected | South Korea | <5-SLD/advanced liver disease/cirrhosis/liver death | Sex ,Age ,ALT ,HBeAg ,Liver stiffness                  |
| CU-HCC   | V | External | Severance Hospital, Yonsei University College of Medicine (Seoul, Republic of Korea)                                                                                                       | 2006 | 2011 | - | - | HBV infected | South Korea | 5-SLD/advanced liver disease/cirrhosis/liver death  | Age ,Albumin, Bilirubin, HBV DNA, Cirrhosis            |
| GAG-HCC  | V | External | Severance Hospital, Yonsei University College of Medicine (Seoul, Republic of Korea)                                                                                                       | 2006 | 2011 | - | - | HBV infected | South Korea | 5-SLD/advanced liver disease/cirrhosis/liver death  | Sex, Age ,HBV DNA , Core promoter mutations, Cirrhosis |
| REACH-B  | V | External | Severance Hospital, Yonsei University College of Medicine (Seoul, Republic of Korea)                                                                                                       | 2006 | 2011 | - | - | HBV infected | South Korea | 5-SLD/advanced liver disease/cirrhosis/liver death  | Sex ,Age , ALT , HBeAg, HBV DNA                        |
| LSM-HCC  | V | External | Severance Hospital, Yonsei University College of Medicine (Seoul, Republic of Korea)                                                                                                       | 2006 | 2011 | - | - | HBV infected | South Korea | 5-SLD/advanced liver disease/cirrhosis/liver death  | Age , Albumin, HBV DNA ,Liver stiffness                |
| mREACH-B | V | External | Severance Hospital, Yonsei University College of Medicine (Seoul, Republic of Korea)                                                                                                       | 2006 | 2011 | - | - | HBV infected | South Korea | 5-SLD/advanced liver disease/cirrhosis/liver death  | Sex ,Age ,ALT ,HBeAg ,Liver stiffness                  |
| CU-HCC   | V | External | From 2006 to 2014, a total of 1505 CHB patients who underwent LS measurements using TE at different time points at Severance Hospital, Yonsei University College of Medicine, Seoul, Korea | 2006 | 2014 | - | - | HBV infected | South Korea | <5-HCC/PLC/liver cancer                             | Age ,Albumin, Bilirubin, HBV DNA, Cirrhosis            |
| REACH-B  | V | External | From 2006 to 2014, a total of 1505 CHB patients who underwent LS measurements using TE at different time points at Severance Hospital, Yonsei University College of Medicine, Seoul, Korea | 2006 | 2014 | - | - | HBV infected | South Korea | <5-HCC/PLC/liver cancer                             | Sex ,Age , ALT , HBeAg, HBV DNA                        |
| LSM-HCC  | V | External | From 2006 to 2014, a total of 1505 CHB patients who underwent LS measurements using TE at different time points at Severance Hospital, Yonsei University College of Medicine, Seoul, Korea | 2006 | 2014 | - | - | HBV infected | South Korea | <5-HCC/PLC/liver cancer                             | Age , Albumin, HBV DNA ,Liver stiffness                |
| mREACH-B | V | External | From 2006 to 2014, a total of 1505 CHB patients who underwent LS measurements using TE at different time points at Severance Hospital, Yonsei University College of Medicine, Seoul, Korea | 2006 | 2014 | - | - | HBV infected | South Korea | <5-HCC/PLC/liver cancer                             | Sex ,Age ,ALT ,HBeAg ,Liver stiffness                  |
| CU-HCC   | V | External | From 2006 to 2014, a total of 1505 CHB patients who underwent LS measurements using TE at different time points at Severance Hospital, Yonsei University College of Medicine, Seoul, Korea | 2006 | 2014 | - | - | HBV infected | South Korea | 5-HCC/PLC/liver cancer                              | Age ,Albumin, Bilirubin, HBV DNA, Cirrhosis            |

|          |   |          |                                                                                                                                                                                            |      |      |   |   |              |             |                           |                                             |
|----------|---|----------|--------------------------------------------------------------------------------------------------------------------------------------------------------------------------------------------|------|------|---|---|--------------|-------------|---------------------------|---------------------------------------------|
| REACH-B  | V | External | From 2006 to 2014, a total of 1505 CHB patients who underwent LS measurements using TE at different time points at Severance Hospital, Yonsei University College of Medicine, Seoul, Korea | 2006 | 2014 | - | - | HBV infected | South Korea | 5-HCC/PLC/liver cancer    | Sex ,Age , ALT , HBeAg,HBV DNA              |
| LSM-HCC  | V | External | From 2006 to 2014, a total of 1505 CHB patients who underwent LS measurements using TE at different time points at Severance Hospital, Yonsei University College of Medicine, Seoul, Korea | 2006 | 2014 | - | - | HBV infected | South Korea | 5-HCC/PLC/liver cancer    | Age , Albumin, HBV DNA ,Liver stiffness     |
| mREACH-B | V | External | From 2006 to 2014, a total of 1505 CHB patients who underwent LS measurements using TE at different time points at Severance Hospital, Yonsei University College of Medicine, Seoul, Korea | 2006 | 2014 | - | - | HBV infected | South Korea | 5-HCC/PLC/liver cancer    | Sex ,Age ,ALT ,HBeAg ,Liver stiffness       |
| CU-HCC   | V | External | From 2006 to 2014, a total of 1505 CHB patients who underwent LS measurements using TE at different time points at Severance Hospital, Yonsei University College of Medicine, Seoul, Korea | 2006 | 2014 | - | - | HBV infected | South Korea | 5~10-HCC/PLC/liver cancer | Age ,Albumin, Bilirubin, HBV DNA, Cirrhosis |
| REACH-B  | V | External | From 2006 to 2014, a total of 1505 CHB patients who underwent LS measurements using TE at different time points at Severance Hospital, Yonsei University College of Medicine, Seoul, Korea | 2006 | 2014 | - | - | HBV infected | South Korea | 5~10-HCC/PLC/liver cancer | Sex ,Age , ALT , HBeAg,HBV DNA              |
| LSM-HCC  | V | External | From 2006 to 2014, a total of 1505 CHB patients who underwent LS measurements using TE at different time points at Severance Hospital, Yonsei University College of Medicine, Seoul, Korea | 2006 | 2014 | - | - | HBV infected | South Korea | 5~10-HCC/PLC/liver cancer | Age , Albumin, HBV DNA ,Liver stiffness     |
| mREACH-B | V | External | From 2006 to 2014, a total of 1505 CHB patients who underwent LS measurements using TE at different time points at Severance Hospital, Yonsei University College of Medicine, Seoul, Korea | 2006 | 2014 | - | - | HBV infected | South Korea | 5~10-HCC/PLC/liver cancer | Sex ,Age ,ALT ,HBeAg ,Liver stiffness       |
| CU-HCC   | V | External | From 2006 to 2014, a total of 1505 CHB patients who underwent LS measurements using TE at different time points at Severance Hospital, Yonsei University College of Medicine, Seoul, Korea | 2006 | 2014 | - | - | HBV infected | South Korea | <5-HCC/PLC/liver cancer   | Age ,Albumin, Bilirubin, HBV DNA, Cirrhosis |

|          |   |          |                                                                                                                                                                                            |      |      |   |   |              |             |                           |                                             |
|----------|---|----------|--------------------------------------------------------------------------------------------------------------------------------------------------------------------------------------------|------|------|---|---|--------------|-------------|---------------------------|---------------------------------------------|
| REACH-B  | V | External | From 2006 to 2014, a total of 1505 CHB patients who underwent LS measurements using TE at different time points at Severance Hospital, Yonsei University College of Medicine, Seoul, Korea | 2006 | 2014 | - | - | HBV infected | South Korea | <5-HCC/PLC/liver cancer   | Sex ,Age , ALT , HBeAg,HBV DNA              |
| LSM-HCC  | V | External | From 2006 to 2014, a total of 1505 CHB patients who underwent LS measurements using TE at different time points at Severance Hospital, Yonsei University College of Medicine, Seoul, Korea | 2006 | 2014 | - | - | HBV infected | South Korea | <5-HCC/PLC/liver cancer   | Age , Albumin, HBV DNA ,Liver stiffness     |
| mREACH-B | V | External | From 2006 to 2014, a total of 1505 CHB patients who underwent LS measurements using TE at different time points at Severance Hospital, Yonsei University College of Medicine, Seoul, Korea | 2006 | 2014 | - | - | HBV infected | South Korea | <5-HCC/PLC/liver cancer   | Sex ,Age ,ALT ,HBeAg ,Liver stiffness       |
| CU-HCC   | V | External | From 2006 to 2014, a total of 1505 CHB patients who underwent LS measurements using TE at different time points at Severance Hospital, Yonsei University College of Medicine, Seoul, Korea | 2006 | 2014 | - | - | HBV infected | South Korea | 5-HCC/PLC/liver cancer    | Age ,Albumin, Bilirubin, HBV DNA, Cirrhosis |
| REACH-B  | V | External | From 2006 to 2014, a total of 1505 CHB patients who underwent LS measurements using TE at different time points at Severance Hospital, Yonsei University College of Medicine, Seoul, Korea | 2006 | 2014 | - | - | HBV infected | South Korea | 5-HCC/PLC/liver cancer    | Sex ,Age , ALT , HBeAg,HBV DNA              |
| LSM-HCC  | V | External | From 2006 to 2014, a total of 1505 CHB patients who underwent LS measurements using TE at different time points at Severance Hospital, Yonsei University College of Medicine, Seoul, Korea | 2006 | 2014 | - | - | HBV infected | South Korea | 5-HCC/PLC/liver cancer    | Age , Albumin, HBV DNA ,Liver stiffness     |
| mREACH-B | V | External | From 2006 to 2014, a total of 1505 CHB patients who underwent LS measurements using TE at different time points at Severance Hospital, Yonsei University College of Medicine, Seoul, Korea | 2006 | 2014 | - | - | HBV infected | South Korea | 5-HCC/PLC/liver cancer    | Sex ,Age ,ALT ,HBeAg ,Liver stiffness       |
| CU-HCC   | V | External | From 2006 to 2014, a total of 1505 CHB patients who underwent LS measurements using TE at different time points at Severance Hospital, Yonsei University College of Medicine, Seoul, Korea | 2006 | 2014 | - | - | HBV infected | South Korea | 5-10-HCC/PLC/liver cancer | Age ,Albumin, Bilirubin, HBV DNA, Cirrhosis |

|                            |                    |   |          |                                                                                                                                                                                            |      |      |   |   |              |                                       |                                                     |                                                                           |
|----------------------------|--------------------|---|----------|--------------------------------------------------------------------------------------------------------------------------------------------------------------------------------------------|------|------|---|---|--------------|---------------------------------------|-----------------------------------------------------|---------------------------------------------------------------------------|
|                            | REACH-B            | V | External | From 2006 to 2014, a total of 1505 CHB patients who underwent LS measurements using TE at different time points at Severance Hospital, Yonsei University College of Medicine, Seoul, Korea | 2006 | 2014 | - | - | HBV infected | South Korea                           | 5-10-HCC/PLC/liver cancer                           | Sex ,Age , ALT , HBeAg,HBV DNA                                            |
|                            | LSM-HCC            | V | External | From 2006 to 2014, a total of 1505 CHB patients who underwent LS measurements using TE at different time points at Severance Hospital, Yonsei University College of Medicine, Seoul, Korea | 2006 | 2014 | - | - | HBV infected | South Korea                           | 5-10-HCC/PLC/liver cancer                           | Age , Albumin, HBV DNA ,Liver stiffness                                   |
|                            | mREACH-B           | V | External | From 2006 to 2014, a total of 1505 CHB patients who underwent LS measurements using TE at different time points at Severance Hospital, Yonsei University College of Medicine, Seoul, Korea | 2006 | 2014 | - | - | HBV infected | South Korea                           | 5-10-HCC/PLC/liver cancer                           | Sex ,Age ,ALT ,HBeAg ,Liver stiffness                                     |
| 10.1136/gutjal-2014-309999 | CU-HCC             | V | External | -                                                                                                                                                                                          | -    | -    | - | - | HBV infected | mixed ethnicities: Asian and no-Asian | <5-HCC/PLC/liver cancer                             | Age, Albumin, Bilirubin, HBV DNA, Cirrhosis                               |
|                            | REACH-B            | V | External | -                                                                                                                                                                                          | -    | -    | - | - | HBV infected | mixed ethnicities: Asian and no-Asian | <5-HCC/PLC/liver cancer                             | Sex ,Age , ALT , HBeAg,HBV DNA                                            |
|                            | NGM1-HCC           | V | External | -                                                                                                                                                                                          | -    | -    | - | - | HBV infected | mixed ethnicities: Asian and no-Asian | <5-HCC/PLC/liver cancer                             | -                                                                         |
|                            | NGM2-HCC           | V | External | -                                                                                                                                                                                          | -    | -    | - | - | HBV infected | mixed ethnicities: Asian and no-Asian | <5-HCC/PLC/liver cancer                             | -                                                                         |
|                            | GAG-HCC            | V | External | -                                                                                                                                                                                          | -    | -    | - | - | HBV infected | mixed ethnicities: Asian and no-Asian | <5-HCC/PLC/liver cancer                             | Sex, Age ,HBV DNA , Core promoter mutations, Cirrhosis                    |
|                            | GAG-HCC            | V | External | -                                                                                                                                                                                          | -    | -    | - | - | HBV infected | mixed ethnicities: Asian and no-Asian | 5-HCC/PLC/liver cancer                              | Sex, Age ,HBV DNA , Core promoter mutations, Cirrhosis                    |
| 10.1111/jvh.12727          | PAGE-B             | V | External | -                                                                                                                                                                                          | 1985 | 2012 | - | - | HBV infected | Netherlands                           | 10-SLD/advanced liver disease/cirrhosis/liver death | Platelets, gender, age                                                    |
|                            | REACH-B            | V | External | -                                                                                                                                                                                          | 1985 | 2012 | - | - | HBV infected | Netherlands                           | 10-SLD/advanced liver disease/cirrhosis/liver death | Gender, age, ALT, HBeAg status, hepatitis B virus(HBV)DNA load(copies/mL) |
|                            | FIB-4              | V | External | -                                                                                                                                                                                          | 1985 | 2012 | - | - | HBV infected | Netherlands                           | 10-SLD/advanced liver disease/cirrhosis/liver death | Platelets, age, aspartate aminotransferase (AST), ALT                     |
|                            | Log APRI           | V | External | -                                                                                                                                                                                          | 1985 | 2012 | - | - | HBV infected | Netherlands                           | 10-SLD/advanced liver disease/cirrhosis/liver death | Platelets, AST                                                            |
|                            | PAGE-B + Ishak     | V | External | -                                                                                                                                                                                          | 1985 | 2012 | - | - | HBV infected | Netherlands                           | 10-SLD/advanced liver disease/cirrhosis/liver death | Gender, age, ALT, HBeAg status, hepatitis B virus(HBV)DNA load(copies/mL) |
|                            | GAG-HCC            | V | External | -                                                                                                                                                                                          | 1985 | 2012 | - | - | HBV infected | Netherlands                           | 10-SLD/advanced liver disease/cirrhosis/liver death | Gender, age, HBV DNA load(copies/mL), cirrhosis(US+)                      |
|                            | CU-HCC             | V | External | -                                                                                                                                                                                          | 1985 | 2012 | - | - | HBV infected | Netherlands                           | 10-SLD/advanced liver disease/cirrhosis/liver death | Age, albumin, bilirubin, HBV DNA load(copies/mL), cirrhosis (US+)         |
|                            | Ishak fibrosis     | V | External | -                                                                                                                                                                                          | 1985 | 2012 | - | - | HBV infected | Netherlands                           | 10-SLD/advanced liver disease/cirrhosis/liver death | Ishak fibrosis                                                            |
|                            | PAGE-B             | V | External | -                                                                                                                                                                                          | 1985 | 2012 | - | - | HBV infected | Netherlands                           | 10-HCC/PLC/liver cancer                             | Platelets, gender, age                                                    |
|                            | REACH-B            | V | External | -                                                                                                                                                                                          | 1985 | 2012 | - | - | HBV infected | Netherlands                           | 10-HCC/PLC/liver cancer                             | Gender, age, ALT, HBeAg status, hepatitis B virus(HBV)DNA load(copies/mL) |
|                            | FIB-4              | V | External | -                                                                                                                                                                                          | 1985 | 2012 | - | - | HBV infected | Netherlands                           | 10-HCC/PLC/liver cancer                             | Platelets, age, aspartate aminotransferase (AST), ALT                     |
|                            | Log APRI           | V | External | -                                                                                                                                                                                          | 1985 | 2012 | - | - | HBV infected | Netherlands                           | 10-HCC/PLC/liver cancer                             | Platelets, AST                                                            |
|                            | PAGE-B + Ishak     | V | External | -                                                                                                                                                                                          | 1985 | 2012 | - | - | HBV infected | Netherlands                           | 10-HCC/PLC/liver cancer                             | Gender, age, ALT, HBeAg status, hepatitis B virus(HBV)DNA load(copies/mL) |
|                            | GAG-HCC            | V | External | -                                                                                                                                                                                          | 1985 | 2012 | - | - | HBV infected | Netherlands                           | 10-HCC/PLC/liver cancer                             | Gender, age, HBV DNA load(copies/mL), cirrhosis(US+)                      |
|                            | CU-HCC             | V | External | -                                                                                                                                                                                          | 1985 | 2012 | - | - | HBV infected | Netherlands                           | 10-HCC/PLC/liver cancer                             | Age, albumin, bilirubin, HBV DNA load(copies/mL), cirrhosis (US+)         |
|                            | Ishak fibrosis     | V | External | -                                                                                                                                                                                          | 1985 | 2012 | - | - | HBV infected | Netherlands                           | 10-HCC/PLC/liver cancer                             | Ishak fibrosis                                                            |
| 10.1136/gutjal-2015-310818 | RWS-HCC            | D | -        | Singapore General Hospital Department of Gastroenterology and Hepatology with ethics approval.                                                                                             | -    | -    | - | - | HBV infected | Singapore                             | 10-HCC/PLC/liver cancer                             | age, gender, cirrhosis, serum AFP                                         |
|                            | RWS-HCC            | V | External | REACH-B cohorts                                                                                                                                                                            | -    | -    | - | - | HBV infected | Asia                                  | 10-HCC/PLC/liver cancer                             | age, gender, cirrhosis, serum AFP                                         |
|                            | RWS-HCC            | V | External | GAG-HCC cohort                                                                                                                                                                             | -    | -    | - | - | HBV infected | Asia                                  | 10-HCC/PLC/liver cancer                             | age, gender, cirrhosis, serum AFP                                         |
|                            | RWS-HCC            | V | External | CU-HCC cohort                                                                                                                                                                              | -    | -    | - | - | HBV infected | Asia                                  | 10-HCC/PLC/liver cancer                             | age, gender, cirrhosis, serum AFP                                         |
| 10.1007/s10620-020-06762-w | Liver Volume Index | D | -        | CHC Patients                                                                                                                                                                               | 2003 | 2016 | - | - | HCV infected | South Korea                           | <5-HCC/PLC/liver cancer                             | Volume Index, cirrhosis, GGT > 80 U/L                                     |
|                            | Liver Volume Index | D | -        | CHC Patients                                                                                                                                                                               | 2003 | 2016 | - | - | HCV infected | South Korea                           | 5-HCC/PLC/liver cancer                              | Volume Index, cirrhosis, GGT > 80 U/L                                     |
|                            | Liver Volume Index | D | -        | CHC Patients                                                                                                                                                                               | 2003 | 2016 | - | - | HCV infected | South Korea                           | 5-10-HCC/PLC/liver cancer                           | Volume Index, cirrhosis, GGT > 80 U/L                                     |
|                            | Liver Volume Index | V | Internal | CHC Patients                                                                                                                                                                               | 2003 | 2016 | - | - | HCV infected | South Korea                           | <5-HCC/PLC/liver cancer                             | Volume Index, cirrhosis, GGT > 80 U/L                                     |
|                            | Liver Volume Index | V | Internal | CHC Patients                                                                                                                                                                               | 2003 | 2016 | - | - | HCV infected | South Korea                           | <5-HCC/PLC/liver cancer                             | Volume Index, cirrhosis, GGT > 80 U/L                                     |
|                            | Liver Volume Index | V | Internal | CHC Patients                                                                                                                                                                               | 2003 | 2016 | - | - | HCV infected | South Korea                           | 5-10-HCC/PLC/liver cancer                           | Volume Index, cirrhosis, GGT > 80 U/L                                     |
